# Supplementary material for: Four simple rules that are sufficient to generate the mammalian blastocyst
Source: PLoS Biol. 2017 Jul 12;15(7):e2000737. doi: 10.1371/journal.pbio.2000737 (PMC5507476; doi:10.1371/journal.pbio.2000737)
Supplement: S2 Data — Data used to generate Figs 6 and 7 and S3 and S4 Figs. (XLSX) [file pbio.2000737.s008.xlsx]

## Sheet: Ark1
Embryonic day	# of Aggregates	FGF delay in hours	Month of the year where exp. was performed	Serie no.	Dapi	Nanog	Cdx2	Gata6	Cell type	xPos [um]	yPos [um]	zPos [um]
3	1	0	3	1	78.7333	19.3467	146.44	111.293	4	83.851	86.029	59.9957
3	1	0	3	1	48.64	11.8933	165.813	95.0133	4	100.186	79.931	61.9956		Cell type
3	1	0	3	1	44.0133	14.8133	133.52	111.347	4	97.355	92.781	61.9956		1	Gata6
3	1	0	3	1	63.7333	6.28	173.6	94.72	4	85.158	101.711	69.995		2	Nanog
3	1	0	3	1	64.64	16.2	175.533	106.267	4	108.68	109.551	75.9946		3	DP
3	1	0	3	1	58.0133	10.3867	191.387	79.44	4	116.303	80.367	71.9949		4	Cdx2
3	1	0	3	1	53.9067	19	107.36	67.64	4	76.882	67.734	63.9955
3	1	0	3	1	35.2533	15.9333	90.0267	66.4133	4	94.741	59.24	57.9959
3	1	0	3	1	43.68	24.1333	218.667	117.24	4	54.449	69.912	71.9949
3	1	0	3	1	30.8933	29.0533	178.64	130.587	4	63.161	46.173	73.9947
3	1	0	3	1	45.16	13.2	149.413	55.7733	4	94.088	45.519	83.994
3	1	0	3	1	52.6133	13.92	106.387	106.52	1	120.877	73.615	85.9939
3	1	0	3	1	45.04	33.88	80.64	115.507	3	113.472	57.934	71.9949
3	1	0	3	1	26.9333	21.08	58.16	87.36	3	110.858	49.875	83.994
3	1	0	3	1	52.3867	9.98667	148.653	141.08	4	115.432	100.186	83.994
3	1	0	3	1	39.5867	7.02667	106.44	108.6	1	120.005	115.432	85.9939
3	1	0	3	1	32.04	15.44	86.0933	55.8267	4	116.085	107.809	97.993
3	1	0	3	1	40.7867	6.65333	156.493	82.6133	4	82.545	113.254	91.9935
3	1	0	3	1	95.88	13.7467	95.6	104.173	1	83.851	98.226	91.9935
3	1	0	3	1	45.8267	17.9067	115.093	109.013	4	77.317	101.928	83.994
3	1	0	3	1	49.0667	2.78667	102.2	53.5733	4	67.081	97.137	91.9935
3	1	0	3	1	22.5733	4.76	86.44	36.44	4	121.53	95.177	105.992
3	1	0	3	1	29.8267	4.18667	73.3333	73.4133	1	97.137	114.778	91.9935
3	1	0	3	1	25.8533	15.4	108.573	69.1333	4	78.189	41.599	89.9936
3	1	0	3	1	84.12	22.0933	117.827	100.04	4	76.882	55.102	81.9942
3	1	0	3	1	68.84	30.0933	84.8267	59.6267	4	80.802	52.924	69.995
3	1	0	3	1	55.8533	8.37333	59.9333	161.2	1	92.345	72.09	69.995
3	1	0	3	1	52.7867	10.08	82.3733	37.5467	4	67.952	59.894	77.9945
3	1	0	3	1	49.6667	13	68.1467	112.72	1	106.502	71.219	77.9945
3	1	0	3	1	41.5333	12.8667	45.5067	122.973	1	62.29	73.179	75.9946
3	1	0	3	1	67.7867	9.28	57.0933	104.253	1	118.045	83.851	89.9936
3	1	0	3	1	54.0533	7.81333	78.5733	104.827	1	113.689	74.051	97.993
3	1	0	3	1	38.0267	10.5067	58.04	101.453	1	103.671	65.992	89.9936
3	1	0	3	1	34.6933	11.5733	47.5467	137.52	1	111.947	92.999	71.9949
3	1	0	3	1	85.4267	10.5067	62.2267	138.893	1	94.088	88.425	73.9947
3	1	0	3	1	35.1867	17.76	67.0267	111.293	3	72.744	87.554	63.9955
3	1	0	3	1	45.24	16.32	56.8	84.7733	3	97.137	54.884	77.9945
3	1	0	3	1	35.5733	7.41333	28	72.72	1	88.643	65.339	69.995
3	1	0	3	2	76.7867	13.24	185.973	36.56	4	89.514	68.606	27.9979
3	1	0	3	2	68.0667	14.2933	210.507	41.96	4	84.505	73.397	27.9979
3	1	0	3	2	111.813	6.29333	228.467	106.413	4	94.959	92.128	31.9977
3	1	0	3	2	79.04	6.84	234.28	73.72	4	79.495	85.811	31.9977
3	1	0	3	2	72.8667	13.6133	180.667	75.9467	4	102.146	73.615	27.9979
3	1	0	3	2	68.76	11.2267	176.893	55.16	4	112.383	78.624	27.9979
3	1	0	3	2	92.84	39.9867	167.24	177.12	3	106.938	88.861	31.9977
3	1	0	3	2	89.16	4.65333	247.987	104.387	4	120.223	85.594	49.9963
3	1	0	3	2	54.5733	2.34667	157.907	63.7733	4	104.76	106.502	49.9963
3	1	0	3	2	87.04	4.88	232.787	132.987	4	80.802	109.769	55.9959
3	1	0	3	2	113.053	11.0667	254.947	158.48	4	64.903	102.146	55.9959
3	1	0	3	2	49.1467	4.34667	238.733	100.027	4	69.912	94.305	39.9971
3	1	0	3	2	79.2	5.21333	248.853	108.04	4	60.112	89.732	43.9968
3	1	0	3	2	105.613	10.24	247.747	55.32	4	60.329	76.446	41.9969
3	1	0	3	2	159.787	5.61333	254.453	58.9733	4	62.507	58.805	47.9965
3	1	0	3	2	62.0533	6.73333	228.707	43.5467	4	72.09	67.299	29.9978
3	1	0	3	2	61.4933	32.32	231.427	77.8133	4	84.505	57.498	27.9979
3	1	0	3	2	61.4133	31.2133	193.72	54.6667	4	87.554	48.351	39.9971
3	1	0	3	2	80.04	16.88	247.48	95.3733	4	73.397	49.44	51.9962
3	1	0	3	2	153.907	34.48	254.533	141.56	4	98.444	49.44	47.9965
3	1	0	3	2	72.4533	6.2	224.56	58.24	4	101.928	54.449	31.9977
3	1	0	3	2	63.9733	2.81333	181.72	35.9867	4	110.64	58.587	33.9975
3	1	0	3	2	167.733	16.92	254.693	84.04	4	129.371	65.339	59.9956
3	1	0	3	2	108.533	18.44	235.88	91.16	4	124.797	50.746	59.9956
3	1	0	3	2	100.853	1.4	196.56	35.64	4	119.134	46.173	65.9952
3	1	0	3	2	91.5467	3.24	238.187	117.64	4	120.005	64.903	41.9969
3	1	0	3	2	57.08	29.0133	151.787	84.5867	4	110.858	96.919	41.9969
3	1	0	3	2	98.7867	8.41333	246.267	165.693	4	85.376	102.146	35.9974
3	1	0	3	2	80.9733	7.24	192.893	53.4267	4	86.029	44.866	65.9952
3	1	0	3	2	76.0667	23.6667	156.773	77.5467	4	92.563	43.777	55.9959
3	1	0	3	2	50.92	21.16	229.213	72.0667	4	99.968	40.728	65.9952
3	1	0	3	2	67.6533	18.16	206.867	67.1333	4	105.849	49.004	55.9959
3	1	0	3	2	129.04	5.88	243.533	61.2267	4	118.916	68.823	51.9962
3	1	0	3	2	59.1067	1.64	107.96	17.4533	4	122.183	76.228	75.9944
3	1	0	3	2	116.72	10.36	232.893	57.5733	4	62.072	93.217	67.995
3	1	0	3	2	130.947	3.74667	168.213	31.2667	4	56.845	86.683	65.9952
3	1	0	3	2	72.64	18.8	115.573	44.7733	4	71.873	64.032	65.9952
3	1	0	3	2	126.68	13.76	147.947	46.2933	4	75.357	56.409	73.9946
3	1	0	3	2	77.7467	2.73333	120.68	30.2133	4	116.085	58.587	53.996
3	1	0	3	2	133.84	3.44	151.16	53.5467	4	84.287	106.284	69.9949
3	1	0	3	2	114.387	4.84	92.16	44.8933	4	82.545	91.474	71.9947
3	1	0	3	2	47.1067	1.68	123.693	33.64	4	66.21	74.486	71.9947
3	1	0	3	2	65.92	41.4933	65.2667	146.8	3	101.493	99.75	41.9969
3	1	0	3	2	48.5467	30.4267	52.76	65.3867	3	78.406	94.959	57.9957
3	1	0	3	2	123.267	27.9467	53.08	75.0933	3	82.327	69.477	59.9956
3	1	0	3	2	92.4133	35.1733	205.667	74.68	4	74.268	54.013	61.9954
3	1	0	3	2	84.7467	16.6133	96.7333	130.52	3	83.634	88.643	45.9966
3	1	0	3	2	175.387	11.12	136.8	161.373	1	93.652	90.821	43.9968
3	1	0	3	2	99.12	3.14667	49.7067	157.133	1	95.177	69.041	41.9969
3	1	0	3	2	115.093	17.5733	61.8133	105.68	3	100.622	78.406	43.9968
3	1	0	3	2	67.16	6.02667	28.36	121.827	1	94.523	58.805	47.9965
3	2	0	3	1	89.12	15.6933	229.08	181.253	4	71.001	76.011	25.9981
3	2	0	3	1	60.2	5.26667	159.133	53.92	4	81.456	78.189	25.9981
3	2	0	3	1	91.8267	7.42667	190.28	125.893	4	86.247	70.784	25.9981
3	2	0	3	1	95.2133	2.88	179.653	150.493	4	94.088	80.584	25.9981
3	2	0	3	1	58.6667	13.3467	184.653	82.72	4	93.652	94.305	25.9981
3	2	0	3	1	78.56	5.82667	206.8	120.267	4	88.425	99.533	31.9977
3	2	0	3	1	101.627	9.64	254.027	140.36	4	96.483	105.631	37.9973
3	2	0	3	1	91.1867	17.7067	243.4	141.28	4	64.903	57.062	31.9977
3	2	0	3	1	84.4	6.06667	248.707	101.747	4	60.329	66.645	29.9979
3	2	0	3	1	81.8267	4.26667	250.88	149.253	4	59.24	74.051	25.9981
3	2	0	3	1	114.867	10.7067	249	83.68	4	58.587	86.465	29.9979
3	2	0	3	1	123.24	15.2933	241.813	126.373	4	62.507	92.999	31.9977
3	2	0	3	1	99.9733	8.46667	254.6	168.2	4	52.271	98.226	27.998
3	2	0	3	1	116.04	5.28	252.747	205.773	4	46.39	85.811	35.9974
3	2	0	3	1	89.6133	5.77333	243.653	110.747	4	50.311	77.753	31.9977
3	2	0	3	1	119.84	5.52	246.813	65.9067	4	41.163	79.931	61.9956
3	2	0	3	1	252.973	4.37333	248.36	103.027	4	44.43	61.854	45.9967
3	2	0	3	1	112.24	2.2	220.747	38.48	4	41.817	71.001	45.9967
3	2	0	3	1	162.333	2.25333	213.813	53.1867	4	51.618	57.934	29.9979
3	2	0	3	1	163.093	11.3867	250.48	103.36	4	75.357	52.924	39.9971
3	2	0	3	1	128.973	9.41333	249.52	78.44	4	76.228	44.866	53.9961
3	2	0	3	1	162.147	4.68	234.493	98.24	4	66.21	51.4	47.9966
3	2	0	3	1	90.6667	8.62667	230.6	63.8933	4	88.425	42.252	55.996
3	2	0	3	1	100.32	24.2	202.773	55.28	4	91.256	52.053	45.9967
3	2	0	3	1	100.333	4.58667	235.507	76.16	4	86.029	57.062	37.9973
3	2	0	3	1	75.1067	3.93333	207.907	46.6533	4	94.741	60.983	37.9973
3	2	0	3	1	77.3067	3.24	234.267	61.6267	4	101.493	62.507	41.997
3	2	0	3	1	106.72	5.94667	251.307	74.0933	4	106.938	62.725	59.9957
3	2	0	3	1	63.4667	7.52	225.12	86.9067	4	100.186	72.744	35.9974
3	2	0	3	1	88.5467	5.2	242.24	33.1867	4	107.373	72.526	49.9964
3	2	0	3	1	55.52	6.02667	120.827	72.4667	4	81.02	62.725	27.998
3	2	0	3	1	98.5467	6.05333	171.24	115.6	4	78.406	106.066	25.9981
3	2	0	3	1	126.04	9.68	253.573	95.1467	4	71.873	102.146	25.9981
3	2	0	3	1	102.333	9.16	254.507	190.587	4	85.158	111.076	29.9979
3	2	0	3	1	59.36	3.34667	195.16	47.48	4	102.146	49.44	49.9964
3	2	0	3	1	95.7467	6.38667	167.04	23.5733	4	38.985	56.627	41.997
3	2	0	3	1	112.733	2.45333	92.0533	36.6	4	48.568	93.652	51.9963
3	2	0	3	1	91.12	12.0133	234.8	107.72	4	63.161	104.324	29.9979
3	2	0	3	1	74.1067	7.25333	212.427	94.2933	4	67.517	112.6	45.9967
3	2	0	3	1	151.36	14.5867	253.947	83.5333	4	106.066	99.097	45.9967
3	2	0	3	1	143.533	18.2	240.747	61.76	4	102.146	103.453	65.9953
3	2	0	3	1	147.987	7.8	226.84	21.7733	4	52.924	49.222	37.9973
3	2	0	3	1	210.373	5.21333	159.4	112.24	4	59.24	88.643	47.9966
3	2	0	3	1	143.693	3.72	199.307	144.027	4	57.716	72.308	41.997
3	2	0	3	1	63.1467	6.45333	122.12	43.7333	4	88.207	59.894	75.9946
3	2	0	3	1	45.5867	3.69333	98.04	26.64	4	85.158	49.875	75.9946
3	2	0	3	1	125.453	8.81333	134.227	50.7867	4	103.235	92.563	59.9957
3	2	0	3	1	172.693	6.10667	177.147	46.3867	4	106.066	82.762	57.9958
3	2	0	3	1	84.1467	3.66667	121.32	35.9333	4	98.661	89.514	71.9948
3	2	0	3	1	159.56	16.7333	233.28	100.733	4	59.894	101.711	59.9957
3	2	0	3	1	151.707	10.6533	253.56	146.027	4	103.671	86.247	41.997
3	2	0	3	1	123.827	3.38667	131.053	35.8667	4	97.572	46.826	69.995
3	2	0	3	1	84.7867	22.5867	236.213	136.533	4	102.364	97.137	35.9974
3	2	0	3	1	154.853	32.36	28.7867	34.6133	3	74.704	95.394	33.9976
3	2	0	3	1	68.7733	18.6133	12.12	12.2	2	69.912	87.336	33.9976
3	2	0	3	1	209.667	39.9467	232.613	124.12	4	64.903	105.413	45.9967
3	2	0	3	1	112.747	23.52	96.2667	92.08	4	79.713	69.695	31.9977
3	2	0	3	1	102.64	15.5733	49.6	47.1067	4	61.418	80.149	41.997
3	2	0	3	1	135.12	17.0133	29.5733	43.9467	3	83.634	81.456	45.9967
3	2	0	3	1	105.573	8.54667	237.267	156.173	4	55.102	103.235	43.9969
3	2	0	3	1	98.4667	3.90667	33.0667	132.533	1	77.317	83.416	37.9973
3	2	0	3	1	131.96	3.90667	38.96	131.533	1	74.922	74.704	37.9973
3	2	0	3	1	164.667	2.57333	153.253	202.293	1	92.128	80.584	35.9974
3	2	0	3	1	92.2267	10.3067	231.533	134.72	4	76.228	111.294	35.9974
3	2	0	3	1	137.653	6	32.7333	122.667	1	80.149	92.563	45.9967
3	2	0	3	1	70.0667	1.24	40.3867	109.667	1	89.732	86.465	49.9964
3.5	1	0	3	1	54.92	25.6	175.867	88.3067	4	84.265	79.014	19.9986
3.5	1	0	3	1	50.4667	46.4133	104.44	55.72	4	82.015	69.263	23.9983
3.5	1	0	3	1	54.1867	45.6667	89.2533	33.5067	4	95.767	88.266	23.9983
3.5	1	0	3	1	35.92	48.1467	51.48	86.0267	3	94.517	75.014	23.9983
3.5	1	0	3	1	47.7867	28.44	123.987	99.4933	4	119.522	95.017	33.9976
3.5	1	0	3	1	40.5467	21.4533	122.147	53.4	4	119.522	77.764	31.9977
3.5	1	0	3	1	56.3333	27.92	150.04	95.92	4	83.015	110.52	27.998
3.5	1	0	3	1	55.5467	22.68	143.227	70.6267	4	70.013	102.269	25.9981
3.5	1	0	3	1	37.9333	38.96	144.667	66.9333	4	59.261	102.519	31.9977
3.5	1	0	3	1	40.52	37.6667	220.133	115.467	4	49.759	99.768	41.997
3.5	1	0	3	1	65.44	12.36	122.56	52.8667	4	54.01	73.513	41.997
3.5	1	0	3	1	43.96	35.08	149.96	69.36	4	49.509	80.265	53.9961
3.5	1	0	3	1	103.493	61.3067	169.6	86.0667	4	62.011	50.509	57.9959
3.5	1	0	3	1	41.2267	10.1067	94.6	30.0533	4	82.015	51.509	59.9957
3.5	1	0	3	1	43.08	32.9333	148.773	74.9867	4	113.521	52.009	37.9973
3.5	1	0	3	1	38.0267	11.6267	91.2133	28.0267	4	113.521	66.262	49.9964
3.5	1	0	3	1	63.7733	18.96	157.56	106.213	4	131.024	82.765	49.9964
3.5	1	0	3	1	42.96	8.82667	93.0267	41.16	4	121.272	103.769	49.9964
3.5	1	0	3	1	39.4133	19.4	110.293	52.16	4	110.27	113.021	53.9961
3.5	1	0	3	1	63.84	26.4133	211.987	131.773	4	99.018	120.022	39.9971
3.5	1	0	3	1	43.1733	21.9067	121.44	75.68	4	83.265	121.772	39.9971
3.5	1	0	3	1	36.76	20.96	111.787	53.0133	4	74.013	117.021	55.996
3.5	1	0	3	1	32.68	11.28	59.4267	34.5333	4	68.763	107.27	65.9953
3.5	1	0	3	1	20.1467	16.32	67.6667	50.4	4	62.761	89.266	65.9953
3.5	1	0	3	1	95.8133	28.4267	50.28	103.787	3	71.013	88.016	43.9969
3.5	1	0	3	1	43.8533	26.4267	30	99.5067	3	106.769	85.015	25.9981
3.5	1	0	3	1	67.96	22.1733	136.773	85.2267	4	60.511	76.014	29.9979
3.5	1	0	3	1	40.52	34.5067	80.8533	90.8	3	60.511	64.262	29.9979
3.5	1	0	3	1	36.6133	15.88	101.413	43.16	4	56.26	91.517	61.9956
3.5	1	0	3	1	33.5067	18.7733	91.6667	43.0267	4	89.516	48.259	31.9977
3.5	1	0	3	1	75.6667	6.06667	57.8267	42.04	4	89.016	100.018	71.9949
3.5	1	0	3	1	44.9333	29.9733	85.5733	45.0933	4	90.767	68.763	73.9947
3.5	1	0	3	1	48.2533	8.53333	88.2267	30.9333	4	123.272	84.765	69.995
3.5	1	0	3	1	100.293	9.33333	104.813	49.5733	4	113.021	103.519	67.9951
3.5	1	0	3	1	138.613	14.9067	30.4133	37.0133	3	97.768	111.27	65.9953
3.5	1	0	3	1	18.72	7.41333	37.0533	38.48	1	79.264	86.516	71.9949
3.5	1	0	3	1	74.9467	14.4267	67.4	52.1467	4	57.01	70.263	67.9951
3.5	1	0	3	1	65.0667	41.0533	25.6267	77.3733	3	71.013	74.764	31.9977
3.5	1	0	3	1	66.2667	51.0667	43.1333	118.347	3	114.021	102.519	39.9971
3.5	1	0	3	1	91.2933	10.9867	13.2133	37.9467	1	99.268	106.519	25.9981
3.5	1	0	3	1	52.4533	17.56	11.68	41.2667	3	92.267	114.021	47.9966
3.5	1	0	3	2	67.6933	62.3733	56.4	71.9333	3	90.266	103.769	21.9984
3.5	1	0	3	2	54.52	24.3333	133.587	72.2667	4	90.767	87.766	21.9984
3.5	1	0	3	2	68.9333	7.08	156.227	77.6533	4	105.519	78.014	31.9977
3.5	1	0	3	2	65.08	28.7067	121.773	57.1467	4	118.522	97.768	35.9975
3.5	1	0	3	2	73.12	42.0267	136.133	60.4133	4	90.767	121.272	29.9979
3.5	1	0	3	2	98.3333	20.5867	104.6	63.88	4	69.513	118.022	27.998
3.5	1	0	3	2	100.013	8.96	120.667	72.5867	4	61.511	105.519	27.998
3.5	1	0	3	2	101.4	22.2	151.027	101.907	4	67.762	83.265	27.998
3.5	1	0	3	2	46.7067	13.5333	136.32	61.1467	4	49.509	93.017	31.9977
3.5	1	0	3	2	78.2	42.3733	191.32	70.2533	4	91.767	137.775	43.9969
3.5	1	0	3	2	73.08	39.2133	144.933	116.027	4	81.765	74.764	29.9979
3.5	1	0	3	2	73.6933	16.8	139.093	39.7467	4	73.263	67.762	43.9969
3.5	1	0	3	2	88.04	11.8	182.173	72.8267	4	93.267	66.762	43.9969
3.5	1	0	3	2	126.267	11.5333	220.72	66.9467	4	128.773	82.015	55.996
3.5	1	0	3	2	53.2933	10.44	56.1067	19.4533	4	127.523	113.771	63.9955
3.5	1	0	3	2	142.467	10.4933	155.347	71.1333	4	94.767	138.275	63.9955
3.5	1	0	3	2	9.30667	9.62667	31.0667	16.04	4	108.02	113.521	33.9976
3.5	1	0	3	2	66.4	40.5733	26.8	64.4667	3	73.513	98.268	23.9983
3.5	1	0	3	2	93.8133	6.76	128.187	46.1067	4	88.266	64.262	57.9959
3.5	1	0	3	2	99.72	11.6267	110.347	40.0933	4	62.761	75.764	59.9958
3.5	1	0	3	2	95.12	18.5333	79.5867	43.8933	4	52.009	95.017	59.9958
3.5	1	0	3	2	42.56	9.61333	122.933	45.44	4	51.509	117.521	39.9972
3.5	1	0	3	2	44.68	7.89333	133.587	71.4267	4	64.012	128.773	51.9963
3.5	1	0	3	2	73.68	12.8267	119.347	28.04	4	123.773	83.265	71.9949
3.5	1	0	3	2	49.72	3.30667	65.4267	23.7733	4	108.77	77.264	77.9945
3.5	1	0	3	2	24.2533	3.58667	60.8	32.9867	4	95.767	120.522	85.9939
3.5	1	0	3	2	28.16	4.64	79.4667	24.9067	4	114.771	114.521	81.9942
3.5	1	0	3	2	31.7867	2.30667	33.6533	11.88	4	74.514	115.521	85.9939
3.5	1	0	3	2	25.3333	5.98667	37.6133	24.1333	4	69.763	92.517	79.9943
3.5	1	0	3	2	64.7067	3.41333	37.5333	15.3467	4	78.514	76.014	73.9948
3.5	1	0	3	2	56.2267	5.09333	66.5467	24.64	4	63.262	123.022	71.9949
3.5	1	0	3	2	42.8533	49.6533	21.3067	77.1867	3	96.518	94.767	29.9979
3.5	1	0	3	2	128.413	43.4133	35.8933	78.6133	3	75.764	116.021	27.998
3.5	1	0	3	2	54.0267	61.8	22.2	32.4	3	92.517	79.765	35.9975
3.5	1	0	3	2	137.947	44.3067	37.8133	93.3867	3	65.512	79.765	43.9969
3.5	1	0	3	2	92.52	35.36	16.0133	47.0267	3	63.762	87.016	57.9959
3.5	1	0	3	2	93.5333	41	23.1733	77.4133	3	58.011	87.266	43.9969
3.5	1	0	3	2	77	47.9467	50.1733	62.44	3	52.76	98.018	51.9963
3.5	1	0	3	2	80.9333	54.6933	14.9067	64.36	3	53.26	105.519	37.9973
3.5	1	0	3	2	104.813	40.8533	33.5867	127.787	3	64.512	121.772	39.9972
3.5	1	0	3	2	57.8933	31.7333	18.68	58.04	3	59.261	111.52	49.9965
3.5	1	0	3	2	54.0667	32.6667	20.36	52.0267	3	80.765	80.515	39.9972
3.5	1	0	3	2	92.0667	22.2933	20.9733	38.7333	3	67.762	115.021	49.9965
3.5	1	0	3	2	49.4133	28.8	36.4533	101.013	3	73.013	123.773	35.9975
3.5	1	0	3	2	70.84	31.5733	18.5333	59	3	82.515	114.021	35.9975
3.5	1	0	3	2	72.44	15.7067	10.8667	36.8267	3	80.265	102.019	37.9973
3.5	2	0	3	1	29.0133	5.08	49.7067	18.32	4	86.266	108.77	105.992
3.5	2	0	3	1	25.64	2	92.6267	23.0267	4	96.018	92.267	105.992
3.5	2	0	3	1	35.04	16.1467	79.2	27.6667	4	105.019	81.765	105.992
3.5	2	0	3	1	38.3733	7.78667	99.36	33.4	4	98.018	65.512	103.993
3.5	2	0	3	1	23.9467	24.5467	105.373	43.5333	4	80.765	58.761	97.993
3.5	2	0	3	1	48.8	2.2	108.253	32.1067	4	71.513	74.264	105.992
3.5	2	0	3	1	29.0533	9.25333	81.92	26.8133	4	66.262	91.267	107.992
3.5	2	0	3	1	38.5333	26.56	115.32	44.2933	4	109.52	55.76	91.9934
3.5	2	0	3	1	12.52	11.6667	107.013	60.9467	4	124.023	64.262	81.9941
3.5	2	0	3	1	32.68	5.18667	85.72	29.4133	4	131.774	83.515	89.9936
3.5	2	0	3	1	28.0533	2.57333	29.8933	16.96	4	111.02	115.771	99.9928
3.5	2	0	3	1	37.1867	2.96	30.8267	28.7733	4	104.269	132.524	93.9933
3.5	2	0	3	1	24.0533	8.62667	69.0133	31.8	4	66.512	129.524	87.9937
3.5	2	0	3	1	59.3867	2.98667	99.2533	21.1067	4	51.759	112.27	93.9933
3.5	2	0	3	1	42.7333	9.72	110.973	52.5733	4	45.258	94.017	93.9933
3.5	2	0	3	1	59.8933	3.96	108.787	37.04	4	44.758	78.764	91.9934
3.5	2	0	3	1	49.36	11.12	107.413	31.68	4	56.76	59.261	91.9934
3.5	2	0	3	1	64.8667	7.74667	191.747	69.4	4	77.514	42.758	79.9943
3.5	2	0	3	1	41.2533	26.88	132.52	50.1733	4	97.768	44.258	79.9943
3.5	2	0	3	1	58.2133	57.4667	217.293	95.16	4	105.019	43.258	61.9956
3.5	2	0	3	1	44.04	22.6133	178.627	67.36	4	122.022	55.51	63.9954
3.5	2	0	3	1	68.1067	31.32	181.947	69.8133	4	134.024	70.513	63.9954
3.5	2	0	3	1	64.0133	12.8133	198.267	72.3333	4	139.775	87.516	49.9964
3.5	2	0	3	1	95.6267	48.4933	92.3733	143.16	3	138.025	98.518	51.9963
3.5	2	0	3	1	70.9867	46.64	205.827	112.68	4	146.777	103.519	51.9963
3.5	2	0	3	1	60.12	22.24	204.693	126.44	4	139.525	110.77	35.9974
3.5	2	0	3	1	53.1733	16.3333	188.16	88.7467	4	143.776	120.272	39.9971
3.5	2	0	3	1	64.8667	42.3867	195.493	132.48	4	132.774	133.774	31.9977
3.5	2	0	3	1	59.6	14.5733	189.36	90.88	4	137.275	139.275	45.9967
3.5	2	0	3	1	51.6667	42.52	171.827	135.76	4	120.272	148.777	43.9969
3.5	2	0	3	1	50.2133	45.2	179.24	124.387	4	94.267	152.778	47.9966
3.5	2	0	3	1	53.56	16.8267	111	57.8	4	105.269	151.528	65.9953
3.5	2	0	3	1	90.68	14.9733	212.933	135.747	4	82.515	147.527	61.9956
3.5	2	0	3	1	52.9733	18.72	171.093	105.453	4	79.514	140.526	39.9971
3.5	2	0	3	1	53.6933	19.48	152.32	36.48	4	75.764	120.772	25.9981
3.5	2	0	3	1	39.6	32.6533	87.32	122.213	3	75.514	128.023	37.9973
3.5	2	0	3	1	92.8933	9.18667	220.4	102.267	4	64.262	141.776	57.9959
3.5	2	0	3	1	61.4	4.37333	173.733	68.96	4	54.51	128.023	43.9969
3.5	2	0	3	1	75.5867	18.76	211.533	102.36	4	55.01	134.525	75.9946
3.5	2	0	3	1	64.16	9.64	203.027	68.9867	4	39.257	122.022	73.9947
3.5	2	0	3	1	76.7733	29.28	188.48	38.0933	4	39.757	113.771	51.9963
3.5	2	0	3	1	69.0667	18.6133	173.76	82.16	4	34.756	103.269	69.995
3.5	2	0	3	1	69.0533	48.96	195.76	46.5333	4	37.257	94.517	51.9963
3.5	2	0	3	1	35.4267	12.92	150.413	71.7333	4	43.758	84.765	37.9973
3.5	2	0	3	1	60.8667	36.72	171.453	57.1067	4	34.506	84.015	71.9948
3.5	2	0	3	1	66.1733	12.76	229.933	76.3067	4	39.757	71.513	57.9959
3.5	2	0	3	1	58.2933	10.2133	237.307	98.68	4	48.009	54.51	61.9956
3.5	2	0	3	1	69.92	10.6667	198.24	48	4	64.512	45.008	53.9961
3.5	2	0	3	1	62.8533	32.0267	216.013	86.24	4	86.516	42.758	55.996
3.5	2	0	3	1	39.4667	25.4533	184.213	71.3467	4	102.019	51.259	45.9967
3.5	2	0	3	1	39.6933	26.3733	173.787	64.4	4	114.771	61.511	37.9973
3.5	2	0	3	1	42.32	19.8133	127.413	43.6533	4	92.017	59.761	35.9974
3.5	2	0	3	1	58.9067	5.98667	140.32	30.56	4	83.015	77.764	29.9979
3.5	2	0	3	1	68.36	33.8	132.92	25.5333	4	72.263	93.767	31.9977
3.5	2	0	3	1	43.7333	6.34667	166.933	48.52	4	100.268	96.768	25.9981
3.5	2	0	3	1	39.4133	14.24	158.293	51.76	4	116.021	89.516	27.998
3.5	2	0	3	1	67.8933	21.1333	161.613	60.28	4	122.522	108.02	25.9981
3.5	2	0	3	1	62.7333	13.56	174.013	61.7067	4	101.018	132.774	25.9981
3.5	2	0	3	1	49.4667	16.5067	185.72	149.44	4	116.271	142.026	29.9979
3.5	2	0	3	1	37.0267	35.1867	59.08	147.093	3	122.522	127.273	27.998
3.5	2	0	3	1	31.7333	40.6933	68.4667	170.227	3	121.522	116.521	29.9979
3.5	2	0	3	1	24.4	92.8133	41.56	161.16	3	106.269	106.769	27.998
3.5	2	0	3	1	32.6267	79.48	38.1467	168.04	3	92.017	108.77	25.9981
3.5	2	0	3	1	33.9733	52.7067	30.56	127.787	3	90.767	132.774	27.998
3.5	2	0	3	1	13.1067	4.78667	22.88	13.64	4	122.022	101.519	91.9934
3.5	2	0	3	1	58.24	6.37333	53.9067	28.4	4	127.273	124.023	83.994
3.5	2	0	3	1	71.7733	8.32	54.04	46.6667	4	120.022	134.274	77.9944
3.5	2	0	3	1	80.3333	5.10667	88.4667	39.0933	4	87.516	143.776	81.9941
3.5	2	0	3	1	35.5867	27.4533	25	95.3867	3	108.27	117.521	31.9977
3.5	2	0	3	1	21.16	38.9467	22.92	85.4933	3	99.768	116.771	27.998
3.5	2	0	3	1	27.64	40.5733	20.6	104.347	3	87.516	120.272	25.9981
3.5	2	0	3	1	26	38.5467	29.2	125.88	3	111.27	128.523	25.9981
3.5	2	0	3	1	51.3067	8.68	127.56	45.1067	4	126.273	72.513	37.9973
3.5	2	0	3	1	37.7067	11.7867	152.48	61.12	4	59.261	62.761	37.9973
3.5	2	0	3	1	115.053	12.0133	75.3333	53.8267	4	139.775	108.27	71.9948
3.5	2	0	3	1	112.187	20.92	109.173	68.56	4	143.276	120.522	65.9953
3.5	2	0	3	1	78.4133	9.58667	120.547	42.44	4	142.276	131.524	63.9954
3.5	2	0	3	1	51.3733	20	152.36	83.5867	4	128.023	147.527	57.9959
3.5	2	0	3	1	61.0933	32.4133	165.48	55.5733	4	63.762	111.02	29.9979
3.5	2	0	3	1	41.1067	34.4533	25.84	85.5333	3	131.274	118.772	35.9974
3.5	2	0	3	1	59.6667	135.973	31.08	110.547	3	106.769	145.026	35.9974
3.5	2	0	3	1	119.933	42.6933	32.3333	67.88	3	93.517	141.526	57.9959
3.5	2	0	3	1	79.56	29.12	15.1867	30.9467	3	83.265	136.775	51.9963
3.5	2	0	3	1	145.84	46.3333	62.6933	125.613	3	131.524	136.275	51.9963
3.5	2	0	3	1	66.0267	42.96	72	168.52	3	127.773	138.275	41.997
3.5	2	0	3	1	109.787	33.7867	55.9867	142.627	3	139.025	121.022	51.9963
4.5	1	0	3	1	90.2933	7.4	119.573	175.787	1	102.644	94.805	37.9973
4.5	1	0	3	1	38.1067	1.84	85.28	74.9467	4	97.5	80.597	37.9973
4.5	1	0	3	1	53.5467	2.36	102.44	68.0667	4	92.845	117.588	41.997
4.5	1	0	3	1	45.12	1.52	87.4133	72.4533	4	75.452	105.339	37.9973
4.5	1	0	3	1	35.0533	5.06667	67.0267	33.1333	4	73.982	81.331	37.9973
4.5	1	0	3	1	48.6267	2.77333	102.973	47.8933	4	51.445	98.725	45.9967
4.5	1	0	3	1	48.36	3.36	113.293	60.12	4	55.364	73.492	47.9966
4.5	1	0	3	1	59.6667	6.09333	113.893	60.4933	4	71.288	62.713	47.9966
4.5	1	0	3	1	77.1467	6.72	127.12	77.28	4	91.13	64.183	43.9969
4.5	1	0	3	1	64.4933	11.68	108.24	83.56	4	121.262	86.476	41.997
4.5	1	0	3	1	110.027	6.02667	168.92	118.493	4	112.198	118.078	47.9966
4.5	1	0	3	1	72.1867	5.73333	127.573	61.7067	4	102.154	137.431	59.9957
4.5	1	0	3	1	81.1733	4.53333	139.027	75.6	4	82.556	136.451	53.9962
4.5	1	0	3	1	45.6667	7.81333	103.24	85.8133	4	63.448	137.676	53.9962
4.5	1	0	3	1	95.9067	4.73333	53.3733	12.7467	4	49.975	121.997	53.9962
4.5	1	0	3	1	75.9733	15.0133	122.76	50.56	4	32.092	95.54	65.9953
4.5	1	0	3	1	93.4133	4.6	135.707	75.44	4	39.686	70.063	63.9954
4.5	1	0	3	1	114.76	5.54667	140.64	86.6267	4	57.814	49.485	65.9953
4.5	1	0	3	1	59.84	10.68	122.64	46.2	4	90.885	41.891	67.9952
4.5	1	0	3	1	103.067	14.5733	164.107	70.04	4	107.789	47.28	69.995
4.5	1	0	3	1	74.64	3.18667	150.093	81.88	4	125.672	60.264	69.995
4.5	1	0	3	1	69.4	8.54667	149.227	65.36	4	133.021	71.043	79.9943
4.5	1	0	3	1	88.48	15.4933	112.64	52.72	4	137.676	93.335	67.9952
4.5	1	0	3	1	87.72	6	131.92	90.8267	4	126.407	128.856	67.9952
4.5	1	0	3	1	56.0933	4.72	81.4	37.9467	4	117.833	126.897	59.9957
4.5	1	0	3	1	80.1467	11.64	123.027	86.52	4	114.893	141.595	81.9942
4.5	1	0	3	1	91.9467	7	130.147	66.6667	4	85.496	146.74	71.9949
4.5	1	0	3	1	65.9333	12.1067	104.533	55.9067	4	51.445	136.206	71.9949
4.5	1	0	3	1	86.1733	13.7467	135.347	42.0133	4	36.746	122.732	77.9944
4.5	1	0	3	1	72.24	6.86667	142.72	43.3733	4	28.907	88.681	81.9942
4.5	1	0	3	1	92.3067	5.44	128.027	30.0267	4	34.541	70.063	85.9939
4.5	1	0	3	1	60.7867	3.56	37.5467	10.7733	4	46.79	59.529	81.9942
4.5	1	0	3	1	60.1333	26.8133	124.2	48.6267	4	75.697	41.646	81.9942
4.5	1	0	3	1	54.5733	8.6	95.7067	44.8667	4	73.737	50.22	55.996
4.5	1	0	3	1	46.7067	10.3067	103.893	47.56	4	95.295	51.445	53.9962
4.5	1	0	3	1	67.24	3.02667	133.16	76.7067	4	108.034	58.304	53.9962
4.5	1	0	3	1	56.5867	4.62667	124.76	80.2267	4	123.222	76.187	53.9962
4.5	1	0	3	1	48.3867	21.7733	51.9333	54.4267	3	136.206	113.423	67.9952
4.5	1	0	3	1	70.16	5.50667	117.693	39.8667	4	131.551	76.432	99.9929
4.5	1	0	3	1	51.36	5.25333	49.4267	31.4	4	86.231	142.575	99.9929
4.5	1	0	3	1	39.3867	8.04	61.6267	30.9467	4	78.392	131.306	113.992
4.5	1	0	3	1	60.7067	5.88	60.76	19.12	4	59.039	119.792	109.992
4.5	1	0	3	1	64.48	2.57333	35.12	6.62667	4	46.79	123.957	101.993
4.5	1	0	3	1	34.9733	9.38667	52.1733	22.8267	4	71.777	98.725	123.991
4.5	1	0	3	1	21.6667	4.98667	32.6667	10.8667	4	94.07	110.483	123.991
4.5	1	0	3	1	49.36	3.72	29.0267	8.2	4	100.194	116.608	121.991
4.5	1	0	3	1	29.2	1.36	29.6267	11.32	4	117.833	91.865	119.991
4.5	1	0	3	1	33.04	3.73333	69.5733	15.24	4	84.761	74.227	121.991
4.5	1	0	3	1	37.2667	3.02667	71.6133	14.4933	4	106.809	71.288	113.992
4.5	1	0	3	1	45.2667	1.97333	70.3333	22.5867	4	71.043	57.569	107.992
4.5	1	0	3	1	48.4667	2.46667	70.7333	20.6933	4	50.71	89.416	115.992
4.5	1	0	3	1	43.5333	3.17333	43.0933	18.2133	4	118.568	123.467	103.993
4.5	1	0	3	1	88.44	4.64	107.293	52.7467	4	129.346	126.162	83.994
4.5	1	0	3	1	47.6533	2.68	54.7733	18.6133	4	91.375	48.995	95.9932
4.5	1	0	3	1	61.5867	14.92	106.96	68.8	4	61.244	142.575	85.9939
4.5	1	0	3	1	74.24	8.34667	57.1733	15.1867	4	35.766	101.174	93.9933
4.5	1	0	3	1	48.3867	1.6	31.9333	7.14667	4	117.343	56.834	97.993
4.5	1	0	3	1	86.84	4.92	46.0667	25.3333	4	134.246	108.034	97.993
4.5	1	0	3	1	114.853	8.17333	99.28	41.6533	4	137.186	95.54	83.994
4.5	1	0	3	1	88.2133	48.68	13.9867	62.9733	3	99.46	104.604	45.9967
4.5	1	0	3	1	74.5467	74.32	6.09333	14.3867	2	112.688	92.355	43.9969
4.5	1	0	3	1	90.7067	40.9333	13.5067	68.9333	3	116.118	106.074	45.9967
4.5	1	0	3	1	90.0533	74.0667	5.92	12.32	2	125.182	114.893	53.9962
4.5	1	0	3	1	145.053	46.04	39.7067	30.56	3	124.937	87.946	53.9962
4.5	1	0	3	1	102.573	6.62667	22.6267	180.227	1	107.054	105.829	45.9967
4.5	1	0	3	1	62.7333	4.42667	145.44	123.933	4	128.122	120.772	51.9963
4.5	1	0	3	1	61.1067	16.6933	17.7067	100.947	3	128.856	96.765	51.9963
4.5	1	0	3	1	70.8667	31.2533	18.3867	107.4	3	119.302	95.05	43.9969
4.5	1	0	3	3	20.3467	1.44	60.5067	23.0267	4	107.012	90.722	3.99972
4.5	1	0	3	3	27.2533	1.36	64.5867	23.9333	4	92.226	72.177	3.99972
4.5	1	0	3	3	26.4533	1.96	89.7467	54.8933	4	84.707	65.661	3.99972
4.5	1	0	3	3	38.2933	3.92	79.5733	31.5333	4	106.761	69.169	3.99972
4.5	1	0	3	3	36.7733	5.01333	85.1333	30.56	4	136.334	79.946	19.9986
4.5	1	0	3	3	56.5467	3.86667	89.8267	41.6267	4	128.816	63.656	17.9987
4.5	1	0	3	3	45.2267	6.14667	94.6667	35.7467	4	126.059	106.761	19.9986
4.5	1	0	3	3	32.5067	1.92	66.0933	16.3867	4	88.968	114.531	17.9987
4.5	1	0	3	3	31.2267	2.96	99.24	37.7733	4	67.916	105.007	17.9987
4.5	1	0	3	3	72.3733	2.04	49.56	11.9867	4	60.649	80.447	19.9986
4.5	1	0	3	3	37.4533	13.3467	98.4533	31.6267	4	63.907	53.631	23.9983
4.5	1	0	3	3	58.76	6.69333	96.0933	39.8133	4	84.206	43.857	23.9983
4.5	1	0	3	3	86.0267	4.50667	117.653	45.3333	4	114.029	43.356	27.998
4.5	1	0	3	3	73.36	34.6	143.867	43.9733	4	102	129.066	31.9977
4.5	1	0	3	3	86.3733	4.49333	148.267	29.5067	4	81.951	128.816	45.9967
4.5	1	0	3	3	59.7733	15.8267	155.453	48.0533	4	67.415	121.798	45.9967
4.5	1	0	3	3	59.8267	5.33333	163.627	31.0133	4	53.631	107.263	45.9967
4.5	1	0	3	3	80.52	10.6133	190.627	48.92	4	47.366	86.211	47.9966
4.5	1	0	3	3	52.0533	9.49333	119.613	34.7467	4	50.875	57.892	55.996
4.5	1	0	3	3	142.64	11.68	118.453	47.1333	4	66.162	39.597	57.9959
4.5	1	0	3	3	34.9467	3.49333	42.48	17.36	4	75.685	43.106	71.9949
4.5	1	0	3	3	24.12	1.52	64.32	10.68	4	65.41	67.415	79.9943
4.5	1	0	3	3	26.72	2.49333	50.6133	11.3067	4	69.169	87.965	85.9939
4.5	1	0	3	3	25.52	1.68	65.6133	10.3467	4	78.943	109.769	81.9942
4.5	1	0	3	3	24.04	7.02667	56.6933	12.2667	4	97.99	110.521	83.994
4.5	1	0	3	3	19.9333	6.88	80.6267	12.1867	4	104.506	97.99	85.9939
4.5	1	0	3	3	13.0933	3.06667	47.84	10.8267	4	94.231	81.951	85.9939
4.5	1	0	3	3	19.8267	2	50.12	12.0933	4	82.452	69.671	85.9939
4.5	1	0	3	3	19.24	1.12	16.6133	5.02667	4	102.501	61.902	85.9939
4.5	1	0	3	3	39.9467	11.8	98.92	17.1333	4	118.039	98.992	81.9942
4.5	1	0	3	3	31.4267	8.05333	56.6267	12.1467	4	117.037	112.526	81.9942
4.5	1	0	3	3	37.08	7.57333	62.48	17.8	4	125.056	114.531	69.995
4.5	1	0	3	3	61.88	5.52	108.88	30.2667	4	135.833	109.017	59.9957
4.5	1	0	3	3	60.8933	2.32	104.627	38.1467	4	145.857	70.172	43.9969
4.5	1	0	3	3	80.1467	6.89333	129.92	42.4133	4	144.354	80.948	35.9974
4.5	1	0	3	3	50.68	10.5733	91.5733	34.0267	4	109.769	128.064	55.996
4.5	1	0	3	3	51.6	12.9067	96.32	33.32	4	95.484	123.803	67.9952
4.5	1	0	3	3	102.013	17.68	178.093	56.6267	4	97.739	131.823	51.9963
4.5	1	0	3	3	21.9867	1.69333	33.6133	8.10667	4	97.99	47.867	85.9939
4.5	1	0	3	3	29.3067	4.88	28.96	7.90667	4	116.285	55.135	83.994
4.5	1	0	3	3	28.1333	7.88	38.2	16.2667	4	135.331	78.192	75.9946
4.5	1	0	3	3	31.52	8.56	50.2	17.2667	4	131.322	95.985	69.995
4.5	1	0	3	3	23.0667	5.98667	55.6267	11.7067	4	119.793	86.462	83.994
4.5	1	0	3	3	60.6133	23.1867	90.68	47.8533	4	141.847	91.474	33.9976
4.5	1	0	3	3	48.7867	4.4	44.88	7.48	4	125.808	123.302	39.9972
4.5	1	0	3	3	70.36	7.48	81.6667	23	4	80.698	124.555	63.9954
4.5	1	0	3	3	24.3867	8.04	52.88	18.68	4	63.155	113.779	65.9953
4.5	1	0	3	3	36.4933	3.32	81.0533	22.1067	4	57.641	100.997	69.995
4.5	1	0	3	3	29.2533	2.37333	91.32	33.5333	4	53.13	80.196	65.9953
4.5	1	0	3	3	76.6667	5.02667	122.747	48.4533	4	134.83	53.13	41.997
4.5	1	0	3	3	175.187	4.14667	74.2533	22.04	4	110.521	44.108	43.9969
4.5	1	0	3	3	122.653	15.9467	102.213	40.5333	4	126.309	43.607	47.9966
4.5	1	0	3	3	78.2667	4.49333	146.267	71.1067	4	100.997	34.083	43.9969
4.5	1	0	3	3	53.9467	14.4	34.8667	79.5333	1	119.042	76.187	13.999
4.5	1	0	3	3	56.2933	9.8	148.213	66.24	4	77.44	35.086	37.9973
4.5	1	0	3	3	96.16	8.25333	91.8667	24.6	4	80.196	32.079	61.9956
4.5	1	0	3	3	46.2133	8.13333	118.587	33.1333	4	140.594	106.01	39.9972
4.5	1	0	3	3	20.36	2.57333	61.6133	16.1467	4	93.73	37.091	71.9949
4.5	1	0	3	3	85.6667	3.48	95.8	28.1467	4	136.334	54.133	59.9957
4.5	1	0	3	3	161.16	12.3733	33.3333	115.04	1	106.511	60.899	25.9981
4.5	1	0	3	3	149.813	12.9733	34.6533	104.733	1	118.791	68.167	23.9983
4.5	1	0	3	3	127.4	22.6133	42.7333	92.4133	3	99.494	64.909	23.9983
4.5	1	0	3	3	50.3733	15.6	23.8933	80.3333	3	95.484	43.356	23.9983
4.5	1	0	3	3	103.52	41.8667	16.96	44.72	3	94.231	54.634	23.9983
4.5	1	0	3	3	86.36	31.5867	119.227	61.96	4	130.319	107.012	31.9977
4.5	1	0	3	3	93.7333	40.44	19.6	36.9467	3	100.246	43.356	31.9977
4.5	1	0	3	3	85.9067	37.8	34.2267	32.6267	3	126.309	46.113	37.9973
4.5	1	0	3	3	142.56	7.21333	59.0667	82.7467	1	119.292	42.103	41.997
4.5	1	0	3	3	84.68	5.56	61.4533	90.3467	1	129.818	67.666	25.9981
4.5	1	0	3	4	23.28	6	57.84	26	4	82.703	84.206	3.99972
4.5	1	0	3	4	28.8	5.45333	55.4533	15	4	85.71	67.415	3.99972
4.5	1	0	3	4	27.0533	3.26667	63.6267	17.36	4	104.757	64.408	3.99972
4.5	1	0	3	4	32.1733	6.56	79.3467	14.6	4	94.732	89.72	3.99972
4.5	1	0	3	4	30.7467	9.61333	77.8667	35.7333	4	81.951	101.499	7.99943
4.5	1	0	3	4	30.3067	6.48	72.3333	10.48	4	99.995	103.002	9.99929
4.5	1	0	3	4	33.3867	2.66667	63.48	19.4933	4	114.781	98.241	9.99929
4.5	1	0	3	4	34.4667	2.74667	58.9867	17.44	4	126.059	80.948	13.999
4.5	1	0	3	4	74.8	2.66667	48.2133	6.36	4	120.796	52.88	17.9987
4.5	1	0	3	4	30.6133	18.68	72.3067	27.9467	4	104.506	46.364	9.99929
4.5	1	0	3	4	54.96	3.76	50.1067	6.88	4	84.958	49.622	9.99929
4.5	1	0	3	4	56.72	3.17333	62.28	11.48	4	65.41	68.668	9.99929
4.5	1	0	3	4	35.32	14.3867	86	33.9733	4	58.142	90.221	11.9991
4.5	1	0	3	4	41.96	12.6933	92.2267	26.32	4	68.167	50.123	11.9991
4.5	1	0	3	4	41.8133	19.6667	129.147	52.8933	4	68.167	39.597	17.9987
4.5	1	0	3	4	49.04	31.2133	131.387	47.84	4	88.467	34.083	19.9986
4.5	1	0	3	4	53.08	16.7067	164.213	53.4	4	108.265	33.332	23.9983
4.5	1	0	3	4	55.7733	6.94667	118.16	21.16	4	91.223	114.781	17.9987
4.5	1	0	3	4	45.0133	18.0667	149.533	33.68	4	111.273	114.531	23.9983
4.5	1	0	3	4	38.4533	19.16	108.56	25.9867	4	128.565	99.744	19.9986
4.5	1	0	3	4	40.96	8.48	96.32	33.0667	4	138.088	88.216	23.9983
4.5	1	0	3	4	101.08	28.5333	178.707	49.1733	4	138.84	81.7	45.9967
4.5	1	0	3	4	72.2533	4.09333	135.373	40.44	4	137.838	70.172	27.998
4.5	1	0	3	4	53.7867	6.42667	121.213	39.24	4	133.577	51.376	31.9977
4.5	1	0	3	4	92.9067	4.61333	71.1067	13.6667	4	121.046	38.344	41.997
4.5	1	0	3	4	69.3067	12.9333	138.72	59.7067	4	103.504	29.071	39.9972
4.5	1	0	3	4	88.52	9.44	128.04	62.04	4	82.953	29.071	47.9966
4.5	1	0	3	4	27.4267	10.8	62.6	29.64	4	82.953	68.418	73.9947
4.5	1	0	3	4	24.4667	7.86667	54.68	27.8533	4	91.223	51.626	73.9947
4.5	1	0	3	4	28.96	1.16	70.3733	16.4267	4	105.759	51.626	71.9949
4.5	1	0	3	4	11.64	2.56	43.9467	10.2267	4	121.297	69.42	67.9952
4.5	1	0	3	4	41.3333	0.8	41.8	9.38667	4	123.302	81.449	67.9952
4.5	1	0	3	4	42.2267	9.85333	79.5467	25.9467	4	118.791	102.501	57.9959
4.5	1	0	3	4	25.1467	3.34667	60.84	20.1467	4	106.01	108.516	57.9959
4.5	1	0	3	4	37.0267	5.73333	68.1067	30.5867	4	89.97	110.27	59.9957
4.5	1	0	3	4	93.7733	17.24	171.147	57.2267	4	94.481	120.796	39.9972
4.5	1	0	3	4	58.0667	21.2133	104.573	31.3067	4	79.946	118.039	31.9977
4.5	1	0	3	4	76.7333	36.4133	137.6	40.0933	4	69.169	110.771	21.9984
4.5	1	0	3	4	84.2	44.5467	111.04	59.3733	4	68.919	116.034	35.9974
4.5	1	0	3	4	71.1067	7.18667	120.773	57.0667	4	52.88	105.007	45.9967
4.5	1	0	3	4	39.12	9.72	162.24	76.16	4	43.857	89.97	33.9976
4.5	1	0	3	4	48.64	14.3733	147.627	50.7467	4	41.853	80.447	49.9964
4.5	1	0	3	4	66.5733	54.24	170.973	101.92	4	43.356	66.663	25.9981
4.5	1	0	3	4	69.1333	5.38667	143.533	46.8533	4	44.108	55.386	45.9967
4.5	1	0	3	4	35.1067	4.12	119.627	34.6267	4	55.636	46.865	19.9986
4.5	1	0	3	4	62.3867	5.18667	113.587	47.4267	4	56.639	41.602	49.9964
4.5	1	0	3	4	51.36	14.4267	130.16	45.88	4	87.715	29.322	25.9981
4.5	1	0	3	4	70.8267	36.5067	123.613	96.1067	4	53.631	101.749	29.9979
4.5	1	0	3	4	96.3067	23.9333	172.093	41.9067	4	127.061	106.761	41.997
4.5	1	0	3	4	37.4133	2.37333	85.6	21.2	4	137.587	63.907	49.9964
4.5	1	0	3	4	27.0667	2.34667	88.2	30.32	4	112.024	38.093	53.9962
4.5	1	0	3	4	23.1067	6.94667	59.3067	22.4267	4	79.946	82.953	75.9946
4.5	1	0	3	4	24.1867	8.93333	54.1333	25.4133	4	72.929	64.909	75.9946
4.5	1	0	3	4	58.72	10.56	69.9067	29.76	4	64.658	55.636	71.9949
4.5	1	0	3	4	37.4533	4.70667	73.6267	29.7467	4	66.413	44.86	65.9953
4.5	1	0	3	4	53.1867	3.2	93.5733	42.5867	4	66.663	95.985	67.9952
4.5	1	0	3	4	105.987	21.1733	99.08	59.4667	4	58.142	91.223	67.9952
4.5	1	0	3	4	44.8267	4.98667	80.56	25.8267	4	90.722	33.833	61.9956
4.5	1	0	3	4	144.28	16.2533	85.2133	54.3867	4	68.919	112.526	53.9962
4.5	1	0	3	4	139.76	28.1467	108.107	30.4933	4	93.228	117.538	53.9962
4.5	1	0	3	4	157.653	49.36	39.24	84.1467	3	47.115	65.16	43.9969
4.5	1	0	3	4	64.1733	17.0933	21.3867	51.5467	3	49.371	81.951	43.9969
4.5	1	0	3	4	57.1467	28.08	12.7067	5.98667	2	52.378	52.629	49.9964
4.5	1	0	3	4	80.4667	22.7333	14.48	31.56	3	53.882	58.894	59.9957
4.5	1	0	3	4	56	30.6667	49.88	33.8133	4	62.152	52.629	61.9956
4.5	1	0	3	4	90.16	28.92	21.5067	32.5333	3	61.4	82.703	63.9954
4.5	1	0	3	4	55.3333	10.9067	7.42667	4.24	2	68.668	75.435	63.9954
4.5	1	0	3	4	97.72	6.88	17.92	54.3067	1	64.157	72.929	57.9959
4.5	1	0	3	4	79.7067	3.68	18.2133	51.5067	1	51.626	75.936	47.9966
4.5	1	0	3	4	42.68	4.68	21.7467	56.5733	1	49.371	86.963	47.9966
4.5	1	0	3	4	55.6667	4.66667	19.5333	64.96	1	58.142	64.408	49.9964
4.5	1	0	3	4	41.1733	8.41333	20.7867	72.92	1	51.626	59.395	45.9967
4.5	1	0	3	5	43.4267	2.38667	96.0667	30.12	4	95.985	72.678	5.99957
4.5	1	0	3	5	71.76	5.2	104.16	74.8667	4	89.219	86.462	5.99957
4.5	1	0	3	5	52.2133	2.8	113.16	31.08	4	107.513	91.725	5.99957
4.5	1	0	3	5	28.8133	2.48	96.16	37.4933	4	119.042	76.187	5.99957
4.5	1	0	3	5	63.4533	7.12	103.507	86.7867	4	96.236	104.506	5.99957
4.5	1	0	3	5	47.68	2.81333	112.213	42.9333	4	115.533	106.26	11.9991
4.5	1	0	3	5	29.6267	3.08	89.6533	25.16	4	129.066	88.467	11.9991
4.5	1	0	3	5	35.2533	2.64	115.333	42.9067	4	120.545	58.894	9.99928
4.5	1	0	3	5	41.6933	7.56	117.053	26.16	4	111.022	43.607	19.9986
4.5	1	0	3	5	54.2	5.13333	136.933	26.4267	4	88.968	45.862	17.9987
4.5	1	0	3	5	45.16	1.6	91.4267	13.5867	4	70.422	59.897	15.9989
4.5	1	0	3	5	39.8	3.25333	111.333	44.24	4	70.673	74.934	5.99957
4.5	1	0	3	5	80.16	4.81333	165.88	36.6533	4	129.818	108.015	25.9981
4.5	1	0	3	5	38.6133	2.65333	106.267	38.6	4	110.521	120.545	23.9983
4.5	1	0	3	5	82.8667	3.86667	127.013	55.92	4	98.742	119.042	21.9984
4.5	1	0	3	5	74.92	4.89333	115.973	42.32	4	69.921	113.779	21.9984
4.5	1	0	3	5	40.28	3.13333	112.653	40.5333	4	58.894	106.511	27.998
4.5	1	0	3	5	76.1867	7.06667	127.6	67.4	4	64.909	114.531	33.9976
4.5	1	0	3	5	41.9467	3.77333	152.92	71.7867	4	50.875	98.992	37.9973
4.5	1	0	3	5	32.4267	7.32	134.413	51.0133	4	50.123	86.963	25.9981
4.5	1	0	3	5	32.36	5.86667	134.4	64.76	4	59.145	87.214	15.9989
4.5	1	0	3	5	40.1733	5.88	101.187	45.12	4	57.641	75.936	21.9984
4.5	1	0	3	5	59.24	12.84	174.053	76.0133	4	48.87	76.187	35.9974
4.5	1	0	3	5	45.3867	10.28	167.853	59.68	4	49.371	67.666	35.9974
4.5	1	0	3	5	67.4	4.86667	168.96	43.3867	4	56.388	59.646	27.998
4.5	1	0	3	5	50.88	3.76	142.627	47.5733	4	101.499	125.558	35.9974
4.5	1	0	3	5	41.0133	4.24	120.947	30.28	4	124.555	116.285	35.9974
4.5	1	0	3	5	50.3467	10.3067	135.96	34.7333	4	134.83	105.007	49.9964
4.5	1	0	3	5	89.2133	12.16	199.88	55.7333	4	143.101	94.231	37.9973
4.5	1	0	3	5	75.9333	6.52	103.52	24.9467	4	141.847	88.968	55.996
4.5	1	0	3	5	88.7333	14.0133	168.28	32.9067	4	148.113	76.437	53.9961
4.5	1	0	3	5	24.4933	3.32	72.84	19.6533	4	138.84	75.184	65.9953
4.5	1	0	3	5	84.08	5.96	179.08	53.28	4	147.11	63.656	41.997
4.5	1	0	3	5	46.2	5.2	126.613	43.6267	4	142.599	60.398	27.998
4.5	1	0	3	5	82.4667	7.10667	113.947	32.1733	4	143.101	55.887	55.996
4.5	1	0	3	5	27.72	4.22667	72.84	16.5467	4	130.57	49.12	63.9954
4.5	1	0	3	5	21.3067	1.68	70	26.88	4	124.555	54.383	71.9948
4.5	1	0	3	5	31	2.81333	75	20.8133	4	126.811	74.182	75.9946
4.5	1	0	3	5	17.1333	2.72	63.2133	19.7333	4	118.791	90.722	75.9946
4.5	1	0	3	5	11.96	1.93333	56.4	18.4	4	111.774	80.698	79.9943
4.5	1	0	3	5	31.9067	4.42667	45.4933	8.92	4	102.25	107.513	75.9946
4.5	1	0	3	5	18.1733	5.4	36.9067	11.7867	4	87.214	70.924	79.9943
4.5	1	0	3	5	24.4133	1.2	50.6	15.6533	4	92.727	52.629	79.9943
4.5	1	0	3	5	39.92	1.44	65.7467	25.2267	4	97.99	41.602	69.995
4.5	1	0	3	5	97.4533	7.90667	149.613	39.8667	4	132.825	40.85	49.9964
4.5	1	0	3	5	85.8267	16.5867	155.333	38.28	4	123.302	39.096	35.9974
4.5	1	0	3	5	84.7867	10.6667	183.6	45.2933	4	113.528	34.334	53.9961
4.5	1	0	3	5	129.52	2.93333	102.68	35.5067	4	98.241	34.585	55.996
4.5	1	0	3	5	59.9867	6.64	145.093	50.36	4	98.742	35.086	31.9977
4.5	1	0	3	5	105.867	7.41333	180.533	40.6133	4	83.204	35.838	43.9969
4.5	1	0	3	5	39.48	7.16	136.4	37.64	4	69.169	40.599	43.9969
4.5	1	0	3	5	75.16	4.08	117.933	31.24	4	56.639	53.882	55.996
4.5	1	0	3	5	42.12	7.29333	94	36.32	4	57.14	77.69	63.9954
4.5	1	0	3	5	29.3867	8.17333	70.16	17.0933	4	64.408	65.911	71.9948
4.5	1	0	3	5	27.44	1.6	76.1067	30.4267	4	55.636	94.732	57.9958
4.5	1	0	3	5	62.4667	4.09333	102.493	32.1733	4	65.911	105.508	59.9957
4.5	1	0	3	5	27.12	3.2	42.56	16.6933	4	72.678	97.238	75.9946
4.5	1	0	3	5	25.3867	3.78667	72.7333	21.5867	4	112.275	60.147	81.9941
4.5	1	0	3	5	15.56	1.92	71.12	19.1333	4	76.688	44.609	65.9953
4.5	1	0	3	5	79.2	7.05333	125.827	49.2667	4	73.931	121.798	35.9974
4.5	1	0	3	5	75.56	3.92	92.1867	32.0267	4	86.211	117.538	21.9984
4.5	1	0	3	5	32.1067	1.8	63.7867	16.7467	4	122.55	107.764	57.9958
4.5	1	0	3	5	58.2533	2.04	69.0533	14.12	4	114.531	119.292	55.996
4.5	1	0	3	5	117.707	6.81333	152.28	31.4933	4	129.317	112.275	37.9973
4.5	1	0	3	5	102.453	5.50667	105.747	25.6933	4	92.226	121.548	53.9961
4.5	1	0	3	5	51.0667	3.26667	68.8267	24.04	4	77.941	119.292	51.9963
4.5	1	0	3	5	57.9867	4.13333	104.88	41.1733	4	91.474	124.806	29.9979
4.5	1	0	3	5	52.8133	39.2133	23.6933	47.84	3	87.214	73.68	9.99928
4.5	1	0	3	5	65.4533	35.5733	17.4933	15.7867	2	100.246	86.712	9.99928
4.5	1	0	3	5	62.8667	40.1467	23	39.1467	3	96.486	95.985	11.9991
4.5	1	0	3	5	76.84	32.48	46.4533	17.6667	4	70.924	81.199	13.999
4.5	1	0	3	5	44.32	25.3467	21.4533	51.84	3	64.157	93.73	17.9987
4.5	1	0	3	5	94.1733	29.36	23.8667	55.8667	3	69.42	102.501	15.9989
4.5	1	0	3	5	65.1733	27.1467	36.4	68.8533	3	91.474	113.528	21.9984
4.5	1	0	3	5	57.3067	20.68	23.5467	49.0533	3	103.002	105.258	15.9989
4.5	1	0	3	5	128.947	19.6267	32.9733	80.8267	3	80.698	111.022	25.9981
4.5	1	0	3	5	57.88	39.2933	20.2	42.9867	3	81.951	97.99	5.99957
4.5	1	0	3	5	78.5867	42.4133	18.7067	35.28	3	80.698	82.703	9.99928
4.5	1	0	3	5	154.227	30.5733	27.0267	29.3733	3	83.204	87.214	19.9986
4.5	1	0	3	5	58.4533	8.72	49.2667	124.413	1	75.184	93.228	13.999
4.5	1	0	3	5	69.7333	8.85333	82.88	102.413	1	87.965	81.7	7.99943
4.5	1	0	3	5	64.52	11.5067	39.1867	127.693	1	81.199	111.774	11.9991
4.5	1	0	3	5	104.213	11.5333	35.6267	110.373	1	79.194	99.744	21.9984
4.5	1	0	11	3	25.16	2.2	103.24	29.5733	4	66.761	66.011	23.6695
4.5	1	0	11	3	15.72	2.33333	117.667	47.4933	4	52.508	53.759	23.6695
4.5	1	0	11	3	18.52	5.12	134.88	56	4	38.506	59.76	27.6145
4.5	1	0	11	3	23.2533	4.14667	131.093	59.48	4	32.005	78.513	33.5318
4.5	1	0	11	3	19.0133	2.08	101.72	37.8	4	75.262	84.514	27.6145
4.5	1	0	11	3	13.0133	3.52	102.373	39.5733	4	52.258	87.764	27.6145
4.5	1	0	11	3	27.7867	4.09333	145.573	32.6933	4	68.511	97.766	35.5043
4.5	1	0	11	3	33.52	6.78667	148.04	37.7733	4	89.514	69.761	31.5594
4.5	1	0	11	3	31.96	6.02667	139.787	48.48	4	77.512	50.508	25.642
4.5	1	0	11	3	16.1333	3.38667	122.573	71.16	4	63.26	38.756	27.6145
4.5	1	0	11	3	23.1733	2.29333	128.093	43.72	4	52.008	31.255	39.4492
4.5	1	0	11	3	36.9867	3.33333	206.547	112.493	4	69.761	22.504	39.4492
4.5	1	0	11	3	26.9867	3.69333	184.387	33.2667	4	33.255	42.757	41.4217
4.5	1	0	11	3	24.8533	6.8	186.253	33.76	4	25.004	63.26	43.3942
4.5	1	0	11	3	31.2533	4.8	172.72	30.52	4	46.007	104.767	47.3391
4.5	1	0	11	3	41.4133	5.45333	209.813	96.8267	4	66.511	110.518	49.3115
4.5	1	0	11	3	37.9733	9.78667	173.32	173.947	1	90.014	99.016	45.3666
4.5	1	0	11	3	38.5467	6.48	186.36	111.253	4	100.766	92.265	59.1738
4.5	1	0	11	3	43.6667	9.33333	113.08	74.8933	4	100.266	82.513	43.3942
4.5	1	0	11	3	26.04	3.56	173.987	60.4667	4	30.005	89.264	43.3942
4.5	1	0	11	3	23.9733	11.4133	133.947	44.4	4	34.005	100.516	57.2014
4.5	1	0	11	3	34.0533	5.56	189.293	72.5067	4	24.504	89.514	67.0637
4.5	1	0	11	3	31.0133	7.38667	228.613	59.3867	4	20.253	77.512	55.2289
4.5	1	0	11	3	13.88	4.82667	136.133	39.5467	4	19.003	70.011	67.0637
4.5	1	0	11	3	25.0267	10.1867	220.76	83.6267	4	21.253	52.508	53.2565
4.5	1	0	11	3	19.16	4.73333	141.373	79.1067	4	23.504	42.007	61.1463
4.5	1	0	11	3	24.2133	5.70667	232.813	107.173	4	31.255	34.005	51.284
4.5	1	0	11	3	22.5067	3.17333	159.867	60.9867	4	40.757	28.755	69.0362
4.5	1	0	11	3	19.6667	2.65333	92.6667	24.84	4	35.256	37.756	76.926
4.5	1	0	11	3	35.7467	4.30667	218.053	78.28	4	54.009	18.753	61.1463
4.5	1	0	11	3	17.4667	2.89333	95.8933	43.6667	4	54.759	25.504	72.9811
4.5	1	0	11	3	31.9733	2.29333	98.7067	35.6267	4	67.261	23.004	71.0086
4.5	1	0	11	3	41.7733	4.52	139.333	32.9067	4	84.514	21.003	59.1738
4.5	1	0	11	3	45.1067	19.32	145.613	220.88	3	79.013	37.006	29.5869
4.5	1	0	11	3	54.4267	40.3067	134.373	76.6267	4	91.515	42.257	29.5869
4.5	1	0	11	3	43.48	6.89333	178.507	102.093	4	100.516	62.76	35.5043
4.5	1	0	11	3	36.48	11.0267	143.32	91.8533	4	108.267	65.761	41.4217
4.5	1	0	11	3	60.5467	28.9333	212.72	124.867	4	103.017	43.257	39.4492
4.5	1	0	11	3	51.36	11.0533	247	87.7467	4	103.267	35.506	49.3115
4.5	1	0	11	3	33.64	7.86667	234.573	121.76	4	110.018	48.258	53.2565
4.5	1	0	11	3	37.28	4.22667	217.64	57.8933	4	80.513	109.518	63.1188
4.5	1	0	11	3	18.6667	3	133.133	39.2533	4	67.261	105.767	76.926
4.5	1	0	11	3	13.3333	16.3733	93.3067	34.3333	4	55.259	97.516	84.8159
4.5	1	0	11	3	16.5733	1.4	71.1733	34.0133	4	75.262	95.265	88.7608
4.5	1	0	11	3	14.4533	10.84	61.7867	36	4	68.761	79.513	90.7332
4.5	1	0	11	3	19.7467	5.96	61.16	28.2933	4	51.258	72.012	94.6782
4.5	1	0	11	3	32.6667	7.96	113.133	34.8533	4	36.006	85.264	86.7883
4.5	1	0	11	3	19.08	13.5867	111.667	15.48	4	38.756	94.765	78.8985
4.5	1	0	11	3	14.28	0.653333	23.5867	13.8	4	75.012	57.009	94.6782
4.5	1	0	11	3	21.7067	1.81333	100.68	27.4133	4	30.505	65.761	84.8159
4.5	1	0	11	3	15.5867	1.46667	51.0267	8.93333	4	42.757	49.758	90.7332
4.5	1	0	11	3	18.0133	0.8	63.64	17.9467	4	58.759	44.507	90.7332
4.5	1	0	11	3	12.8267	2.22667	37.3467	22.3733	4	74.512	35.256	82.8434
4.5	1	0	11	3	57.7867	4.70667	165.56	27.3067	4	47.758	107.267	72.9811
4.5	1	0	11	3	73.9067	5.4	105.28	61.3733	4	107.017	71.762	57.2014
4.5	1	0	11	3	40.2133	6.74667	126.56	73.7333	4	110.268	58.509	57.2014
4.5	1	0	11	3	43.48	5.96	132.64	48.7733	4	92.015	26.504	63.1188
4.5	1	0	11	3	32.8267	121.24	32.2267	157.107	3	77.262	26.504	39.4492
4.5	1	0	11	3	83.1333	116.613	47.2533	191.133	3	82.513	37.256	43.3942
4.5	1	0	11	3	36.36	81.68	36.32	182.027	3	87.764	53.759	31.5594
4.5	1	0	11	3	44.72	62.08	22.9867	39.8933	3	102.016	56.759	43.3942
4.5	1	0	11	3	46.16	59.32	14.4267	16.92	2	95.015	32.255	53.2565
4.5	1	0	11	3	36.0933	4.94667	43.6933	206.8	1	73.012	40.507	33.5318
4.5	1	0	11	3	19.88	19.5867	43.2933	237.653	3	83.263	27.504	39.4492
4.5	1	0	11	3	42.4267	42.0533	33.76	176.12	3	97.516	55.509	39.4492
4.5	1	0	11	3	22.5867	4.22667	19.8933	100.4	1	98.516	73.512	39.4492
4.5	1	0	11	3	36.28	12.0533	21.7067	99.56	1	83.263	60.01	35.5043
4.5	1	0	11	4	28.7867	2.09333	100.453	72.2667	4	61.26	53.509	21.6971
4.5	1	0	11	4	28.7067	2.32	79.1067	42.0267	4	71.261	69.261	21.6971
4.5	1	0	11	4	41.1067	7.89333	84.24	58.9467	4	56.009	70.011	21.6971
4.5	1	0	11	4	37.8933	3.44	68.08	12.6	4	53.509	83.263	27.6145
4.5	1	0	11	4	38.44	9.34667	78.92	40.7333	4	66.011	87.764	25.642
4.5	1	0	11	4	28.28	2.37333	61.88	41.92	4	78.513	82.763	23.6695
4.5	1	0	11	4	52.3867	4.53333	77.12	25.64	4	39.256	60.51	35.5043
4.5	1	0	11	4	31.32	17.1467	115.04	36.96	4	39.006	75.012	31.5594
4.5	1	0	11	4	45.3333	2.74667	118.08	64.68	4	89.514	68.011	29.5869
4.5	1	0	11	4	46.48	6.42667	107.36	42.96	4	96.766	75.012	33.5318
4.5	1	0	11	4	45.1067	2.14667	101.44	46.2267	4	92.015	55.009	31.5594
4.5	1	0	11	4	46.8533	2.44	118.347	47.5733	4	85.764	40.507	31.5594
4.5	1	0	11	4	49.4667	4.53333	119.44	67.64	4	70.011	31.505	27.6145
4.5	1	0	11	4	50.48	2.96	146.907	107.627	4	53.259	34.506	29.5869
4.5	1	0	11	4	67.0133	6.58667	154.893	56.8267	4	55.009	22.254	43.3942
4.5	1	0	11	4	42.6533	11.0533	129.72	65.44	4	44.507	25.004	51.284
4.5	1	0	11	4	50.72	10.1067	131.6	89.52	4	36.756	38.256	55.2289
4.5	1	0	11	4	46.9467	17.8133	129.813	71.1467	4	34.756	49.508	37.4768
4.5	1	0	11	4	77.3867	17.2267	121.507	35.9333	4	26.254	64.01	49.3115
4.5	1	0	11	4	44.44	18.9467	70.6533	21.7067	4	26.504	54.759	51.284
4.5	1	0	11	4	28.48	9.14667	94.4133	45.8533	4	25.254	72.262	55.2289
4.5	1	0	11	4	39.8	17.8667	155.773	38.0667	4	33.005	81.763	41.4217
4.5	1	0	11	4	48.48	7.65333	87.6133	40.6933	4	25.504	85.514	59.1738
4.5	1	0	11	4	44.36	13.68	127.893	70.3333	4	29.505	90.265	49.3115
4.5	1	0	11	4	56.7333	6.06667	64.32	12.52	4	32.005	97.766	57.2014
4.5	1	0	11	4	46.9733	3.54667	72.48	14.5733	4	40.507	97.266	43.3942
4.5	1	0	11	4	49.1733	2.84	99.6133	43.7733	4	47.758	96.265	33.5318
4.5	1	0	11	4	36.1867	3.10667	107.6	55.72	4	68.761	98.016	31.5594
4.5	1	0	11	4	66.92	17.8	130.12	55.28	4	59.009	106.267	41.4217
4.5	1	0	11	4	45.0267	4.61333	126.867	41.2533	4	104.767	70.011	41.4217
4.5	1	0	11	4	49.92	5.37333	142.853	56.28	4	104.767	47.508	45.3666
4.5	1	0	11	4	45.5333	19.9067	138.693	75.2267	4	111.518	58.259	55.2289
4.5	1	0	11	4	44.3067	8.50667	103.787	39.0133	4	110.268	71.762	57.2014
4.5	1	0	11	4	60.4133	12.7067	153.387	49.32	4	104.267	85.014	49.3115
4.5	1	0	11	4	46.48	7.85333	91.8133	28.6933	4	94.515	90.265	43.3942
4.5	1	0	11	4	52.4667	45.0133	157.627	70.5867	4	93.515	100.766	49.3115
4.5	1	0	11	4	61.56	9.45333	118.893	44.56	4	98.766	98.266	61.1463
4.5	1	0	11	4	72.9867	10.32	97.68	24.32	4	80.263	101.766	39.4492
4.5	1	0	11	4	85.68	24.7867	162.92	85.8933	4	87.514	108.768	61.1463
4.5	1	0	11	4	44.8267	26.9467	103.893	79.76	4	70.761	108.517	49.3115
4.5	1	0	11	4	26.04	2.58667	39.9733	6.46667	4	66.511	107.267	76.926
4.5	1	0	11	4	86.2	6.78667	135.307	22.1867	4	68.761	114.518	63.1188
4.5	1	0	11	4	24.24	0.906667	43.96	8.72	4	57.009	101.266	80.8709
4.5	1	0	11	4	61.4667	12.7067	111.933	16.8933	4	53.759	116.769	67.0637
4.5	1	0	11	4	38.6533	29.96	81.44	35.9867	4	52.008	113.018	53.2565
4.5	1	0	11	4	53.5333	10.6133	113.813	41.5333	4	46.007	107.267	49.3115
4.5	1	0	11	4	53.3067	7.16	108.773	23.08	4	37.756	105.767	63.1188
4.5	1	0	11	4	44.1067	7.8	79.4	64.48	4	42.757	42.757	71.0086
4.5	1	0	11	4	40.2533	2.38667	65.3333	63.9467	4	47.758	31.005	67.0637
4.5	1	0	11	4	57.68	8.37333	220.413	55.9333	4	69.761	10.002	49.3115
4.5	1	0	11	4	48.24	4.48	166.173	46.9867	4	91.015	17.503	47.3391
4.5	1	0	11	4	46.0267	7.85333	157.213	41.48	4	80.013	20.753	35.5043
4.5	1	0	11	4	48.76	3.42667	124.133	39.4933	4	96.265	39.256	39.4492
4.5	1	0	11	4	44.5467	7.05333	157.987	84.72	4	103.767	35.756	51.284
4.5	1	0	11	4	101.467	4.61333	124.387	43.1333	4	100.516	31.505	63.1188
4.5	1	0	11	4	36.88	3.17333	84.12	45.7733	4	102.767	39.256	67.0637
4.5	1	0	11	4	50.3333	3.01333	79.6133	55.72	4	103.517	50.758	72.9811
4.5	1	0	11	4	44.72	5.73333	65.6133	37.32	4	101.516	63.26	76.926
4.5	1	0	11	4	23.64	2.73333	76.9733	35.0133	4	97.766	76.512	78.8985
4.5	1	0	11	4	61.8	6.08	100.467	30.32	4	107.517	84.514	65.0912
4.5	1	0	11	4	39.4667	1.70667	38.64	23.4133	4	95.765	92.015	74.9535
4.5	1	0	11	4	34.56	1.01333	26.9467	7.34667	4	38.506	96.015	72.9811
4.5	1	0	11	4	20.7867	2.46667	40.8	14.9067	4	47.508	90.265	86.7883
4.5	1	0	11	4	20.4667	3.44	55.2267	20.04	4	54.509	79.013	94.6782
4.5	1	0	11	4	24.3067	1.06667	63.24	40.8667	4	64.51	76.262	94.6782
4.5	1	0	11	4	33.9733	1.58667	57.5333	7.68	4	55.009	62.26	94.6782
4.5	1	0	11	4	44.68	0.733333	59.3733	23.1467	4	66.511	57.509	94.6782
4.5	1	0	11	4	34.0267	2.37333	55.3333	27.4133	4	77.512	71.762	94.6782
4.5	1	0	11	4	27.3733	4.92	49.76	28.4933	4	82.513	65.01	94.6782
4.5	1	0	11	4	45.6133	3.48	45.3067	22.6133	4	61.76	44.007	94.6782
4.5	1	0	11	4	26.3333	1.25333	33.8933	9.6	4	83.013	50.258	94.6782
4.5	1	0	11	4	35.7067	9.89333	51.7333	15.6533	4	84.264	83.763	88.7608
4.5	1	0	11	4	29.8933	1.54667	61.96	19.3867	4	40.507	52.508	80.8709
4.5	1	0	11	4	36.6133	1.88	51.8	35.9467	4	68.261	96.766	86.7883
4.5	1	0	11	4	32.5867	11.1067	47.24	28.5067	4	80.763	96.516	84.8159
4.5	1	0	11	4	28.0267	1.37333	27.24	21.4	4	92.015	35.756	76.926
4.5	1	0	11	4	53.9067	1.72	19.8133	26.9333	1	76.012	29.505	76.926
4.5	1	0	11	4	52.0267	5.14667	30.08	38.6933	1	60.01	32.005	76.926
4.5	1	0	11	4	28.4133	2.68	57.9467	21.5867	4	42.757	65.01	27.6145
4.5	1	0	11	4	22.1067	1.30667	33.9067	7.24	4	39.506	72.512	82.8434
4.5	1	0	11	4	95.2667	6.76	44.36	16.4667	4	70.011	20.003	67.0637
4.5	1	0	11	4	75.04	10.6267	73.4933	25.4667	4	28.505	63.01	78.8985
4.5	1	0	11	4	49.6267	4.92	42.8533	17.9467	4	50.508	110.768	72.9811
4.5	1	0	11	4	135.987	31.9867	14.6133	13	2	78.513	16.503	53.2565
4.5	1	0	11	4	69.8267	32.7467	36.4667	17.8267	4	87.514	21.754	51.284
4.5	1	0	11	4	72.2533	2.86667	24.64	110.52	1	63.26	29.755	49.3115
4.5	1	0	11	4	146.48	3.30667	26.6267	112.973	1	72.012	29.755	55.2289
4.5	1	24	3	1	117.56	10.2933	120.707	56.3067	4	103.134	115.138	41.997
4.5	1	24	3	1	74.28	10.0933	95.88	38.32	4	92.11	100.929	39.9971
4.5	1	24	3	1	70.2133	2.64	108.76	57	4	95.295	83.781	39.9971
4.5	1	24	3	1	67.9733	7.26667	125.733	46.36	4	104.849	73.492	41.997
4.5	1	24	3	1	58.6933	2.73333	108.96	52.32	4	110.973	103.379	41.997
4.5	1	24	3	1	56.8667	5.34667	100.613	40.8267	4	128.122	114.648	45.9967
4.5	1	24	3	1	135.907	17.7467	116.613	120.307	3	110.238	133.511	47.9966
4.5	1	24	3	1	98.64	9.06667	120.133	86.8667	4	96.765	139.145	49.9964
4.5	1	24	3	1	75.6933	7.90667	124.48	67.88	4	92.845	142.085	61.9956
4.5	1	24	3	1	203.293	10.5867	86.9733	106.36	1	84.516	126.162	59.9957
4.5	1	24	3	1	119.733	8.04	133.907	123.613	4	85.496	124.447	41.997
4.5	1	24	3	1	54.0667	6.24	108.627	56.2533	4	71.288	113.423	43.9969
4.5	1	24	3	1	53.36	3	125.533	34.5333	4	71.043	125.182	59.9957
4.5	1	24	3	1	40.9867	4.4	109.28	52.3733	4	73.982	91.865	39.9971
4.5	1	24	3	1	51.5067	6.2	111.613	45.4	4	78.637	70.063	43.9969
4.5	1	24	3	1	169.213	4.72	153	17.36	4	73.982	64.918	69.995
4.5	1	24	3	1	54.72	6.66667	117.333	32.0667	4	59.774	82.801	49.9964
4.5	1	24	3	1	44.9867	5.82667	101.027	36.4933	4	52.669	81.086	57.9959
4.5	1	24	3	1	74.5733	5.89333	102.907	22.7333	4	55.609	74.717	67.9951
4.5	1	24	3	1	45.3867	7.65333	105.12	35.0933	4	52.424	99.705	63.9954
4.5	1	24	3	1	46.8667	4.32	81.2533	29.8267	4	59.774	113.178	73.9947
4.5	1	24	3	1	26.0267	8.89333	57.1067	29.6533	4	69.083	105.094	91.9934
4.5	1	24	3	1	32.1467	1.12	52.3333	22.52	4	85.006	93.335	91.9934
4.5	1	24	3	1	55.0667	6.78667	74.6133	70.8267	4	124.202	107.299	89.9936
4.5	1	24	3	1	58.2533	3.38667	124.053	71.16	4	130.571	95.54	79.9943
4.5	1	24	3	1	65.2667	8.62667	163.973	75.3867	4	124.692	87.456	57.9959
4.5	1	24	3	1	106.107	10.4667	159.12	57.52	4	119.302	77.657	57.9959
4.5	1	24	3	1	82.84	6.08	125.667	50.12	4	95.54	62.468	55.996
4.5	1	24	3	1	153.573	6.08	143.267	21.8533	4	97.745	58.304	71.9949
4.5	1	24	3	1	71.8267	5.85333	95.7733	14.64	4	83.781	58.549	67.9951
4.5	1	24	3	1	160.893	7.52	191.667	98.3333	4	133.266	121.507	65.9953
4.5	1	24	3	1	69.9467	3.05333	155.12	57.7333	4	118.078	140.125	63.9954
4.5	1	24	3	1	144.133	17.3867	72.6667	60.8933	4	99.705	134.491	73.9947
4.5	1	24	3	1	54.1333	13.5867	83.92	36.28	4	56.834	90.885	77.9944
4.5	1	24	3	1	40.08	5.18667	73.6533	26.9067	4	63.693	74.962	77.9944
4.5	1	24	3	1	36.36	5.77333	63.5467	34.3467	4	80.107	80.597	87.9937
4.5	1	24	3	1	45.72	5.52	72.8267	61.3867	4	107.544	85.986	91.9934
4.5	1	24	3	1	35.4667	4.70667	63.04	31.8933	4	121.017	82.311	87.9937
4.5	1	24	3	1	43.2267	1.8	7.92	11.3733	1	100.194	120.527	93.9933
4.5	1	24	3	1	37.28	2.61333	39.4667	9.44	4	77.902	120.037	83.994
4.5	1	24	3	1	65.3067	3.54667	78.7867	19.7467	4	78.147	68.593	81.9942
4.5	1	24	3	1	57.3467	6.85333	82.7067	33.88	4	68.348	67.613	51.9963
4.5	1	24	3	1	41.52	10.16	78.92	37.6	4	112.933	70.308	73.9947
4.5	1	24	3	1	29.08	0.76	55.2267	19.76	4	85.251	95.05	93.9933
4.5	1	24	3	1	12.76	1.84	30.2133	14.44	4	103.134	104.114	93.9933
4.5	1	24	3	1	160.24	6.13333	34.24	42.3733	1	121.262	128.856	85.9939
4.5	1	24	3	1	65.36	38.2	13.28	59.4	3	90.885	118.568	43.9969
4.5	1	24	3	1	135.507	45.5467	15.2267	71.9867	3	121.262	130.571	57.9959
4.5	1	24	3	1	111.373	37.28	24.0667	92.68	3	101.909	140.37	57.9959
4.5	1	24	3	1	152.92	45.32	9.94667	31.1467	3	94.07	126.162	59.9957
4.5	1	24	3	1	115.147	32.4133	21.76	85.2267	3	103.869	132.531	53.9961
4.5	1	24	3	1	95.4933	24.2533	26.8667	143.467	3	97.99	124.202	43.9969
4.5	1	24	3	1	94.0133	6.96	17.56	111.573	1	115.138	118.078	47.9966
4.5	1	24	3	2	61.52	8.62667	92.2	61.7733	4	89.171	101.419	27.998
4.5	1	24	3	2	58.4667	10	101.627	75.6133	4	97.255	70.308	27.998
4.5	1	24	3	2	102.387	10.7067	115.667	82.4	4	115.873	83.536	27.998
4.5	1	24	3	2	64.5067	3.77333	124.133	66.6667	4	109.503	114.158	31.9977
4.5	1	24	3	2	55.76	3.26667	111.533	77.6133	4	78.147	79.127	31.9977
4.5	1	24	3	2	78	2.09333	117.867	43.1467	4	68.838	105.829	41.997
4.5	1	24	3	2	94.88	3.66667	137.427	79.4133	4	66.388	76.432	45.9967
4.5	1	24	3	2	122.36	8.28	157.147	15.1733	4	58.304	89.171	53.9962
4.5	1	24	3	2	74.9467	9.58667	166.453	63.8133	4	80.352	61.734	49.9964
4.5	1	24	3	2	54.3867	9.84	117.4	51.68	4	100.194	56.589	53.9962
4.5	1	24	3	2	63.1467	4.34667	132.027	92	4	117.588	67.123	39.9972
4.5	1	24	3	2	82.3467	10.2933	141.467	63.2133	4	127.632	75.697	53.9962
4.5	1	24	3	2	80.0533	3.08	165.067	82.24	4	125.672	95.05	41.997
4.5	1	24	3	2	64.0133	4.88	98.6667	100.653	1	129.591	98.48	55.996
4.5	1	24	3	2	69.9467	13.16	106.16	34.6133	4	109.259	123.467	53.9962
4.5	1	24	3	2	45.3333	7.74667	88.96	47.68	4	85.496	121.017	43.9969
4.5	1	24	3	2	89.72	1.84	83.4667	14.8533	4	72.512	119.302	63.9955
4.5	1	24	3	2	103.613	8.46667	64.7733	21.76	4	63.938	104.604	65.9953
4.5	1	24	3	2	101.173	3.93333	112.267	40.28	4	62.223	79.862	65.9953
4.5	1	24	3	2	34.08	7.34667	40.04	22.5333	4	80.597	101.419	83.994
4.5	1	24	3	2	28.9733	1.37333	33.4133	18.0933	4	88.191	92.355	85.9939
4.5	1	24	3	2	30.2667	3.46667	35.64	19.5867	4	94.315	73.492	87.9937
4.5	1	24	3	2	41.6267	4.93333	52.4933	21.04	4	117.098	73.247	81.9942
4.5	1	24	3	2	121.667	8.52	113.12	47.8533	4	128.366	75.452	63.9955
4.5	1	24	3	2	46.88	4.38667	96.96	19.48	4	110.728	58.304	65.9953
4.5	1	24	3	2	25.6667	1.53333	17.3867	14.48	4	109.014	95.785	87.9937
4.5	1	24	3	2	45.72	2.70667	39.9067	13.2133	4	69.573	84.761	79.9943
4.5	1	24	3	2	27.04	4.54667	43.2933	23.12	4	96.52	74.472	89.9936
4.5	1	24	3	2	41.7467	8.82667	35.5733	15.7733	4	85.741	118.568	73.9947
4.5	1	24	3	2	59.8133	27.9333	39.7067	122.413	3	116.853	99.949	37.9973
4.5	1	24	3	2	66.2	26.1867	15.2133	46.1733	3	108.769	100.439	33.9976
4.5	1	24	3	2	71.2533	32.1067	16.4	94.3733	3	103.869	83.781	33.9976
4.5	1	24	3	2	72.2133	44.4133	19.08	65.2267	3	90.64	74.717	33.9976
4.5	1	24	3	2	99.3733	58.2133	20.2933	109.827	3	104.849	73.492	37.9973
4.5	1	24	3	2	182.533	56.44	39.72	119.92	3	116.118	78.392	41.997
4.5	1	24	3	2	67.24	7.72	20.6533	108.773	1	109.259	93.335	35.9974
4.5	1	24	3	2	42.7067	16.1333	21.3333	88.6933	3	100.684	112.933	31.9977
4.5	1	24	3	2	216.853	7.14667	23.04	98.6267	1	98.725	93.58	39.9972
4.5	1	24	3	3	49.2133	2.45333	62.44	36.0933	4	99.215	103.134	95.9932
4.5	1	24	3	3	38.5867	13.64	55.3467	26.3067	4	99.46	87.946	91.9934
4.5	1	24	3	3	48.8133	2.89333	62.04	18.0667	4	88.191	83.046	91.9934
4.5	1	24	3	3	41.6933	5.90667	70.7467	28.0267	4	83.536	76.922	83.994
4.5	1	24	3	3	66.12	5.52	47.3733	15.56	4	94.805	111.953	89.9936
4.5	1	24	3	3	49.84	2.09333	45.8133	26.1733	4	110.973	110.483	89.9936
4.5	1	24	3	3	58.1067	6.24	57.84	39.9067	4	111.463	94.315	89.9936
4.5	1	24	3	3	68.2133	1.52	56.8533	31.5333	4	112.443	82.311	85.9939
4.5	1	24	3	3	53.88	1.64	108.667	59.36	4	103.869	102.154	37.9973
4.5	1	24	3	3	51.48	2.86667	102.573	41.6133	4	89.906	103.134	37.9973
4.5	1	24	3	3	74.48	2.85333	104.16	83.88	4	91.865	114.648	39.9971
4.5	1	24	3	3	61.04	11.0533	119.4	95.0267	4	76.922	112.933	45.9967
4.5	1	24	3	3	95.92	4	123.68	69.72	4	106.319	124.447	45.9967
4.5	1	24	3	3	47.36	15.76	97.6933	63.4267	4	87.456	87.211	37.9973
4.5	1	24	3	3	54.64	6.44	108.787	53.2533	4	78.637	96.03	41.997
4.5	1	24	3	3	61	2.25333	83.0267	47.28	4	101.174	85.986	37.9973
4.5	1	24	3	3	110.107	3.21333	112.36	64.4133	4	111.463	87.456	39.9971
4.5	1	24	3	3	73.4933	3.10667	113.707	76.9333	4	120.037	96.03	43.9969
4.5	1	24	3	3	90.96	2.09333	137.227	45.3867	4	91.865	134.736	57.9959
4.5	1	24	3	3	112.76	4.44	139.027	42.3467	4	85.251	131.551	61.9956
4.5	1	24	3	3	50.0667	1.28	81.9733	28.5333	4	78.392	130.816	69.995
4.5	1	24	3	3	57.2533	2.08	116.693	44.7467	4	115.383	133.021	57.9959
4.5	1	24	3	3	71.4133	2.68	81.36	19.4133	4	123.222	130.816	69.995
4.5	1	24	3	3	79.0267	3.18667	46.3333	24.76	4	113.668	123.467	83.994
4.5	1	24	3	3	91.64	4.69333	132.707	59.5467	4	134.491	117.588	57.9959
4.5	1	24	3	3	114.173	3.41333	92.88	38.7733	4	134.001	113.913	75.9946
4.5	1	24	3	3	104.573	4.69333	130.8	48.6933	4	137.431	102.644	59.9957
4.5	1	24	3	3	232.227	4.50667	104.853	60.7733	4	126.162	83.046	55.996
4.5	1	24	3	3	76.84	5.68	84.28	50.0133	4	114.403	81.086	49.9964
4.5	1	24	3	3	44.6133	7.08	81.7867	19.4667	4	102.644	73.002	45.9967
4.5	1	24	3	3	80.9067	7.38667	119.08	53.0933	4	92.11	69.818	43.9969
4.5	1	24	3	3	83.7467	5.14667	124.333	25.8	4	86.231	64.183	57.9959
4.5	1	24	3	3	40.4267	9.28	86.6	28.4267	4	104.849	64.183	53.9962
4.5	1	24	3	3	53.9867	31.64	77.9067	28.5067	4	97.99	60.509	67.9952
4.5	1	24	3	3	50.7867	7.48	81.0933	45.7733	4	118.568	72.267	55.996
4.5	1	24	3	3	227.6	2.8	102.987	76.52	4	127.387	76.187	65.9953
4.5	1	24	3	3	136.6	20.2667	43.3733	79.64	3	123.467	114.403	47.9966
4.5	1	24	3	3	90.4667	13.04	122.053	78.1733	4	70.798	89.416	47.9966
4.5	1	24	3	3	97.3067	21.28	141.68	56.2667	4	63.203	89.171	59.9957
4.5	1	24	3	3	89.8133	19.4933	161.587	54.32	4	70.063	72.512	63.9954
4.5	1	24	3	3	78.32	10.9067	93.6133	44.3867	4	74.717	79.127	51.9963
4.5	1	24	3	3	46.9467	12.0267	48.0267	26.2267	4	99.949	74.962	87.9937
4.5	1	24	3	3	83.6	9.88	100.12	55.9333	4	68.103	99.949	53.9962
4.5	1	24	3	3	62.6667	14.9733	91.9733	29.4667	4	63.448	104.849	63.9954
4.5	1	24	3	3	87.3333	27.4533	151.32	96.8533	4	68.348	109.503	55.996
4.5	1	24	3	3	60.7733	3.05333	91.12	30.9467	4	72.267	121.997	59.9957
4.5	1	24	3	3	82.9467	4.70667	93.9067	40.2267	4	73.247	111.708	73.9947
4.5	1	24	3	3	23.7867	4.49333	26.2	4.94667	4	84.026	97.5	91.9934
4.5	1	24	3	3	95.9733	26.0667	23.4133	81.36	3	122.732	104.849	51.9963
4.5	1	24	3	3	82.4	46	17.5333	26.4	3	116.363	120.037	53.9962
4.5	1	24	3	3	80.1067	33.8933	31.6933	33.3333	3	121.262	124.692	65.9953
4.5	1	24	3	3	237.04	44.2933	28.3467	124.347	3	121.507	114.648	61.9956
4.5	1	24	3	3	52.8667	5.34667	35.3467	137.64	1	114.893	107.544	49.9964
4.5	1	24	3	3	69.2533	3.64	19.28	134.04	1	109.993	115.873	53.9962
4.5	1	24	3	4	79.7733	4.90667	200.267	49.0133	4	113.16	90.928	31.9977
4.5	1	24	3	4	143.92	8.36	160.613	83.3067	4	117.407	107.664	33.9976
4.5	1	24	3	4	126.64	5.29333	206.067	117.04	4	97.423	120.155	33.9976
4.5	1	24	3	4	106.72	5.01333	183.787	60.8133	4	79.437	119.155	37.9973
4.5	1	24	3	4	75.2267	3.46667	157.213	48.7867	4	81.435	97.922	33.9976
4.5	1	24	3	4	66.8533	4.46667	181.547	69.1067	4	90.928	81.435	39.9971
4.5	1	24	3	4	65.7333	1.52	130.533	36.56	4	109.913	79.936	41.997
4.5	1	24	3	4	65.32	7.13333	150.747	70.0133	4	102.668	70.694	45.9967
4.5	1	24	3	4	51.5867	4.66667	121	44.3333	4	91.178	69.695	47.9966
4.5	1	24	3	4	63.1333	1.81333	140.987	43.8133	4	74.94	71.943	49.9964
4.5	1	24	3	4	95.2267	4.50667	151.92	66.7867	4	71.193	83.933	47.9966
4.5	1	24	3	4	108.373	3.88	173.867	72.4267	4	98.672	137.641	51.9963
4.5	1	24	3	4	128.373	3.93333	122.52	21.7867	4	110.412	136.142	49.9964
4.5	1	24	3	4	132.453	2.98667	179.44	32.2133	4	122.153	127.149	39.9971
4.5	1	24	3	4	99.8267	5.69333	179.2	65.7467	4	130.147	102.419	49.9964
4.5	1	24	3	4	79.28	1.44	92.7333	27.5467	4	134.143	114.659	65.9953
4.5	1	24	3	4	79.88	2.21333	155.667	49.96	4	133.144	91.178	69.995
4.5	1	24	3	4	103.107	5.30667	149.387	60.7067	4	122.403	77.938	53.9961
4.5	1	24	3	4	141.413	8.16	142.12	50.08	4	124.651	77.688	77.9944
4.5	1	24	3	4	174.973	5.62667	197.907	58.1067	4	113.66	66.697	71.9948
4.5	1	24	3	4	85.76	4.09333	154.733	53.3333	4	94.925	60.202	61.9956
4.5	1	24	3	4	79.2267	5.53333	148	43.2533	4	83.933	61.951	59.9957
4.5	1	24	3	4	80.1333	2.74667	183.893	34.44	4	74.94	70.944	53.9961
4.5	1	24	3	4	68.4	3.68	177.947	45.1467	4	72.193	62.95	67.9951
4.5	1	24	3	4	83.6667	3.92	167.44	47.7333	4	60.202	86.182	65.9953
4.5	1	24	3	4	95.9067	3.76	175.173	54.8	4	58.953	106.915	65.9953
4.5	1	24	3	4	122.373	4.58667	126.387	37.5467	4	61.451	101.669	75.9946
4.5	1	24	3	4	86.76	6.68	164.693	77.4933	4	66.447	120.404	61.9956
4.5	1	24	3	4	84.96	7.36	157.333	71.6667	4	83.184	135.892	61.9956
4.5	1	24	3	4	107.08	3.54667	81.72	29.5067	4	84.683	131.396	77.9944
4.5	1	24	3	4	69.1467	2.13333	57.5467	13.6533	4	108.913	115.908	93.9933
4.5	1	24	3	4	44.4	1.12	40.6533	9.24	4	101.419	106.166	97.993
4.5	1	24	3	4	37.9733	2.37333	35.4133	19.8933	4	87.93	123.152	89.9936
4.5	1	24	3	4	59.12	1.6	55.7867	17.1467	4	70.944	112.161	87.9937
4.5	1	24	3	4	127.213	3.86667	68.3067	28	4	70.194	119.155	81.9941
4.5	1	24	3	4	80.6133	1.88	63.72	22.4667	4	67.446	99.421	85.9938
4.5	1	24	3	4	36.9733	1.44	44.64	12.3867	4	81.435	96.423	93.9933
4.5	1	24	3	4	12.8267	1	38.92	18.0133	4	102.918	88.929	97.993
4.5	1	24	3	4	32.56	2.48	57.8533	9.84	4	111.911	83.933	93.9933
4.5	1	24	3	4	51.4933	1.48	73.52	13.3867	4	116.907	94.925	89.9936
4.5	1	24	3	4	69.7467	1.84	77.0267	15.96	4	126.15	103.917	85.9938
4.5	1	24	3	4	16.2533	1.96	49.8933	24.8533	4	83.933	82.185	95.9931
4.5	1	24	3	4	54.0667	2.69333	69.7733	22.8667	4	75.44	74.94	95.9931
4.5	1	24	3	4	67.3333	1.85333	83.6667	18.0667	4	95.924	71.943	95.9931
4.5	1	24	3	4	113.16	3.22667	126.933	36.04	4	85.182	61.701	83.994
4.5	1	24	3	4	61.9733	3.50667	106.907	22.72	4	67.696	73.941	79.9943
4.5	1	24	3	4	45.9867	2.56	108.267	19.9867	4	66.197	87.93	85.9938
4.5	1	24	3	4	123.187	6.01333	81.52	26.2	4	75.69	125.9	69.995
4.5	1	24	3	4	108.027	1.8	49.4933	18.7467	4	114.409	122.153	85.9938
4.5	1	24	3	4	60.32	5.24	73.2933	21.3067	4	101.669	63.45	85.9938
4.5	1	24	3	4	79.6933	1.56	41.5867	14.4133	4	110.662	129.647	77.9944
4.5	1	24	3	4	66.9067	2.61333	36.52	16.7467	4	96.423	131.895	81.9941
4.5	1	24	3	4	80.72	1.52	34.68	15.48	4	122.153	122.653	77.9944
4.5	1	24	3	4	197.88	5.97333	37.6	16.5067	4	57.205	125.151	61.9956
4.5	1	24	3	4	78.6533	11.6667	17.8	133.573	1	93.426	101.669	33.9976
4.5	1	24	3	4	100.32	2.61333	58	6.42667	4	68.196	103.418	43.9969
4.5	1	24	3	4	83.7467	1.52	52.8933	10.36	4	77.688	129.147	45.9967
4.5	1	24	3	4	105	37.7333	9.25333	34.1067	3	104.167	98.422	31.9977
4.5	1	24	3	4	108.92	53.5067	7.98667	13.1733	2	108.913	114.409	37.9973
4.5	1	24	3	4	198.133	52.1867	16.52	22.24	2	101.419	126.899	45.9967
4.5	1	24	3	4	93.2667	61.9333	15.1333	8.24	2	86.431	119.905	45.9967
4.5	1	24	3	4	100.92	35.8267	8.53333	45.1867	3	88.43	111.411	41.997
4.5	1	24	3	4	122.813	31.6133	40.4667	77	3	97.173	115.408	37.9973
4.5	1	24	3	4	54.9733	35.7467	6.32	13.2933	2	100.17	105.916	41.997
4.5	1	24	3	4	113.84	3.30667	151.44	66.0533	4	95.924	139.639	65.9953
4.5	1	24	3	4	141.747	8.90667	22.2133	134.173	1	112.91	122.403	43.9969
4.5	1	24	3	4	87.2933	12.0933	16.6533	99.12	1	107.664	105.416	39.9971
4.5	1	24	3	4	81.68	7.94667	13.7333	73.1067	1	115.908	99.171	39.9971
4.5	1	24	3	4	41.1733	2.89333	15.9333	87.8933	1	96.923	91.677	37.9973
4.5	1	24	3	4	66.8533	6.44	15.0533	96.7333	1	102.918	114.159	43.9969
4.5	1	24	11	2	194.333	3.64	100.88	6.01333	4	101.226	86.702	15.7408
4.5	1	24	11	2	133.107	9.38667	80.8933	3.61333	4	110.165	100.333	17.7084
4.5	1	24	11	2	185.6	1.84	51.9333	3.30667	4	87.148	113.516	21.6436
4.5	1	24	11	2	145.8	7.52	95.9867	3.45333	4	80.668	97.428	23.6112
4.5	1	24	11	2	145.947	1.36	101.76	3.17333	4	111.952	115.304	33.4492
4.5	1	24	11	2	176.187	7.52	68.4933	3.76	4	74.858	91.618	29.514
4.5	1	24	11	2	129.36	2.64	103.813	5.42667	4	71.506	107.93	29.514
4.5	1	24	11	2	156.48	1.04	36.2933	2.01333	4	80.668	79.998	29.514
4.5	1	24	11	2	205.253	1.72	69.8	2.90667	4	95.193	75.976	29.514
4.5	1	24	11	2	181.347	1.4	93.5467	4.76	4	66.59	71.506	31.4816
4.5	1	24	11	2	155.107	1.4	54.3733	1.93333	4	62.121	84.02	33.4492
4.5	1	24	11	2	215.16	12.8267	87.0667	4.97333	4	46.926	77.316	45.2548
4.5	1	24	11	2	190.52	3.96	63.7333	3.64	4	47.82	95.64	53.1252
4.5	1	24	11	2	246.653	4.86667	90.0533	5.78667	4	44.245	103.014	45.2548
4.5	1	24	11	2	103.533	2.04	55.9067	1.93333	4	89.83	120.891	47.2224
4.5	1	24	11	2	133.52	1.25333	68.8533	2.86667	4	75.305	124.019	55.0928
4.5	1	24	11	2	109.8	3.74667	78.4933	5.2	4	61.898	117.092	59.028
4.5	1	24	11	2	89.5733	2.16	53.9067	2.08	4	108.6	115.751	59.028
4.5	1	24	11	2	99.48	5.42667	55.4	1.57333	4	95.416	111.952	64.9309
4.5	1	24	11	2	59.6533	1.29333	28.2667	1.28	4	86.702	108.824	72.8013
4.5	1	24	11	2	56.3733	1.2	33.8	1.28	4	96.757	98.545	78.7041
4.5	1	24	11	2	98.3733	2.42667	53.4267	1.4	4	111.058	95.193	72.8013
4.5	1	24	11	2	96.12	0.76	37.2267	1.12	4	112.623	77.093	72.8013
4.5	1	24	11	2	169.44	10.0267	96.1467	3.34667	4	110.612	79.998	41.3196
4.5	1	24	11	2	212.2	2.04	103.56	5.02667	4	77.54	59.887	41.3196
4.5	1	24	11	2	205.12	4.42667	110.493	8.76	4	92.511	50.278	53.1252
4.5	1	24	11	2	180.853	2.8	74.8133	4.32	4	112.623	67.261	49.19
4.5	1	24	11	2	89.9867	1.24	60.2667	1.92	4	128.488	92.735	59.028
4.5	1	24	11	2	137.413	14.1467	54.4133	3.84	4	114.857	88.936	35.4168
4.5	1	24	11	2	52.4667	0.64	21.5333	0.52	4	95.193	88.266	88.5421
4.5	1	24	11	2	61.1333	0.92	25.6133	1.44	4	83.797	100.332	88.5421
4.5	1	24	11	2	59.3333	1.24	28.44	1.85333	4	78.657	90.5	88.5421
4.5	1	24	11	2	92.72	1.44	53.6133	1.88	4	67.931	80.445	88.5421
4.5	1	24	11	2	66.36	0.84	38.0533	2.82667	4	78.21	70.389	88.5421
4.5	1	24	11	2	79.3733	0.88	54.28	3	4	84.69	71.953	88.5421
4.5	1	24	11	2	70.4533	1.77333	32.64	1.04	4	99.886	77.093	82.6393
4.5	1	24	11	2	87.84	2.25333	45.4933	3.56	4	101.226	59.44	74.7689
4.5	1	24	11	2	93.6	0.76	48.32	3.57333	4	63.015	72.177	80.6717
4.5	1	24	11	2	136.333	1.28	56.7733	3.30667	4	64.579	59.216	74.7689
4.5	1	24	11	2	113.067	0.76	39.48	2.6	4	51.619	69.495	64.9309
4.5	1	24	11	2	185.64	2.6	97.68	4.50667	4	108.824	76.199	29.514
4.5	1	24	11	2	83.4667	1.2	39.92	2.25333	4	69.719	107.93	78.7041
4.5	1	24	11	2	58.56	0.48	39.5467	2.98667	4	64.132	99.215	78.7041
4.5	1	24	11	2	65.3467	1.96	48.8933	2.44	4	47.596	82.456	68.8661
4.5	1	24	11	2	176.92	15.24	14.4133	2.24	2	94.076	89.16	29.514
4.5	1	24	11	2	196.347	18.7467	11.6133	1.88	2	103.908	85.137	29.514
4.5	1	24	11	2	159.147	23.28	11.84	1.64	2	114.634	96.981	45.2548
4.5	1	24	11	2	174.84	21.5867	6.88	1.84	2	90.5	98.768	31.4816
4.5	1	24	11	2	177.573	13.7067	8.86667	2.69333	2	99.886	100.332	31.4816
4.5	1	24	11	2	178.04	13.92	10.9467	2.4	2	93.182	111.729	31.4816
4.5	1	24	11	2	180.107	19.0533	9.61333	2.73333	2	105.695	105.695	35.4168
4.5	1	24	11	2	157.747	10.24	8.69333	2.16	2	96.31	109.941	43.2872
4.5	1	24	11	2	135.8	15.5733	9.97333	1.36	2	94.746	109.494	57.0604
4.5	1	24	11	2	108.92	13.8533	10.24	1.68	2	113.07	100.556	59.028
4.5	1	24	11	2	108.667	14.76	13.08	1.37333	2	116.645	89.83	53.1252
4.5	1	24	11	2	167.333	22.3733	9.36	1.4	2	102.344	88.489	41.3196
4.5	1	24	11	2	103.787	10.2533	2.98667	1.04	2	91.618	86.925	59.028
4.5	1	24	11	2	219.933	26.8133	15.7733	2.48	2	105.249	101.673	25.5788
4.5	1	24	12	1	126.013	14.0667	168.987	174.64	1	72.678	78.652	17.734
4.5	1	24	12	1	180.227	38.4533	182.293	148.347	4	62.125	75.864	19.7045
4.5	1	24	12	1	104.6	22.1867	218.28	174.32	4	85.621	84.227	23.6454
4.5	1	24	12	1	191.293	42.3067	169.853	42.9333	4	49.182	67.7	23.6454
4.5	1	24	12	1	184.787	6.46667	113.453	108.68	4	39.027	75.864	25.6158
4.5	1	24	12	1	95.96	16.3467	173.04	159.467	4	92.192	105.135	27.5863
4.5	1	24	12	1	90.9467	16.6	229.373	231.587	3	74.869	112.104	23.6454
4.5	1	24	12	1	115.373	10.9333	182.96	179.787	4	57.346	107.126	23.6454
4.5	1	24	12	1	115.347	14.04	166.72	147.387	4	44.204	100.356	27.5863
4.5	1	24	12	1	129.373	49.52	194.787	143.867	4	33.054	91.196	37.4385
4.5	1	24	12	1	126.867	22.3333	183.547	137.933	4	77.656	47.39	43.3498
4.5	1	24	12	1	121.587	17.28	183.333	155.213	4	56.749	44.005	43.3498
4.5	1	24	12	1	73.6133	38.7333	185.093	149.067	4	39.226	56.351	41.3794
4.5	1	24	12	1	135.427	20.9467	176.28	167.92	4	95.378	63.718	43.3498
4.5	1	24	12	1	164.413	6.68	88.32	26.4	4	101.351	73.076	51.2316
4.5	1	24	12	1	90.44	18.9333	206.653	161.36	4	101.55	91.595	39.4089
4.5	1	24	12	1	113.48	16.36	188.16	116.427	4	77.656	127.834	45.3203
4.5	1	24	12	1	151.96	7.73333	145.533	142.013	4	47.191	115.688	41.3794
4.5	1	24	12	1	46.2	15.6667	75.68	40.2533	4	71.683	79.448	112.315
4.5	1	24	12	1	73.1867	22.6267	77.7067	63.3733	4	61.129	87.612	112.315
4.5	1	24	12	1	56.3067	23.2133	97.6267	82.28	4	47.191	79.448	106.404
4.5	1	24	12	1	82.4133	21.8	130.307	128.027	4	49.581	59.736	102.463
4.5	1	24	12	1	58.44	9.04	83.6133	57.9867	4	87.015	83.63	104.434
4.5	1	24	12	1	49.3733	18.8	49.3467	29.44	4	87.413	70.488	104.434
4.5	1	24	12	1	58.2	11.2933	61.88	85.8933	1	93.785	58.74	94.5815
4.5	1	24	12	1	59.0533	14.2133	111.413	51.2933	4	101.351	78.054	92.611
4.5	1	24	12	1	43.8267	11.12	70.0933	71.4667	1	88.209	123.852	70.9361
4.5	1	24	12	1	64.4667	5.2	115.96	98.3333	4	70.488	129.626	66.9952
4.5	1	24	12	1	93.4533	2.16	22.2533	85.9067	1	74.669	96.174	15.7636
4.5	1	24	12	1	142.733	13.12	80.8533	213.12	1	61.727	99.957	17.734
4.5	1	24	12	1	81.7733	7.57333	205.413	196.987	4	63.718	119.869	31.5272
4.5	1	24	12	1	115.24	9.29333	187.373	124.573	4	105.931	107.922	53.2021
4.5	1	24	12	1	66.6533	6.52	105.533	116.907	1	56.749	120.467	53.2021
4.5	1	24	12	1	118.947	9.32	152.293	120.64	4	36.837	109.714	55.1725
4.5	1	24	12	1	127.533	8.54667	154.867	124.68	4	27.279	92.391	57.143
4.5	1	24	12	1	76.92	21.96	141.413	122.56	4	29.071	73.475	47.2907
4.5	1	24	12	1	130.387	18.6933	136.867	98.2667	4	28.076	60.731	59.1134
4.5	1	24	12	1	96.7867	15.6533	139.187	94.7333	4	41.218	44.204	59.1134
4.5	1	24	12	1	207.373	48.0133	163.427	51.6133	4	50.178	53.762	31.5272
4.5	1	24	12	1	90.0667	31.04	146.733	136.787	4	71.683	57.545	29.5567
4.5	1	24	12	1	89.8267	27.1067	214.72	193.053	4	84.625	65.51	29.5567
4.5	1	24	12	1	108.44	140.68	145.16	188.387	3	100.356	90.4	53.2021
4.5	1	24	12	1	56.4933	48.6133	36.9467	152.427	3	91.595	97.568	51.2316
4.5	1	24	12	1	87.9867	20.12	166.827	108.573	4	104.935	93.984	65.0248
4.5	1	24	12	1	76.7867	31.9733	57.7067	81.9867	3	79.05	103.542	59.1134
4.5	1	24	12	1	90.4933	28.1067	134.253	105.667	4	55.753	37.434	59.1134
4.5	1	24	12	1	110.147	24.9867	153.947	83.4933	4	71.484	38.231	65.0248
4.5	1	24	12	1	87.5867	51.2667	150.467	147.533	4	89.205	48.983	53.2021
4.5	1	24	12	1	116.947	28.5067	167.493	159.613	4	97.17	56.948	68.9656
4.5	1	24	12	1	69.16	24.92	92.7333	89.8667	4	72.479	43.408	90.6406
4.5	1	24	12	1	72.44	9.53333	93.4533	55.36	4	52.169	41.616	86.6997
4.5	1	24	12	1	66.52	9.10667	179.547	86.5867	4	104.736	75.665	74.877
4.5	1	24	12	1	36.9733	12.8133	42.3333	48.4	1	77.457	121.661	84.7292
4.5	1	24	12	1	54.5733	13.2133	57.8267	69.0133	1	58.939	118.276	80.7883
4.5	1	24	12	1	28.4667	3.57333	35.1467	34.8267	4	69.891	107.723	100.493
4.5	1	24	12	1	20.2	2.29333	30.1067	27.1467	4	83.232	99.559	100.493
4.5	1	24	12	1	34.6267	20.8133	61.24	86.6133	3	74.47	58.342	106.404
4.5	1	24	12	1	67.9867	6.50667	97.7333	64.4667	4	51.173	105.732	94.5815
4.5	1	24	12	1	87.64	16.4133	121.4	103.28	4	36.439	74.669	96.5519
4.5	1	24	12	1	76.28	30.48	77.2	84.04	3	44.204	92.59	102.463
4.5	1	24	12	1	74.2533	18.8933	107.267	57.3733	4	33.651	91.794	90.6406
4.5	1	24	12	1	61.4	9.01333	101.333	69.0533	4	38.828	109.515	74.877
4.5	1	24	12	1	51.3467	25.3467	91	97.2133	3	84.625	50.974	90.6406
4.5	1	24	12	1	68.0133	5.18667	107.96	57.4267	4	32.655	56.55	80.7883
4.5	1	24	12	1	80.6	7.42667	93.7333	48.4	4	25.487	75.267	78.8179
4.5	1	24	12	1	49.0533	5.58667	80.7867	64.3067	4	99.758	100.754	82.7588
4.5	1	24	12	1	44.9467	33.7333	108.213	119.293	3	87.413	48.585	74.877
4.5	1	24	12	1	70.3333	14.4	27.16	194	1	76.86	100.157	45.3203
4.5	1	24	12	1	107.613	20.1867	29.4133	188.773	3	86.617	112.9	39.4089
4.5	1	24	12	1	136.6	12.6267	31.8267	223.44	1	65.908	115.688	37.4385
4.5	1	24	12	1	83.7733	72.64	25.2267	170.427	3	96.572	106.329	39.4089
4.5	1	24	12	1	55.8	36.6	18.4667	121.707	3	84.625	107.126	49.2612
4.5	1	24	12	1	127.107	197.893	9.73333	33.7867	3	94.98	113.697	49.2612
4.5	1	24	12	1	190.493	47.2	6.86667	20.24	2	78.054	108.918	37.4385
4.5	1	24	12	1	79.08	75.2133	8.2	23.6267	2	77.855	109.316	65.0248
4.5	1	24	12	1	49.5333	7.50667	12.1467	80.6533	1	71.284	108.121	70.9361
4.5	1	24	12	1	41.2667	11.8	14.64	125.173	1	70.488	119.272	57.143
4.5	1	24	12	1	40.9467	76.1333	10.4667	55.36	3	64.913	114.891	70.9361
4.5	1	24	12	1	34.36	8.52	23.44	131.507	1	91.196	103.143	68.9656
4.5	1	24	12	1	85.2133	153.12	9.74667	27.44	3	99.758	100.157	55.1725
4.5	1	24	12	1	140.387	104.52	11.16	50.6267	3	96.373	109.316	59.1134
4.5	1	24	12	1	75.56	101.427	5.78667	19.9067	2	87.811	116.285	59.1134
4.5	1	24	12	1	34.6533	63.72	10.2	14.7067	2	79.448	115.489	76.8474
4.5	1	24	12	1	14.92	29.6133	7.68	67.8933	3	83.431	110.909	88.6701
4.5	1	24	12	2	132.04	20.7467	163.093	47.3333	4	90.997	73.873	19.7605
4.5	1	24	12	2	90.52	50.2	136.507	82.96	4	84.625	90.599	19.7605
4.5	1	24	12	2	82.2267	30.8533	103.093	34.2133	4	61.926	90.201	25.6886
4.5	1	24	12	2	104.2	84.6533	160	57.3867	4	58.541	70.886	25.6886
4.5	1	24	12	2	178.92	134.88	161.107	57.1467	4	47.788	79.847	33.5928
4.5	1	24	12	2	95.3733	41.3733	181.213	100.427	4	119.471	65.51	31.6168
4.5	1	24	12	2	96.36	13.16	136.68	91.5067	4	104.537	45.996	29.6407
4.5	1	24	12	2	122.6	29.6267	166.093	66.4267	4	93.984	59.536	27.6647
4.5	1	24	12	2	131.32	136.787	172.253	91.08	4	105.732	88.409	27.6647
4.5	1	24	12	2	97.7467	70.28	133.307	58.3733	4	93.387	98.564	27.6647
4.5	1	24	12	2	100.253	6.12	150.893	26.44	4	74.47	106.13	37.5449
4.5	1	24	12	2	190.28	6.6	179.733	91.8133	4	82.833	16.328	57.3054
4.5	1	24	12	2	126.52	11.1467	185.787	92.3733	4	99.957	12.544	61.2575
4.5	1	24	12	2	128.867	15.1467	184.04	101.96	4	126.838	27.478	63.2336
4.5	1	24	12	2	133.347	7.92	162.227	94.16	4	131.816	48.983	65.2096
4.5	1	24	12	2	113.24	11.0533	157.373	110.24	4	130.423	73.076	69.1617
4.5	1	24	12	2	90.0933	20.6	122.8	46.2	4	113.298	101.949	63.2336
4.5	1	24	12	2	99.32	6.41333	29.88	11.72	4	81.439	114.692	63.2336
4.5	1	24	12	2	83.08	5.54667	111.12	21.5067	4	52.966	104.736	51.3773
4.5	1	24	12	2	97.2133	34.52	135.947	43.8533	4	42.412	90.599	45.4491
4.5	1	24	12	2	104.467	21.3733	112.44	31.3467	4	36.638	72.678	51.3773
4.5	1	24	12	2	79.32	41.6933	104.8	46.9467	4	38.032	93.586	65.2096
4.5	1	24	12	2	89.5333	20.16	169.947	114.28	4	114.692	24.093	51.3773
4.5	1	24	12	2	98.6267	29.68	179.24	118.52	4	69.094	27.478	57.3054
4.5	1	24	12	2	104.947	17.48	133.573	63.5067	4	64.116	43.607	57.3054
4.5	1	24	12	2	114.253	128.333	130.707	123.747	4	73.076	53.961	47.4252
4.5	1	24	12	2	107.027	55.2133	178.173	84.3333	4	84.625	53.364	41.497
4.5	1	24	12	2	63.72	3.56	13.6667	45.9467	1	74.669	77.855	17.7844
4.5	1	24	12	2	55.0267	6.72	88.6933	24.3733	4	28.474	75.864	75.0899
4.5	1	24	12	2	63.0533	16.9467	98.1067	26.3467	4	26.881	59.935	79.042
4.5	1	24	12	2	103.4	21.72	124.027	39.48	4	30.465	45.399	82.9941
4.5	1	24	12	2	124.68	21.2667	136.52	61.1467	4	37.434	35.244	69.1617
4.5	1	24	12	2	94.0933	39.9733	131.453	52.0667	4	47.589	38.828	61.2575
4.5	1	24	12	2	58.84	17.2133	81.8533	35.5333	4	45.598	52.766	51.3773
4.5	1	24	12	2	125.4	35.12	134.48	41.3067	4	55.952	59.736	41.497
4.5	1	24	12	2	152.307	111.893	139.8	101.733	4	74.47	64.315	31.6168
4.5	1	24	12	2	89.9333	8.26667	142.613	124.333	4	83.63	39.625	45.4491
4.5	1	24	12	2	131.8	41.7733	136.44	60.8667	4	53.961	25.686	69.1617
4.5	1	24	12	2	107.613	8.74667	179.12	92.7467	4	68.895	14.337	73.1138
4.5	1	24	12	2	95	8.09333	154.4	96.0267	4	120.467	13.341	82.9941
4.5	1	24	12	2	122.093	5.70667	145.44	70.2133	4	98.962	7.965	79.042
4.5	1	24	12	2	64.0667	4.94667	145.293	97.0267	4	133.808	39.625	86.9461
4.5	1	24	12	2	140.92	7.81333	122.387	61.24	4	132.613	58.541	77.0659
4.5	1	24	12	2	59.08	5.16	87.08	66.6933	4	130.024	48.386	96.8264
4.5	1	24	12	2	100.253	4.56	112.28	63.48	4	130.024	58.342	98.8024
4.5	1	24	12	2	76.9467	7.17333	100.467	52.8267	4	125.046	68.497	108.683
4.5	1	24	12	2	81.24	11.08	85.8533	56.24	4	126.042	81.041	98.8024
4.5	1	24	12	2	95.5867	29.6133	129.72	73.7467	4	121.263	93.187	82.9941
4.5	1	24	12	2	112.093	41.7067	136.493	68.76	4	103.542	104.338	45.4491
4.5	1	24	12	2	124.067	10.28	160.4	87.4933	4	86.019	11.151	71.1378
4.5	1	24	12	2	59.1867	16.7067	65.5733	36.2133	4	110.312	92.789	114.611
4.5	1	24	12	2	69.1867	23.0533	77.3733	50.5067	4	104.139	85.621	128.443
4.5	1	24	12	2	65.6133	5.74667	95.72	50.8667	4	114.891	75.267	122.515
4.5	1	24	12	2	36.84	39.6933	87.0533	45.28	4	107.524	103.542	96.8264
4.5	1	24	12	2	71.9067	29.08	69.3067	26.3067	4	93.984	111.506	96.8264
4.5	1	24	12	2	70.7333	65.1067	89.64	36.8133	4	92.988	115.489	86.9461
4.5	1	24	12	2	99.0267	80.0667	95.3467	49.9867	4	62.523	113.099	77.0659
4.5	1	24	12	2	95.24	45.8	81.8133	37.2	4	46.395	104.139	77.0659
4.5	1	24	12	2	84.68	9.88	158.827	56.0267	4	118.675	84.824	41.497
4.5	1	24	12	2	69.1867	41.2667	127.44	29.8533	4	90.997	111.705	47.4252
4.5	1	24	12	2	98.7333	67.3867	146.813	45.04	4	30.863	53.563	63.2336
4.5	1	24	12	2	69.6667	52.64	84.4933	18.8133	4	36.439	39.226	96.8264
4.5	1	24	12	2	101.88	108.373	155.827	58.36	4	44.603	27.08	86.9461
4.5	1	24	12	2	142.627	7.08	164.987	87.64	4	57.744	19.115	92.8743
4.5	1	24	12	2	92.84	7.17333	119.04	66.5067	4	76.661	10.752	88.9222
4.5	1	24	12	2	66.3067	11.84	91.6133	79.48	4	65.51	25.686	114.611
4.5	1	24	12	2	62.76	24.6	85.9067	40.9067	4	48.386	32.058	108.683
4.5	1	24	12	2	48.7333	10.6133	70.4267	18.6933	4	43.806	47.191	116.587
4.5	1	24	12	2	42.76	17.3333	64.04	42.3467	4	54.957	45.598	126.467
4.5	1	24	12	2	92.76	6.78667	95.32	67.9733	4	69.691	42.81	134.371
4.5	1	24	12	2	35.2933	3.52	52.72	38.36	4	86.019	37.036	132.395
4.5	1	24	12	2	49.7733	2.56	79.32	61.1067	4	91.196	49.381	136.347
4.5	1	24	12	2	58.0933	5.29333	53.6667	28.52	4	83.63	59.935	142.276
4.5	1	24	12	2	94.2533	3.89333	95.48	64.1733	4	99.758	69.891	138.323
4.5	1	24	12	2	51.1333	25.08	95.56	59.9333	4	89.205	76.262	138.323
4.5	1	24	12	2	106.92	5.54667	32.1867	21.3867	4	78.254	77.656	134.371
4.5	1	24	12	2	46.2267	31.9867	88.2533	43.32	4	64.913	60.93	138.323
4.5	1	24	12	2	54.3333	16.9067	80.3467	41.92	4	61.328	76.462	134.371
4.5	1	24	12	2	58.76	48.5067	73.84	36.5733	4	80.444	90.201	132.395
4.5	1	24	12	2	53.0267	27.5733	60.5467	15.2533	4	89.603	95.378	126.467
4.5	1	24	12	2	44.52	22.2267	63.4667	23.1733	4	75.068	113.099	96.8264
4.5	1	24	12	2	56.4667	31.5867	70.1467	25.7467	4	77.059	104.935	116.587
4.5	1	24	12	2	46.7333	18.5067	75.4	24.6267	4	51.373	103.542	96.8264
4.5	1	24	12	2	55.32	77.6133	68.2133	39.6267	3	55.952	99.161	114.611
4.5	1	24	12	2	66.04	55.12	70.3733	32.7333	4	63.917	94.183	124.491
4.5	1	24	12	2	74.28	70.3867	84.64	65.3333	4	53.961	86.019	124.491
4.5	1	24	12	2	44.4133	2.04	54.1733	34.72	4	109.714	56.749	130.419
4.5	1	24	12	2	44.1733	3.17333	49.3867	38.1733	4	122.458	53.364	118.563
4.5	1	24	12	2	35.2933	3.61333	37.28	30	4	118.874	43.209	122.515
4.5	1	24	12	2	41.0533	19.0667	64.7333	38.5733	4	46.594	63.121	124.491
4.5	1	24	12	2	41.1067	4.38667	65.9067	21.5467	4	42.412	83.232	114.611
4.5	1	24	12	2	56.5467	3.34667	53.3733	24.0667	4	31.859	63.32	102.755
4.5	1	24	12	2	32.7867	3.44	42.6267	33.52	4	91.993	23.496	120.539
4.5	1	24	12	2	67.3733	6.12	95.2933	63.8933	4	81.439	13.938	104.731
4.5	1	24	12	2	40.1467	7.04	62.1067	42.1067	4	101.55	15.332	106.707
4.5	1	24	12	2	44.76	11.7333	71.56	46.6	4	123.254	32.257	110.659
4.5	1	24	12	2	22.3067	5.10667	26.9333	15.9467	4	108.121	32.855	128.443
4.5	1	24	12	2	117.24	9.44	157.933	105.693	4	95.577	26.682	43.4731
4.5	1	24	12	2	117.32	8.2	156.973	101.16	4	115.489	37.235	37.5449
4.5	1	24	12	2	96.4133	6.4	130.08	68.5733	4	121.064	16.726	96.8264
4.5	1	24	12	2	73.6133	4.85333	21.5067	114.293	1	107.723	30.067	67.1857
4.5	1	24	12	2	79.4	6.44	14.9733	132.147	1	92.192	20.111	90.8982
4.5	1	24	12	2	50.1467	12.8933	9.72	92.24	1	101.351	27.478	92.8743
4.5	1	24	12	2	47.4	2.8	12.8	90.32	1	112.303	37.633	86.9461
4.5	1	24	12	2	74.5733	116.48	6.13333	14.6533	2	93.387	13.938	86.9461
4.5	1	24	12	2	83.2933	165.027	5.36	12.9333	2	115.29	18.12	75.0899
4.5	1	24	12	2	100.413	139.853	20.88	41.3467	3	124.648	28.474	77.0659
4.5	1	24	12	2	48.2	82.4933	3.70667	10.7067	2	111.307	21.704	102.755
4.5	1	24	12	2	46.2533	62.56	3.13333	13.76	2	113.697	25.885	84.9701
4.5	1	24	12	2	97.4267	102.08	6.08	18.6533	2	122.259	34.049	86.9461
4.5	1	24	12	2	86.9733	84.7067	5.65333	13.68	2	104.736	15.332	84.9701
4.5	1	24	12	2	58.44	54.8933	7.18667	23.88	2	124.051	35.841	96.8264
4.5	1	24	12	2	59.4	62.92	5.30667	21.52	2	120.467	28.872	96.8264
4.5	1	24	12	2	127.027	95.7333	23.8667	60.3867	3	103.542	14.934	73.1138
4.5	1	48	3	1	32.44	14.4267	92.88	33.24	4	112.069	87.64	43
4.5	1	48	3	1	32.24	15.72	104.907	39.5067	4	117.861	83.863	42
4.5	1	48	3	1	37.2667	10.5067	103.467	26.6267	4	121.639	67.997	41
4.5	1	48	3	1	26.6533	8.52	102.947	22.36	4	106.025	67.241	42
4.5	1	48	3	1	30.52	3.96	66.4133	28.8933	4	99.477	95.447	41
4.5	1	48	3	1	27.3067	8.61333	86.68	24.3867	4	96.203	53.642	39
4.5	1	48	3	1	22.3467	4.53333	32.68	6.04	4	84.366	74.041	44
4.5	1	48	3	1	42.6267	5.17333	25.7333	3.05333	4	77.567	80.589	43
4.5	1	48	3	1	36.6933	15.6533	89.7333	22.72	4	116.098	108.795	39
4.5	1	48	3	1	36	18.9067	121.147	36.5467	4	125.416	108.543	35
4.5	1	48	3	1	51.2933	11.04	141.253	55.0667	4	119.876	121.89	34
4.5	1	48	3	1	36.8933	3.4	60.7333	27.9733	4	103.254	121.135	33
4.5	1	48	3	1	53.9067	12.8	135.093	29.7467	4	103.002	111.565	22
4.5	1	48	3	1	39.8267	17.5067	153.12	33.6	4	106.025	106.025	18
4.5	1	48	3	1	47.32	26.56	157.32	54.6667	4	98.469	101.24	16
4.5	1	48	3	1	56.76	7.18667	134.32	9.2	4	84.115	101.491	16
4.5	1	48	3	1	33.3467	24.08	145.24	31.4533	4	100.232	82.603	10
4.5	1	48	3	1	73.92	44.3733	75.6933	18.8267	4	90.411	82.1	13
4.5	1	48	3	1	68.2133	32.04	132.413	36.64	4	79.581	74.796	9
4.5	1	48	3	1	36.9467	11.6133	186.853	15.9467	4	70.515	92.929	15
4.5	1	48	3	1	33.4933	5.88	120.28	17.0667	4	60.693	82.603	23
4.5	1	48	3	1	87.3467	14.9867	160.933	20.92	4	61.197	72.782	24
4.5	1	48	3	1	102.853	39.3733	97.7867	24.7867	4	64.219	64.471	30
4.5	1	48	3	1	47.9333	16.04	158.933	8.73333	4	67.997	49.864	21
4.5	1	48	3	1	75.7067	64	157.173	37.24	4	79.33	49.612	16
4.5	1	48	3	1	62.5733	11.9733	53.8667	4.74667	4	82.855	42.309	26
4.5	1	48	3	1	67.84	22.4533	84.1467	14.36	4	101.743	38.28	26
4.5	1	48	3	1	39.2267	22.3467	146.867	18.1867	4	93.433	42.309	18
4.5	1	48	3	1	44.2133	45.3067	150.547	24.6133	4	111.565	54.901	15
4.5	1	48	3	1	31.2667	47.3867	134.533	24.0133	4	99.729	52.383	13
4.5	1	48	3	1	40.3867	21.3467	116.053	49.16	4	95.699	61.701	9
4.5	1	48	3	1	39.6	28.48	170.24	33.08	4	108.543	67.241	10
4.5	1	48	3	1	39.6533	27.2267	165.2	36	4	122.646	76.811	14
4.5	1	48	3	1	40.8933	25.0933	131.253	34.32	4	114.083	90.159	13
4.5	1	48	3	1	52.6133	17.3733	149.053	30.68	4	113.832	117.861	26
4.5	1	48	3	1	36.5067	7.57333	153.893	31.6133	4	128.942	115.091	26
4.5	1	48	3	1	37.76	22.8133	135.067	43.48	4	126.172	94.944	20
4.5	1	48	3	1	62.2667	21.5733	188.68	75.7067	4	133.223	99.729	28
4.5	1	48	3	1	47.0667	30.8667	179.093	22.5867	4	124.409	64.975	17
4.5	1	48	3	1	86.8133	45.1867	104.467	39.5067	4	69.76	55.657	25
4.5	1	48	3	1	39.4267	9.96	77.04	18.4933	4	63.967	85.626	32
4.5	1	48	3	1	36.36	7.78667	53.04	16.9867	4	68.249	95.195	32
4.5	1	48	3	1	26.8533	7.48	148.347	16	4	73.285	107.787	23
4.5	1	48	3	1	93.7467	67.24	173.32	60.5333	4	83.359	113.58	28
4.5	1	48	3	1	48.6667	7.82667	55.1867	11.3733	4	88.144	106.276	38
4.5	1	48	3	1	51.88	56.1867	162.52	50.1067	4	93.181	116.602	26
4.5	1	48	3	1	42.04	10.48	89.3867	37.8933	4	127.683	89.403	38
4.5	1	48	3	1	64.8667	19.6533	168.973	65.9867	4	136.749	84.87	28
4.5	1	48	3	1	43.2267	7.97333	123.533	28.7867	4	125.668	118.868	27
4.5	1	48	3	1	66.3733	31.8667	117.293	15.3867	4	65.227	69.508	13
4.5	1	48	3	1	20.16	13.3067	76	15.84	4	108.795	47.85	34
4.5	1	48	3	1	38.3067	24.1333	107.293	7.10667	4	120.128	41.805	24
4.5	1	48	3	1	65.32	16.4933	99.7067	38.8267	4	122.142	50.368	31
4.5	1	48	3	1	46.0133	37.92	169.347	18.08	4	114.587	47.094	18
4.5	1	48	3	1	55.6	26.0133	149.467	24.08	4	133.475	61.953	23
4.5	1	48	3	1	69.76	17.0267	99.4133	34.0533	4	130.957	56.16	27
4.5	1	48	3	1	63.1733	10.1467	63.8267	15.1467	4	122.898	63.212	35
4.5	1	48	3	1	77.3467	5.68	51.1333	12.3333	4	138.512	69.508	31
4.5	1	48	3	1	49.3867	16.56	155.813	38.5867	4	138.008	75.3	21
4.5	1	48	3	1	80.5867	83.92	33.36	62.8267	3	89.151	70.011	12
4.5	1	48	3	1	106.88	12.1467	43.9733	5.29333	4	69.004	67.241	37
4.5	1	48	3	1	70.2133	109.28	12.7733	20.2667	2	79.833	88.144	16
4.5	1	48	3	1	59.92	102.32	15.8267	30.72	3	81.092	80.337	13
4.5	1	48	3	1	67.4	100.213	23.7733	25.0667	2	69.76	77.819	17
4.5	1	48	3	1	115.48	89.3333	73.6	27.1867	3	64.723	67.241	20
4.5	1	48	3	1	122.2	118.667	23.12	32.1067	3	86.633	67.493	15
4.5	1	48	3	1	76.68	126.44	12.9333	19.12	2	85.122	56.412	15
4.5	1	48	3	1	82.88	75.2667	23.5333	11.1733	2	74.041	69.508	17
4.5	1	48	3	1	65.9467	79.8133	48.3333	28.8	3	92.173	62.708	13
4.5	1	48	3	1	85.8667	99.36	32.3867	82.72	3	77.567	61.197	17
4.5	1	48	3	1	101.8	103.733	37.72	15.0267	2	84.366	48.857	19
4.5	1	48	3	2	36.7067	5.45333	105.44	6.18667	4	105.017	102.751	58
4.5	1	48	3	2	46	3.44	98.76	8.37333	4	92.425	93.181	57
4.5	1	48	3	2	33.56	2.92	62.3867	7.68	4	101.491	83.107	56
4.5	1	48	3	2	54.2267	7.29333	90.3333	8.22667	4	129.446	88.648	56
4.5	1	48	3	2	24.56	4.10667	75.84	10.6267	4	97.714	115.343	55
4.5	1	48	3	2	34.76	2.78667	79.5067	16.1733	4	123.15	116.854	57
4.5	1	48	3	2	43.9467	12.76	95.7733	15.4533	4	126.424	132.468	51
4.5	1	48	3	2	61.5067	10.72	84.9733	9.30667	4	116.35	144.304	48
4.5	1	48	3	2	22.92	3.53333	41.0667	3.38667	4	105.521	130.705	53
4.5	1	48	3	2	22.0133	2.33333	36.8267	7.42667	4	86.381	117.357	53
4.5	1	48	3	2	39.4667	4.86667	80.68	8.6	4	74.796	104.01	52
4.5	1	48	3	2	95.2267	4.86667	92.12	6.85333	4	70.767	86.129	46
4.5	1	48	3	2	64.04	12.2	163.933	12.9733	4	69.004	91.418	33
4.5	1	48	3	2	71.1733	5.28	181.12	17.4933	4	59.182	121.387	36
4.5	1	48	3	2	77.7733	4.06667	83.7333	9.53333	4	62.96	110.81	42
4.5	1	48	3	2	66.8533	9.2	103.227	9.18667	4	72.782	145.563	38
4.5	1	48	3	2	64.8533	16.6667	148.307	20.0133	4	95.699	151.104	38
4.5	1	48	3	2	67.7467	31.6933	111.653	35.5467	4	99.729	146.067	30
4.5	1	48	3	2	52.84	16.9333	136.56	30.56	4	113.076	145.563	35
4.5	1	48	3	2	42.9733	36.5467	159.507	28.04	4	116.098	135.994	30
4.5	1	48	3	2	35.56	19.7467	98.9467	9.53333	4	118.868	124.913	27
4.5	1	48	3	2	40.9733	12.9733	108.667	32.64	4	124.409	111.565	27
4.5	1	48	3	2	29.7067	5.28	95.52	10.5467	4	112.069	97.714	25
4.5	1	48	3	2	44.6133	8.76	77.6	8.58667	4	97.966	122.394	25
4.5	1	48	3	2	29.32	20.5333	90.84	12.4667	4	85.122	109.802	25
4.5	1	48	3	2	29.0667	22.2	105	24.8933	4	96.203	90.662	25
4.5	1	48	3	2	55.8667	6.69333	101.2	8.8	4	71.523	111.061	27
4.5	1	48	3	2	77.3333	37.5867	129.053	31.2	4	81.596	140.275	28
4.5	1	48	3	2	28.4133	12.7733	94.4267	8.88	4	87.388	81.848	28
4.5	1	48	3	2	41.4	42.2267	108.053	7.92	4	109.298	75.3	31
4.5	1	48	3	2	36.0667	30.76	112.747	15.96	4	121.135	82.352	28
4.5	1	48	3	2	32.3467	11.44	88.3467	34.2	4	140.023	96.203	29
4.5	1	48	3	2	48.3467	16.3467	130.613	39.32	4	140.275	87.388	32
4.5	1	48	3	2	58.32	6.02667	150.013	33.1333	4	146.319	92.929	42
4.5	1	48	3	2	59.1333	44.0533	190.947	11.2533	4	142.793	126.424	44
4.5	1	48	3	2	56.8267	33.68	158.493	16.9867	4	146.319	117.861	42
4.5	1	48	3	2	33.28	13.44	120.973	37.36	4	133.223	123.905	32
4.5	1	48	3	2	96.8133	27.8	202.773	29.7333	4	130.957	138.764	37
4.5	1	48	3	2	72.56	19.1333	135.933	22.32	4	124.661	143.297	42
4.5	1	48	3	2	138.547	100.093	59.4933	36.76	3	99.98	133.223	32
4.5	1	48	3	2	59.9867	26.64	109.68	30.8667	4	105.773	149.341	42
4.5	1	48	3	2	30.12	2.01333	60.5467	7.62667	4	108.291	70.515	52
4.5	1	48	3	2	50.8933	61.48	122.253	31.56	4	106.025	61.953	44
4.5	1	48	3	2	59.1333	24.84	121.213	20.6267	4	98.721	64.219	37
4.5	1	48	3	2	42.8933	14.6533	100.653	11.9733	4	114.335	60.945	41
4.5	1	48	3	2	40.4	6.41333	103.52	11.6267	4	121.135	66.486	44
4.5	1	48	3	2	52.3333	5.81333	136.573	12.7467	4	129.446	71.523	33
4.5	1	48	3	2	105.467	11.8667	137.36	35.9733	4	133.475	71.271	42
4.5	1	48	3	2	37.44	3.54667	70.7733	17.72	4	134.734	82.603	51
4.5	1	48	3	2	41.5867	5	89.3467	10.4933	4	82.1	80.841	51
4.5	1	48	3	2	51.0933	19.6267	107.253	14.3867	4	79.33	71.774	40
4.5	1	48	3	2	54.2267	31.6133	142.44	12.3467	4	84.618	74.293	32
4.5	1	48	3	2	76.4267	26.0667	86.16	34.92	4	88.144	70.263	44
4.5	1	48	3	2	146.28	24.2267	44.8933	11.32	4	91.922	135.238	52
4.5	1	48	3	2	72.8667	4.54667	74.2667	23.2267	4	142.29	114.335	53
4.5	1	48	3	2	156.667	54.84	38.2133	65.28	3	74.545	119.624	30
4.5	1	48	3	2	117.413	95	41.1867	45.6667	3	95.447	127.431	30
4.5	1	48	3	2	80.28	112.92	10.88	15.8133	2	70.011	125.668	30
4.5	1	48	3	2	101.293	149.893	38.1067	45.36	3	97.966	134.986	28
4.5	1	48	3	2	144.76	102.4	91.88	45.7867	3	99.729	143.549	41
4.5	1	48	3	2	76.64	97.0667	18.9733	48.52	3	85.626	121.135	31
4.5	1	48	3	2	79.7867	69.68	24.04	42.6	3	82.603	145.06	34
4.5	1	48	3	2	97.24	73.2133	70.4267	24.3733	2	75.804	138.764	32
4.5	1	48	3	2	224.373	91.0667	20.8133	34.5467	3	84.87	131.964	33
4.5	1	48	3	2	168	128.027	19.7733	52.1333	3	89.403	141.786	35
4.5	1	48	3	2	109.573	132.333	21.0267	23.8533	2	66.989	122.646	35
4.5	1	48	3	3	62.6667	23.2533	162.347	23.3733	4	112.572	85.626	21
4.5	1	48	3	3	98.8667	83.4933	139.36	75.0267	4	113.832	99.225	21
4.5	1	48	3	3	43.9733	7.09333	150.48	25	4	130.705	96.707	22
4.5	1	48	3	3	90.6133	38.44	115.213	29.12	4	93.684	85.626	19
4.5	1	48	3	3	76.96	52.9333	112.867	43.68	4	86.381	101.24	18
4.5	1	48	3	3	112.613	55.12	154.373	25.08	4	95.951	111.817	20
4.5	1	48	3	3	91.8667	59.6533	169.707	57.3867	4	109.802	126.424	23
4.5	1	48	3	3	97.88	4.73333	64.6933	6.84	4	127.935	115.091	25
4.5	1	48	3	3	62.04	20.92	174.28	36.6933	4	143.549	111.565	30
4.5	1	48	3	3	73.72	16.7067	156.973	27.64	4	141.03	91.922	27
4.5	1	48	3	3	106.853	45.76	196.373	53.72	4	147.326	96.958	34
4.5	1	48	3	3	76.2133	69.4133	178.76	23.16	4	144.052	81.848	31
4.5	1	48	3	3	84.16	64.7867	150.64	30.8	4	149.593	83.359	37
4.5	1	48	3	3	27.16	19.64	122.373	45.3333	4	140.275	76.811	39
4.5	1	48	3	3	43.4533	4.90667	139.467	23.6267	4	131.964	82.352	45
4.5	1	48	3	3	30.7867	11.8267	105.747	8.89333	4	121.135	77.063	49
4.5	1	48	3	3	23.2267	14.6667	91.6	8.16	4	123.402	97.21	49
4.5	1	48	3	3	25.1333	22.92	65.2933	12.08	4	106.025	82.855	50
4.5	1	48	3	3	46.92	10.5867	69.36	13.0533	4	95.195	93.936	51
4.5	1	48	3	3	33.76	8.96	47.48	9.01333	4	101.995	99.729	51
4.5	1	48	3	3	17.0267	14.52	68.5333	18.5467	4	82.352	83.611	44
4.5	1	48	3	3	32.3333	15.84	91.5733	16.24	4	90.159	68.752	46
4.5	1	48	3	3	73.32	12.8667	62.32	18.6133	4	83.107	107.032	46
4.5	1	48	3	3	29.12	5.69333	79.0933	7.2	4	66.738	100.988	29
4.5	1	48	3	3	61.44	7.09333	92.4933	5.32	4	75.804	91.67	26
4.5	1	48	3	3	45.72	46.8267	130.867	25.3067	4	66.234	90.159	35
4.5	1	48	3	3	73.7333	9.88	139.613	10.9467	4	67.241	110.81	36
4.5	1	48	3	3	61.68	37.52	158.307	29.2533	4	74.796	112.824	27
4.5	1	48	3	3	80.7467	36.4	112.16	63.12	4	77.819	118.113	36
4.5	1	48	3	3	117.467	27.04	145.72	10.8133	4	87.64	128.69	30
4.5	1	48	3	3	100.747	2.65333	78.3867	5.41333	4	118.365	132.971	34
4.5	1	48	3	3	39.44	3.89333	61.4667	4.26667	4	128.942	121.89	34
4.5	1	48	3	3	46.5333	15.5867	146.013	21.08	4	102.247	70.263	20
4.5	1	48	3	3	44.8667	24.88	109.067	12.08	4	112.321	67.241	23
4.5	1	48	3	3	45.7467	15.0267	184.8	19.0667	4	122.142	71.523	21
4.5	1	48	3	3	45.2933	33.76	164.053	30.3467	4	133.979	73.034	26
4.5	1	48	3	3	54.1733	24.0533	135.467	21.2533	4	119.876	57.923	26
4.5	1	48	3	3	68.8933	5.97333	145.627	11.28	4	100.736	56.916	24
4.5	1	48	3	3	52.36	36.7467	130.84	16.5733	4	97.462	50.368	29
4.5	1	48	3	3	82.72	51.64	159.093	21.2267	4	89.403	52.886	31
4.5	1	48	3	3	69.4933	9.78667	123.787	12.64	4	79.078	63.212	30
4.5	1	48	3	3	79.2133	5.37333	143.387	9.14667	4	76.307	76.559	27
4.5	1	48	3	3	62.0133	11.1467	117.12	11.48	4	68.5	79.078	33
4.5	1	48	3	3	153.853	10.64	111.693	9.28	4	73.285	94.44	42
4.5	1	48	3	3	103.587	5.08	96.6667	6.36	4	128.438	114.587	42
4.5	1	48	3	3	54.5333	22.6267	137.053	32.84	4	136.245	93.181	44
4.5	1	48	3	3	25.3067	6.04	69.28	25.12	4	107.787	61.953	48
4.5	1	48	3	3	44.76	17.4267	82.84	25.56	4	105.017	51.627	43
4.5	1	48	3	3	35.96	18.1333	149.547	43.1333	4	108.291	43.568	33
4.5	1	48	3	3	32.7467	14.8533	132.827	37.2133	4	116.602	49.109	30
4.5	1	48	3	3	43.16	36.2	109.467	29.8133	4	123.15	49.361	39
4.5	1	48	3	3	52.1467	15.6667	89.6667	26.24	4	130.705	55.657	42
4.5	1	48	3	3	87.68	7.53333	172.187	29.6667	4	138.512	61.197	32
4.5	1	48	3	3	60.72	58.9733	136.48	38.8667	4	145.06	68.249	36
4.5	1	48	3	3	63.72	4.2	91.8267	9.66667	4	71.774	71.271	38
4.5	1	48	3	3	65.52	3.08	149.827	15.8667	4	84.366	69.256	23
4.5	1	48	3	3	53.8933	11.28	17.3467	3.92	4	109.298	116.602	45
4.5	1	48	3	3	170.8	11.8	25.6533	3.08	4	93.433	121.89	42
4.5	1	48	3	3	34.5733	2	43.2133	3.45333	4	129.698	66.738	46
4.5	1	48	3	3	43.0267	2.88	54.1733	3.56	4	127.683	123.15	37
4.5	1	48	3	3	71.1067	102.333	19.32	38.6933	3	105.269	88.144	21
4.5	1	48	3	3	72.3333	107.68	18.12	53.64	3	104.765	99.729	19
4.5	1	48	3	3	74.16	137.613	19.0533	21.84	2	109.802	107.284	19
4.5	1	48	3	3	114.333	67.2133	65.0533	27.36	3	96.958	84.87	22
4.5	1	48	3	3	72.08	109.987	26.5333	74.9467	3	86.129	88.396	26
4.5	1	48	3	3	149.387	152.547	52.1467	66.5733	3	89.403	93.684	25
4.5	1	48	3	3	79.56	105.36	29.44	39.1333	3	82.603	104.262	25
4.5	1	48	3	3	113.453	153.227	21.8533	41.32	3	81.344	108.291	30
4.5	1	48	3	3	86.3333	68.4933	21.3467	35.48	3	82.1	119.12	32
4.5	1	48	3	3	81.2267	84.8667	9.74667	13.6667	2	97.714	129.949	32
4.5	1	48	3	3	194.347	156.28	24.1467	18.56	2	104.514	120.379	32
4.5	1	48	3	3	185.427	138.227	19.3067	19.4933	2	98.721	117.861	28
4.5	1	48	3	3	210.52	127.8	39.1733	20.2	2	92.173	110.81	29
4.5	1	48	3	3	48.4267	118.053	61.6667	107.733	3	123.653	107.536	25
4.5	1	48	3	3	69.12	136.72	26.88	77.2	3	116.35	112.824	24
4.5	1	48	3	3	130.147	129.32	14.9333	16.2933	2	97.966	96.958	25
4.5	1	48	3	3	104.787	112.093	22.6	8.53333	2	92.677	102.499	26
4.5	1	48	3	3	96.6	110.773	37.3067	24.8267	2	115.594	125.164	29
4.5	1	48	3	3	92.3867	91.5733	16.92	20.8533	2	109.298	117.357	23
4.5	1	48	3	3	141.907	155.52	77.6	128.133	3	85.877	96.958	25
4.5	1	48	3	4	35.4267	14.3733	134.8	28.56	4	100.988	103.506	12
4.5	1	48	3	4	76.4667	8.08	198.173	27.44	4	88.396	96.203	14
4.5	1	48	3	4	43.6267	25.8	184.213	30.1333	4	102.499	90.662	14
4.5	1	48	3	4	70.6667	7.81333	146.547	18.6933	4	92.677	84.115	16
4.5	1	48	3	4	55.9733	30.2667	175.84	24.8933	4	82.855	79.833	18
4.5	1	48	3	4	59.2533	10.5867	173.28	40.8933	4	75.804	91.166	15
4.5	1	48	3	4	56.72	18.92	173.707	22.4533	4	67.493	99.477	20
4.5	1	48	3	4	78.0133	14.8533	174.88	14.84	4	98.973	126.424	17
4.5	1	48	3	4	48.0267	12	159.707	37.0267	4	87.64	124.913	14
4.5	1	48	3	4	48.6133	8.25333	175.347	28.0133	4	96.455	114.335	13
4.5	1	48	3	4	40.24	7.54667	133.027	15.2933	4	109.047	111.817	16
4.5	1	48	3	4	67.7733	7.46667	178.067	34.1067	4	115.091	117.106	20
4.5	1	48	3	4	59.4267	23.7467	162.16	25.9333	4	115.594	125.92	22
4.5	1	48	3	4	58.84	18.3867	156.173	34.6933	4	118.365	132.216	27
4.5	1	48	3	4	49.68	23.4533	136.28	24.12	4	106.78	137.001	26
4.5	1	48	3	4	97.1467	30.4667	223.627	49.28	4	97.966	141.786	30
4.5	1	48	3	4	56.5067	11.8933	131.467	24.24	4	94.944	134.482	23
4.5	1	48	3	4	77.4533	10.6667	140.653	33.1333	4	82.603	130.453	20
4.5	1	48	3	4	53.5733	11.0933	127.56	34.72	4	78.07	136.245	24
4.5	1	48	3	4	61.1333	8.57333	199.907	64.04	4	73.034	140.023	30
4.5	1	48	3	4	77.8	8.93333	189.373	22.9733	4	83.863	149.593	30
4.5	1	48	3	4	44.4667	6.68	149.187	22.4667	4	71.774	129.949	22
4.5	1	48	3	4	59.16	2.84	88.32	13.6133	4	75.804	111.313	13
4.5	1	48	3	4	63.32	3.88	177.867	31.7333	4	114.839	93.936	16
4.5	1	48	3	4	95.6267	53.6533	149.213	25.7067	4	99.98	79.581	18
4.5	1	48	3	4	86.5067	72.2133	132.8	35.9733	4	85.626	70.767	18
4.5	1	48	3	4	80.92	11.84	161	20.7867	4	70.515	81.092	21
4.5	1	48	3	4	45.48	7.46667	128.893	31.6933	4	73.537	68.5	29
4.5	1	48	3	4	52.44	9.30667	127.493	35.0933	4	79.581	63.967	25
4.5	1	48	3	4	64.1467	5.14667	165.04	16.68	4	98.973	60.19	27
4.5	1	48	3	4	82.4267	39.6267	148.48	33.84	4	112.824	72.53	22
4.5	1	48	3	4	58.1867	12.9733	142.253	56.3867	4	120.128	85.626	20
4.5	1	48	3	4	46.7733	9.26667	150.133	34.84	4	120.631	105.017	21
4.5	1	48	3	4	55.0267	21.5067	161.787	30.3067	4	124.157	113.328	26
4.5	1	48	3	4	31.3467	5.41333	117.72	25.1467	4	105.269	120.631	39
4.5	1	48	3	4	37.0667	3.25333	83.6533	32.3867	4	91.922	117.861	41
4.5	1	48	3	4	48.9333	4.53333	130.573	22.6	4	87.64	109.298	43
4.5	1	48	3	4	54.12	4.66667	106.827	20.3333	4	91.922	100.484	43
4.5	1	48	3	4	50.0667	5.53333	89.76	23.04	4	88.396	91.922	40
4.5	1	48	3	4	88.0133	27.88	62.0267	11.9867	4	85.877	79.33	37
4.5	1	48	3	4	38.5067	5.26667	83.96	12.8133	4	72.278	90.411	37
4.5	1	48	3	4	43.7733	14.32	95.5467	21.9867	4	118.365	120.883	30
4.5	1	48	3	4	36.5733	10.5067	74.9733	18.3733	4	108.543	129.446	33
4.5	1	48	3	4	64.2133	4.6	75.64	21.3333	4	95.447	128.942	38
4.5	1	48	3	4	30.28	2.02667	80.4267	68.9867	4	82.855	122.646	38
4.5	1	48	3	4	132.333	13.44	124.573	43.9467	4	80.841	130.957	35
4.5	1	48	3	4	105.973	11.6133	100.84	24.2533	4	59.434	103.254	23
4.5	1	48	3	4	32.9733	20.6667	140.013	30.4933	4	57.671	94.188	29
4.5	1	48	3	4	46.9067	12.44	178	26.24	4	63.715	86.885	26
4.5	1	48	3	4	53.0667	9.18667	106.12	13.0533	4	69.256	73.537	26
4.5	1	48	3	4	72.8933	9.08	126.12	24.3733	4	118.113	79.33	29
4.5	1	48	3	4	43.04	4.85333	92.5467	17.6267	4	104.262	90.159	38
4.5	1	48	3	4	47.3467	9.89333	97.3867	22.8933	4	106.025	101.743	40
4.5	1	48	3	4	28.1067	13.84	89.4933	19.5867	4	112.824	101.743	36
4.5	1	48	3	4	103.693	5.97333	132.613	11.1867	4	123.402	102.751	31
4.5	1	48	3	4	118.933	17.1467	152.12	40.5867	4	120.379	94.44	26
4.5	1	48	3	4	113.2	23.5467	189	68.7467	4	122.142	87.137	28
4.5	1	48	3	4	71.52	16.2133	89.3467	20.9333	4	111.817	117.106	36
4.5	1	48	3	4	102.667	14.7067	145.613	24.1867	4	119.876	111.565	33
4.5	1	48	3	4	55.9467	9.09333	81.48	40.0267	4	113.832	88.899	36
4.5	1	48	3	4	18.9467	4.85333	70.0933	17.2533	4	73.285	106.025	40
4.5	1	48	3	4	39.6533	2.88	71.0667	12.7467	4	65.982	103.254	35
4.5	1	48	3	4	58.0667	1.84	72	8.30667	4	72.782	120.631	18
4.5	1	48	3	4	188.373	42.1067	68.6667	18.6933	4	99.98	77.567	35
4.5	1	48	3	4	60.4267	25.3733	60.1333	9.18667	4	89.655	64.471	34
4.5	1	48	3	4	173.587	178.493	96.72	46.64	3	98.469	73.537	20
4.5	1	48	3	4	105.093	121.987	35.8267	12.5067	2	103.506	81.848	24
4.5	1	48	3	4	170.28	140.373	60.5733	16.3867	2	82.352	69.76	28
4.5	1	48	3	4	129.507	147.12	88.3333	48.7733	3	87.388	73.537	21
4.5	1	48	3	4	55.1333	98.64	28	8.2	2	92.929	63.464	27
4.5	1	48	12	2	193.587	3.38667	245.627	73.8	4	89.244	101.143	29.9979
4.5	1	48	12	2	146.693	6.54667	173.973	75.16	4	91.156	86.269	29.9979
4.5	1	48	12	2	220	1.96	166.667	7.82667	4	94.131	73.095	29.9979
4.5	1	48	12	2	243.187	2.74667	190.12	59.9467	4	69.483	79.682	29.9979
4.5	1	48	12	2	229.84	1.28	174.413	20.8133	4	66.083	95.406	31.9977
4.5	1	48	12	2	190.813	8.90667	188.813	70.0267	4	74.157	114.317	31.9977
4.5	1	48	12	2	253.587	2.17333	210.307	18.5867	4	99.443	124.304	33.9976
4.5	1	48	12	2	252.413	1.96	194.92	45.9067	4	110.492	103.693	33.9976
4.5	1	48	12	2	248.053	3.05333	229.373	31.64	4	122.391	100.718	41.997
4.5	1	48	12	2	201.28	3.61333	169.107	57.08	4	126.003	85.844	47.9966
4.5	1	48	12	2	227.027	2.78667	186.173	28.7867	4	114.742	68.42	41.997
4.5	1	48	12	2	255	6.53333	174.36	63.72	4	117.292	119.204	45.9967
4.5	1	48	12	2	253.693	4.02667	234.92	32.8933	4	109.855	134.078	53.9961
4.5	1	48	12	2	227.32	2.78667	187.347	48.5867	4	132.591	103.905	57.9959
4.5	1	48	12	2	254.613	54.52	252.76	80.12	4	97.318	53.971	35.9974
4.5	1	48	12	2	217.76	1.72	120.88	14.2267	4	70.12	51.421	29.9979
4.5	1	48	12	2	212.053	3.56	211.627	15.48	4	48.022	68.208	31.9977
4.5	1	48	12	2	214.947	4.22667	241.893	27.1333	4	42.497	85.206	37.9973
4.5	1	48	12	2	201.067	2.32	134.933	10.4	4	50.571	110.067	39.9971
4.5	1	48	12	2	240.107	10.84	178.467	32.04	4	54.396	126.853	43.9969
4.5	1	48	12	2	200.467	4.18667	155.747	74.8933	4	60.346	136.84	53.9961
4.5	1	48	12	2	253.707	0.92	67.9733	54.5067	4	76.919	135.565	41.997
4.5	1	48	12	2	248.68	1.76	121.453	12.3733	4	40.585	124.304	61.9956
4.5	1	48	12	2	232.027	2.05333	143.347	16.6933	4	34.635	100.293	51.9963
4.5	1	48	12	2	247.573	1.96	127.707	12.52	4	30.81	72.032	53.9961
4.5	1	48	12	2	249.4	2.58667	98.5867	14.3467	4	45.684	45.259	53.9961
4.5	1	48	12	2	245.107	7.04	104.733	7.98667	4	66.508	32.085	45.9967
4.5	1	48	12	2	213.653	2.24	190.64	13.6267	4	90.306	36.122	51.9963
4.5	1	48	12	2	118.427	4.28	182.28	52.9333	4	107.73	48.447	45.9967
4.5	1	48	12	2	185.547	4.61333	205.453	58.0667	4	120.266	51.846	59.9957
4.5	1	48	12	2	241.147	1.76	181.253	65.6933	4	133.228	69.695	67.9951
4.5	1	48	12	2	176.84	2.52	173.773	18.3733	4	137.69	87.119	77.9944
4.5	1	48	12	2	195.92	1.92	150.133	21.76	4	138.753	94.131	85.9939
4.5	1	48	12	2	176.987	2.09333	138.813	59.8667	4	134.078	117.079	89.9936
4.5	1	48	12	2	120.04	1.6	83.44	4.8	4	127.491	123.029	113.992
4.5	1	48	12	2	127.44	1.4	90.7333	15.12	4	113.892	135.14	115.992
4.5	1	48	12	2	152.133	1.56	67.2933	7.09333	4	93.281	144.277	117.992
4.5	1	48	12	2	108.053	6.22667	105.427	19.4267	4	72.032	138.328	123.991
4.5	1	48	12	2	140.467	4	101.88	31.0933	4	69.907	144.277	115.992
4.5	1	48	12	2	117.853	0.72	79.72	5.48	4	85.631	133.015	133.99
4.5	1	48	12	2	209.267	1.12	57.0133	13.4533	4	105.392	126.216	143.99
4.5	1	48	12	2	121.533	0.72	90.92	20.12	4	98.38	67.358	151.989
4.5	1	48	12	2	149.573	1.28	126.08	34.76	4	100.293	56.733	145.99
4.5	1	48	12	2	117.2	1.33333	114.427	29.48	4	67.145	67.145	143.99
4.5	1	48	12	2	175.773	1.84	125.36	49.92	4	76.495	82.444	149.989
4.5	1	48	12	2	135.067	1.36	123.227	28.4933	4	75.857	111.342	151.989
4.5	1	48	12	2	187.16	1.29333	139.96	31.6667	4	70.545	121.541	147.989
4.5	1	48	12	2	222.893	1.41333	160.627	68.88	4	56.096	86.269	143.99
4.5	1	48	12	2	187.6	1.70667	144.227	24.52	4	45.472	83.507	135.99
4.5	1	48	12	2	81.2533	1.12	37.3067	21.8533	4	42.922	65.445	129.991
4.5	1	48	12	2	113.067	19.1867	36.2	11.0267	4	47.597	45.259	125.991
4.5	1	48	12	2	103.933	10.7067	68.56	19.8267	4	54.184	31.66	119.991
4.5	1	48	12	2	109.24	4.24	66.68	16.0533	4	76.07	30.173	119.991
4.5	1	48	12	2	130.84	1.8	79.0133	30.64	4	102.843	40.372	125.991
4.5	1	48	12	2	99.1867	1.32	74.6533	14.08	4	99.23	29.96	109.992
4.5	1	48	12	2	113	4.69333	126.24	41.6667	4	67.57	17.636	93.9933
4.5	1	48	12	2	125.147	8.56	86.0133	16.36	4	40.372	34.848	101.993
4.5	1	48	12	2	129.867	1.6	62.28	4.52	4	32.085	60.558	99.9929
4.5	1	48	12	2	201.933	3.97333	141.4	17.4533	4	31.448	81.594	113.992
4.5	1	48	12	2	230.16	0.76	74.2267	39.88	4	28.473	99.018	113.992
4.5	1	48	12	2	129.013	1.6	117.987	45.6667	4	37.822	122.604	101.993
4.5	1	48	12	2	134.52	3.42667	112.693	46	4	51.209	135.99	89.9936
4.5	1	48	12	2	134.12	3.65333	115.2	58.5067	4	67.145	144.277	85.9939
4.5	1	48	12	2	230.507	1.89333	176.32	73.3867	4	84.144	147.039	67.9951
4.5	1	48	12	2	177.613	2.41333	84.6133	12.52	4	94.343	147.252	87.9937
4.5	1	48	12	2	168.747	2.29333	82.9067	10.4667	4	108.367	142.577	85.9939
4.5	1	48	12	2	105.347	1.97333	87.8533	6.94667	4	125.154	130.678	93.9933
4.5	1	48	12	2	169.52	5.14667	86.48	33.4667	4	97.531	91.368	155.989
4.5	1	48	12	2	133.88	2.17333	123.653	31.4133	4	88.819	105.605	155.989
4.5	1	48	12	2	89.6533	1.97333	66.7333	37.44	4	111.342	105.18	151.989
4.5	1	48	12	2	133.747	7.05333	73.0133	21.2133	4	120.054	92.218	143.99
4.5	1	48	12	2	104.28	1.17333	57.6	5.33333	4	125.154	111.13	133.99
4.5	1	48	12	2	93.0267	1	81.64	9.54667	4	127.278	74.795	129.991
4.5	1	48	12	2	133.253	1.84	92.3467	14.6	4	136.203	107.73	113.992
4.5	1	48	12	2	116.56	1.76	121.173	28.96	4	137.053	85.844	105.992
4.5	1	48	12	2	153.84	2.09333	129.827	28.6267	4	130.041	62.258	103.993
4.5	1	48	12	2	175.48	3.25333	174.533	48.4667	4	125.366	45.259	89.9936
4.5	1	48	12	2	215.28	3.64	173.787	35.2667	4	104.543	29.748	83.994
4.5	1	48	12	2	226.84	1.93333	132.827	30.2133	4	85.844	22.098	79.9943
4.5	1	48	12	2	254.253	4.45333	179.267	32.4133	4	60.771	15.724	71.9949
4.5	1	48	12	2	221.133	3.06667	85.2533	8.77333	4	40.585	28.898	69.995
4.5	1	48	12	2	205.493	1.97333	105.613	5.85333	4	29.96	56.946	77.9944
4.5	1	48	12	2	213.893	1.72	108.973	11.36	4	25.711	84.781	71.9949
4.5	1	48	12	2	250.987	3.37333	162.427	45.28	4	25.498	104.967	75.9946
4.5	1	48	12	2	239.413	4.01333	109.96	14.7867	4	129.403	120.479	73.9947
4.5	1	48	12	2	128.147	1.52	93.3867	8.50667	4	52.271	132.378	115.992
4.5	1	48	12	2	117.107	1.56	166.933	19.1467	4	60.983	125.366	133.99
4.5	1	48	12	2	165.693	1.36	143.827	37.16	4	48.234	113.679	129.991
4.5	1	48	12	2	168.2	2.61333	176.493	30.96	4	97.106	30.598	65.9953
4.5	1	48	12	2	253.72	29.16	106.853	89.92	4	76.282	34.848	55.996
4.5	1	48	12	2	227.04	13.2267	171.12	18.8667	4	112.404	37.61	69.995
4.5	1	48	12	2	138.68	30.24	6.92	37.3067	3	54.184	45.047	107.992
4.5	1	48	12	2	133.627	41.2667	2.57333	2.89333	2	62.896	42.284	123.991
4.5	1	48	12	2	149.88	40.3067	3.12	8.04	2	61.833	33.148	113.992
4.5	1	48	12	2	125.747	40.8133	5.08	4.42667	2	71.182	34.848	113.992
4.5	1	48	12	2	162.92	64.9867	5.05333	5.78667	2	49.084	33.36	97.993
4.5	1	48	12	2	214.667	77.0667	4.46667	4.94667	2	63.745	28.26	97.993
4.5	1	48	12	2	138.853	48.9467	9.06667	5.62667	2	70.545	37.397	95.9931
4.5	1	48	12	2	194.84	95.2	7.84	4.78667	2	65.87	43.134	85.9939
4.5	1	48	12	2	225	91.76	16.2533	3.85333	2	54.821	37.61	81.9941
4.5	1	48	12	2	243.013	152.387	20.6267	5.45333	2	40.585	47.809	79.9943
4.5	1	48	12	2	221.747	79.6533	3.62667	6.4	2	50.571	46.322	77.9944
4.5	1	48	12	2	252.76	51.9867	12.08	3.13333	2	46.322	33.148	77.9944
4.5	1	48	12	2	241.8	123.267	5.96	9.57333	2	55.034	41.222	61.9956
4.5	1	48	12	2	205.053	131.347	29.44	10.1067	2	66.083	39.31	65.9953
4.5	1	48	12	2	233	131.107	5.72	8.13333	2	61.196	38.672	53.9961
4.5	1	48	12	2	255	174.773	12.2667	29.4667	3	69.058	27.623	59.9957
4.5	1	48	12	2	219.2	97.52	8.29333	7.62667	2	66.083	24.436	67.9951
4.5	1	48	12	2	232.053	83.7733	14.08	11.5867	2	61.408	22.736	77.9944
4.5	1	48	12	2	251.36	78.52	7.12	16.6533	2	57.158	29.748	71.9949
4.5	1	48	12	2	253.28	156.587	6.22667	12.44	2	51.209	32.935	61.9956
4.5	1	48	12	2	229.853	55.8267	3.86667	9.48	2	45.047	41.86	97.993
4.5	1	48	12	2	154.147	53	6.64	7.38667	2	54.821	31.023	101.993
4.5	1	48	12	2	120.027	43.7067	4.05333	5.52	2	63.32	42.497	105.992
4.5	1	48	12	2	150.72	46.8667	9.24	5.32	2	71.182	28.898	103.993
4.5	1	48	12	4	144.52	2.16	128.12	7.78667	4	66.083	68.42	13.999
4.5	1	48	12	4	249.027	2.24	121.307	5.17333	4	87.331	55.671	13.999
4.5	1	48	12	4	230.293	2.25333	187.08	10.76	4	84.356	91.156	17.9987
4.5	1	48	12	4	247.28	2.32	77.9733	7.2	4	59.708	85.844	21.9984
4.5	1	48	12	4	188.64	7.41333	123.587	12.6267	4	40.797	77.982	21.9984
4.5	1	48	12	4	231.493	2.49333	134.093	8.56	4	111.979	100.718	23.9983
4.5	1	48	12	4	191.107	1.73333	78.8133	8.10667	4	113.467	66.508	19.9986
4.5	1	48	12	4	103.92	1.08	42.2	13.68	4	128.978	50.784	31.9977
4.5	1	48	12	4	144.04	1.48	48.3867	4.90667	4	135.778	61.621	37.9973
4.5	1	48	12	4	86.36	1.16	42	11.7733	4	147.039	82.232	45.9967
4.5	1	48	12	4	174.547	1.64	71	7.34667	4	131.741	94.981	31.9977
4.5	1	48	12	4	224.627	1.92	136.493	8.65333	4	103.905	114.742	43.9969
4.5	1	48	12	4	242.16	3.18667	163.173	36.9067	4	80.532	120.904	55.996
4.5	1	48	12	4	213.227	2.32	115.28	6.2	4	60.346	117.504	67.9951
4.5	1	48	12	4	234.4	2.53333	134.52	7.84	4	36.122	104.967	65.9953
4.5	1	48	12	4	85.6133	6.26667	43.4267	2.61333	4	25.923	70.757	89.9936
4.5	1	48	12	4	204.2	5.21333	125.72	20.7867	4	33.785	43.347	71.9949
4.5	1	48	12	4	220.213	5.54667	143.933	16.5467	4	38.247	38.672	67.9951
4.5	1	48	12	4	171.587	2.44	110.387	9.65333	4	60.133	27.623	67.9951
4.5	1	48	12	4	140.067	2.74667	80.32	8.94667	4	85.419	24.223	67.9951
4.5	1	48	12	4	139.44	1.72	53.4133	18.8533	4	113.679	25.711	69.995
4.5	1	48	12	4	80.8	1.2	40.1867	13.6133	4	128.128	32.298	59.9957
4.5	1	48	12	4	133.747	1.2	52.4267	7.4	4	136.415	43.559	57.9959
4.5	1	48	12	4	64.2933	0.96	46.64	10.32	4	143.852	58.646	57.9959
4.5	1	48	12	4	72.6933	1.12	49.0133	6.92	4	150.014	73.095	63.9954
4.5	1	48	12	4	56.48	0.88	31.88	3.81333	4	145.34	101.568	63.9954
4.5	1	48	12	4	149.427	1	57.8933	3.62667	4	134.078	117.504	63.9954
4.5	1	48	12	4	141.893	1.76	110.493	21.72	4	105.18	129.191	77.9944
4.5	1	48	12	4	90.7333	0.72	72.4267	31.7333	4	122.179	128.766	97.993
4.5	1	48	12	4	226.667	7.78667	147.12	64.6533	4	54.184	61.621	19.9986
4.5	1	48	12	4	239.507	119.733	29.32	8.32	2	42.497	68.42	27.998
4.5	1	48	12	4	156.827	1.6	35.7333	27.1733	4	99.868	45.047	23.9983
4.5	1	48	12	4	76.2533	0.56	34.24	3.97333	4	154.901	102.418	71.9949
4.5	1	48	12	4	228.8	5.57333	132.4	13.96	4	35.272	92.856	37.9973
4.5	1	48	12	4	189.667	8.4	145.573	9.94667	4	29.11	57.158	39.9971
4.5	1	48	12	4	238.027	3.6	140.333	32.6667	4	52.059	43.559	35.9974
4.5	1	48	12	4	99.12	3.36	91.8267	9.02667	4	72.457	34.21	37.9973
4.5	1	48	12	4	139.88	1.2	77.48	7.88	4	100.505	32.935	37.9973
4.5	1	48	12	4	105.867	1.08	62.1867	9.34667	4	109.005	34.21	35.9974
4.5	1	48	12	4	109.053	1.28	65.16	13	4	90.731	87.544	139.99
4.5	1	48	12	4	84.7733	1.25333	59.0133	9.76	4	111.555	95.831	143.99
4.5	1	48	12	4	54.4933	0.84	43.6533	8.78667	4	112.617	63.533	135.99
4.5	1	48	12	4	132.907	1.56	89.4267	29.4667	4	87.544	107.73	131.991
4.5	1	48	12	4	87.1333	1.72	62.68	7.04	4	69.058	102.205	125.991
4.5	1	48	12	4	109.8	0.6	65.0533	7.50667	4	66.508	74.795	127.991
4.5	1	48	12	4	67.5733	1.68	69.9067	14.2933	4	50.571	97.743	115.992
4.5	1	48	12	4	74.1467	1.16	79.2267	22.5333	4	89.031	58.646	123.991
4.5	1	48	12	4	59.8	0.32	34.6667	6.93333	4	130.466	79.469	141.99
4.5	1	48	12	4	77.56	0.84	44.64	13.3067	4	110.917	114.954	121.991
4.5	1	48	12	4	81.64	2.05333	68.52	18.04	4	82.869	120.054	111.992
4.5	1	48	12	4	137.853	1.6	133.96	44.4133	4	65.445	120.479	99.9929
4.5	1	48	12	4	181.667	1.8	156.413	51.5467	4	70.97	126.003	93.9933
4.5	1	48	12	4	134.8	1.76	115.733	34.7733	4	89.456	125.791	91.9934
4.5	1	48	12	4	103.307	2.12	109.16	14.96	4	41.222	108.792	85.9939
4.5	1	48	12	4	60.9467	0.6	23	6.48	4	154.476	56.733	67.9951
4.5	1	48	12	4	53.2	0.6	18.84	4.2	4	143.64	42.497	67.9951
4.5	1	48	12	4	51.8667	0.68	20.8933	4.53333	4	158.939	74.37	71.9949
4.5	1	48	12	4	35.9467	1.36	26.0267	8.08	4	104.543	28.26	61.9956
4.5	1	48	12	4	41.7067	0.32	26.12	5.81333	4	131.316	99.018	125.991
4.5	1	48	12	4	15.9867	0.56	15.56	1.68	4	134.503	75.645	115.992
4.5	1	48	12	4	43.28	1.6	52.3333	4.28	4	147.252	75.432	95.9932
4.5	1	48	12	4	33.3733	0.52	20.4533	3.93333	4	159.789	79.044	87.9937
4.5	1	48	12	4	56.08	1.2	56.6267	8.37333	4	149.802	78.619	77.9944
4.5	1	48	12	4	31.7333	0.16	21.8133	3.81333	4	121.541	79.894	129.991
4.5	1	48	12	4	98.9733	3.92	96.0933	16.5467	4	69.907	44.622	115.992
4.5	1	48	12	4	93.2933	1.44	89.9867	19.2267	4	50.996	42.709	101.993
4.5	1	48	12	4	82.1067	1.36	70.0533	14.0267	4	45.259	49.721	107.992
4.5	1	48	12	4	97.8133	1.88	72.0933	9.38667	4	78.619	30.81	97.993
4.5	1	48	12	4	86.5333	0.8	52.7733	14.72	4	107.305	30.385	97.993
4.5	1	48	12	4	50.0667	0.2	33.5333	7.98667	4	120.054	44.409	119.991
4.5	1	48	12	4	57.28	0.52	25.3333	3.53333	4	140.027	107.73	107.992
4.5	1	48	12	4	33.1067	0.52	14.44	2.36	4	129.828	102.843	103.993
4.5	1	48	12	4	43.48	0.96	28.2533	4.68	4	127.278	43.772	41.997
4.5	1	48	12	4	143.213	0.72	50.28	10.8133	4	137.265	41.435	53.9961
4.5	1	48	12	4	31.04	1.2	24.08	5.73333	4	119.629	33.785	49.9964
4.5	1	48	12	4	254.613	94.0267	9.74667	54.48	3	45.259	87.544	31.9977
4.5	1	48	12	4	197.893	108.867	3.32	5.14667	2	41.647	58.646	35.9974
4.5	1	48	12	4	252.013	93.6267	12.8933	6.08	2	55.671	62.896	35.9974
4.5	1	48	12	4	238.267	56.9333	6.09333	4.01333	2	51.209	73.732	35.9974
4.5	1	48	12	4	156.933	66.24	2.61333	2.64	2	46.322	45.047	67.9951
4.5	1	48	12	4	233.28	86.3067	3.45333	4.49333	2	31.66	50.571	57.9959
4.5	1	48	12	4	219.827	69.72	2.86667	2.73333	2	42.072	56.521	57.9959
4.5	1	48	12	4	220.84	100.907	3.65333	5.89333	2	43.772	66.295	41.997
4.5	1	48	12	4	249.56	50.7867	2.70667	3.33333	2	30.385	72.032	45.9967
4.5	1	48	12	4	184.333	52.8933	2.12	3.34667	2	58.433	76.707	51.9963
4.5	1	48	12	4	249.507	112.2	8.24	12.7067	2	40.797	64.17	49.9964
4.5	1	48	12	4	254.387	112.96	11.52	63.4	3	32.085	83.507	41.997
4.5	1	48	12	4	222.573	67.12	5.92	4.92	2	43.984	48.022	49.9964
4.5	1	48	12	4	214.147	42.9733	2.21333	3.58667	2	51.634	52.909	63.9954
4.5	1	48	12	4	239.6	62.24	6.02667	5.41333	2	53.546	62.258	49.9964
4.5	1	48	12	4	222.187	65.9067	2.94667	3.77333	2	37.822	83.719	53.9961
4.5	1	48	12	4	254.907	80.8933	6.50667	7.25333	2	32.723	89.456	49.9964
4.5	1	48	12	4	248.947	79.68	5.09333	7.90667	2	42.497	96.681	55.996
4.5	1	48	12	4	251.773	70.0933	3.57333	10.3067	2	45.684	87.969	41.997
4.5	1	48	12	4	167.573	33.92	1.73333	3.42667	2	48.659	81.807	55.996
4.5	1	48	12	4	198.467	89.52	1.92	4.65333	2	25.286	83.507	69.995
4.5	1	48	12	4	238.88	80.3467	5.04	7.28	2	33.148	95.618	69.995
4.5	1	48	12	4	127.747	43.2	2.10667	3.13333	2	46.322	92.643	63.9954
4.5	1	48	12	4	165.493	62.92	2.06667	4.49333	2	29.535	88.181	81.9941
4.5	1	48	12	4	166.867	54.9333	1.98667	3.18667	2	37.822	89.669	81.9941
4.5	1	48	12	4	119.573	47.9467	7.41333	4.13333	2	46.322	89.456	83.994
4.5	1	48	12	6	203.773	12.5067	144.413	33.0933	4	81.169	64.383	17.9987
4.5	1	48	12	6	248.413	43.8	137.453	27.4533	4	93.493	46.322	19.9986
4.5	1	48	12	6	214.853	1.56	153.12	37.52	4	106.667	59.071	19.9986
4.5	1	48	12	6	242.787	9.45333	198.547	58.0267	4	108.58	80.107	23.9983
4.5	1	48	12	6	164.573	10.1467	180.187	44.4133	4	120.479	91.368	25.9981
4.5	1	48	12	6	242.773	6	196.227	35.9333	4	84.144	80.532	17.9987
4.5	1	48	12	6	245.36	4.65333	164.04	44.1733	4	82.232	100.08	23.9983
4.5	1	48	12	6	242.48	5.73333	187.96	49.5067	4	65.02	92.218	29.9979
4.5	1	48	12	6	248.827	3.22667	126.64	13.68	4	59.496	62.683	27.998
4.5	1	48	12	6	250.533	3.4	161.16	40.0133	4	70.12	36.76	29.9979
4.5	1	48	12	6	237.933	3.2	164.467	11.9733	4	111.13	38.035	29.9979
4.5	1	48	12	6	143.48	1.48	151.16	41.9067	4	121.966	67.145	29.9979
4.5	1	48	12	6	245	4.08	225.253	68.8933	4	96.681	123.029	35.9974
4.5	1	48	12	6	175.507	8.02667	96.6933	14.68	4	89.244	84.144	31.9977
4.5	1	48	12	6	164.813	2.54667	204.2	58.88	4	42.922	67.783	41.997
4.5	1	48	12	6	225.227	14.7067	198.493	67.72	4	56.946	34.635	41.997
4.5	1	48	12	6	189.973	3	171.333	20.44	4	92.431	18.486	41.997
4.5	1	48	12	6	135.693	2.57333	141.107	56.4933	4	116.229	28.26	45.9967
4.5	1	48	12	6	217.52	3.37333	216.44	19.0133	4	109.642	16.149	57.9959
4.5	1	48	12	6	155.867	1.96	173.227	35.1067	4	130.678	48.659	55.996
4.5	1	48	12	6	220.147	2.49333	201.32	26.1067	4	132.591	74.157	45.9967
4.5	1	48	12	6	176.133	40.1467	82.6267	13.8933	4	100.08	87.756	43.9969
4.5	1	48	12	6	159.867	2.48	148.373	11.56	4	128.766	93.281	63.9954
4.5	1	48	12	6	236.813	1.65333	182.427	12.8	4	130.466	32.51	67.9951
4.5	1	48	12	6	252.72	2.64	223.12	50.5867	4	39.947	37.61	65.9953
4.5	1	48	12	6	165.693	21.6267	164.307	22.3067	4	32.723	61.833	77.9944
4.5	1	48	12	6	139.147	35.8667	180.84	18.2933	4	35.697	77.344	81.9941
4.5	1	48	12	6	235	3.68	221.333	32.4533	4	39.522	92.643	69.995
4.5	1	48	12	6	238.373	1.77333	214.347	47.8533	4	50.146	97.743	55.996
4.5	1	48	12	6	208	7.70667	214.68	43.3867	4	67.783	111.979	55.996
4.5	1	48	12	6	170.2	2.78667	173.053	32.8267	4	83.931	12.112	61.9956
4.5	1	48	12	6	188.467	6.17333	182	32.24	4	72.882	18.911	59.9957
4.5	1	48	12	6	235.213	1.65333	98.9467	74.92	4	59.921	19.974	63.9954
4.5	1	48	12	6	253.013	1.97333	229.213	58.08	4	41.647	40.16	63.9954
4.5	1	48	12	6	179.293	1.61333	133.2	11.7867	4	138.115	67.995	73.9947
4.5	1	48	12	6	160.253	2.84	99.7733	7.94667	4	134.503	84.781	79.9943
4.5	1	48	12	6	169.427	21.44	76.8133	21.2533	4	116.867	97.106	75.9946
4.5	1	48	12	6	93.9467	10.7733	88.88	7.76	4	110.705	112.617	75.9946
4.5	1	48	12	6	102.453	6.69333	70.8267	34.3867	4	89.456	118.354	71.9948
4.5	1	48	12	6	91.8667	1.36	81.92	8.06667	4	136.415	53.121	85.9938
4.5	1	48	12	6	174.613	2.48	121.587	9.45333	4	128.341	32.51	89.9936
4.5	1	48	12	6	209.067	1.68	113.733	9.08	4	106.88	12.537	81.9941
4.5	1	48	12	6	109.853	3.24	116.56	7.88	4	76.707	13.599	87.9937
4.5	1	48	12	6	247.653	2.48	88.24	48.7333	4	63.533	14.874	83.994
4.5	1	48	12	6	148.68	1.4	88.9867	6.52	4	43.984	69.058	109.992
4.5	1	48	12	6	139.147	1.36	97.36	5.42667	4	50.359	98.38	103.993
4.5	1	48	12	6	60.8533	2.57333	55.0933	4.92	4	97.318	112.192	101.993
4.5	1	48	12	6	104.587	1.76	63.28	8	4	120.479	93.706	91.9934
4.5	1	48	12	6	97.1067	1.88	51.1333	4.26667	4	125.366	81.382	109.992
4.5	1	48	12	6	54.5067	1.4	36.1067	4.14667	4	84.781	106.03	119.991
4.5	1	48	12	6	67.7067	1.05333	50.5467	7.4	4	103.055	89.456	121.991
4.5	1	48	12	6	68.9067	1.16	69.9333	9.90667	4	100.93	67.145	135.99
4.5	1	48	12	6	59.68	1.05333	53.7333	7.97333	4	100.718	74.795	135.99
4.5	1	48	12	6	66	0.96	55.5733	11.1467	4	71.395	84.994	135.99
4.5	1	48	12	6	102.787	0.92	67.0933	11.1467	4	62.896	58.858	133.99
4.5	1	48	12	6	85.36	1.2	88.5867	18.7867	4	83.507	41.435	135.99
4.5	1	48	12	6	65.72	1.12	68.8	5.4	4	100.93	42.284	129.991
4.5	1	48	12	6	89.0933	0.76	33.7867	3.64	4	120.691	64.383	121.991
4.5	1	48	12	6	100.44	0.64	77.2133	7	4	56.521	37.61	115.992
4.5	1	48	12	6	81.3733	2.77333	72.32	8.44	4	47.809	104.543	93.9933
4.5	1	48	12	6	71.9867	3.58667	51.8133	8.12	4	72.67	113.254	95.9931
4.5	1	48	12	6	192.16	1.16	89.1733	9.36	4	121.541	42.709	113.992
4.5	1	48	12	6	150.347	1.6	91.2667	18.1333	4	102.418	21.036	105.992
4.5	1	48	12	6	114.12	1.6	55.4133	3.88	4	74.582	17.636	107.992
4.5	1	48	12	6	192.48	2.78667	65.0267	5.28	4	66.083	16.786	99.9928
4.5	1	48	12	6	130.507	63.0133	5.76	12.2933	2	105.605	104.967	65.9953
4.5	1	48	12	6	173.267	97.6533	20.88	9.53333	2	81.807	101.78	49.9964
4.5	1	48	12	6	232.507	137.613	4.09333	9.44	2	115.167	113.892	49.9964
4.5	1	48	12	6	211.84	175.333	4.64	8.56	2	109.43	117.079	43.9969
4.5	1	48	12	6	222.107	103.147	3	5.24	2	108.155	107.092	33.9976
4.5	1	48	12	6	241.573	177.84	6.25333	16	2	100.93	92.218	27.998
4.5	1	48	12	6	223.52	188.64	4.57333	8.18667	2	111.555	91.793	25.9981
4.5	1	48	12	6	171.36	166.333	4.85333	8.22667	2	93.068	96.468	25.9981
4.5	1	48	12	6	214.427	110.787	2.98667	5.36	2	101.78	103.268	25.9981
4.5	1	48	12	6	241.667	155.413	8.41333	13.8933	2	105.817	86.056	27.998
4.5	1	48	12	6	172.907	93.8533	23.9733	16.48	2	81.594	89.669	23.9983
4.5	1	48	12	6	238.187	73.52	19.4533	18.72	2	85.419	105.817	33.9976
4.5	1	48	12	6	227.267	81.92	3.12	5.01333	2	97.743	108.58	39.9971
4.5	1	48	12	6	195.093	92.76	3.96	7.37333	2	91.793	101.355	39.9971
4.5	1	48	12	6	227.16	113.707	4.48	10.3467	2	114.317	103.905	29.9979
4.5	1	48	12	6	233.947	55.7467	6.72	7.82667	2	100.293	116.229	39.9971
4.5	1	48	12	6	203.893	96.1067	4.72	6.53333	2	108.58	104.118	51.9963
4.5	1	48	12	6	211.853	81.48	3.56	5.74667	2	112.829	98.805	47.9966
4.5	1	48	12	6	234	120.693	4.90667	15.3733	2	108.792	90.519	39.9971
4.5	1	48	12	6	220.8	166.027	17.6933	11.88	2	116.654	91.581	37.9973
4.5	1	48	12	6	217.053	84.7733	7.25333	8.38667	2	122.391	98.593	53.9961
4.5	1	48	12	6	163.2	60.4533	2.62667	4.68	2	89.669	114.317	41.997
4.5	1	48	12	6	166.347	78.44	11.5333	19.4133	2	110.067	99.018	63.9954
4.5	1	48	12	7	85.4533	0.68	33.3067	3.93333	4	68.42	72.457	9.99929
4.5	1	48	12	7	187.48	1.04	63.8933	17.2533	4	89.031	83.507	9.99929
4.5	1	48	12	7	116.72	0.72	50.0667	5.38667	4	99.23	55.671	9.99929
4.5	1	48	12	7	185.427	1.89333	73.32	8.28	4	114.529	87.969	11.9991
4.5	1	48	12	7	116.96	2	78.88	7.8	4	115.804	68.845	15.9989
4.5	1	48	12	7	156.133	2.01333	113.573	13.8267	4	99.868	102.418	15.9989
4.5	1	48	12	7	83.12	1.16	28.4533	7.21333	4	75.22	42.497	13.999
4.5	1	48	12	7	134.68	11.44	58.5067	6.46667	4	64.808	37.185	27.998
4.5	1	48	12	7	226.213	0.76	64.04	6.93333	4	43.559	67.995	21.9984
4.5	1	48	12	7	230.227	1.28	87.2533	6.96	4	106.667	112.404	25.9981
4.5	1	48	12	7	170.347	2.85333	63.76	9.65333	4	124.729	104.967	25.9981
4.5	1	48	12	7	112.453	1.29333	82.7467	9.6	4	133.865	83.082	31.9977
4.5	1	48	12	7	225.92	2.44	114.733	35.1333	4	71.182	111.979	31.9977
4.5	1	48	12	7	222.467	2.30667	120.533	29.6	4	77.982	121.966	41.997
4.5	1	48	12	7	184.627	2.92	140.6	10.12	4	98.168	123.879	43.9969
4.5	1	48	12	7	135.467	1.64	110.947	10.64	4	118.991	115.804	43.9969
4.5	1	48	12	7	198.373	1.88	130.707	28.44	4	41.86	94.343	35.9974
4.5	1	48	12	7	182.933	1.68	130.187	23.2667	4	29.323	89.031	51.9963
4.5	1	48	12	7	128.893	1.48	87.2933	10.84	4	25.498	63.745	39.9971
4.5	1	48	12	7	149.253	1.72	55.5867	6.74667	4	39.522	36.972	49.9964
4.5	1	48	12	7	88.4933	1.48	33.6267	5.2	4	60.133	24.648	45.9967
4.5	1	48	12	7	153.027	5.89333	18.9067	3.94667	4	59.496	37.61	45.9967
4.5	1	48	12	7	111.307	0.96	32.9733	4.10667	4	138.753	67.145	47.9966
4.5	1	48	12	7	232.68	1.8	80.9733	9.12	4	143.002	98.38	41.997
4.5	1	48	12	7	97.5333	0.56	29.1867	5.78667	4	125.579	48.022	31.9977
4.5	1	48	12	7	177.427	1.82667	79.52	9.18667	4	21.461	59.708	67.9951
4.5	1	48	12	7	201.773	2.8	69.0933	10.4933	4	17.636	63.108	73.9947
4.5	1	48	12	7	63.96	0.6	23.8133	2.65333	4	125.579	63.533	79.9943
4.5	1	48	12	7	118.453	0.6	47.8133	6.02667	4	133.015	88.181	65.9953
4.5	1	48	12	7	130.92	2	100.587	12.3333	4	134.928	106.667	61.9956
4.5	1	48	12	7	153.067	2.12	95.76	45.6267	4	58.221	110.917	81.9942
4.5	1	48	12	7	138.213	1.16	121.6	46.4267	4	76.07	116.229	81.9942
4.5	1	48	12	7	243.973	2.45333	106.827	14.6533	4	37.61	108.58	75.9946
4.5	1	48	12	7	191.987	1.56	83.56	8.26667	4	30.598	93.918	79.9943
4.5	1	48	12	7	96.8	0.64	38.1467	4.16	4	37.61	54.184	87.9937
4.5	1	48	12	7	62.8133	1.76	31.1467	24.0133	4	63.108	37.61	101.993
4.5	1	48	12	7	78.08	1.28	36.04	24.36	4	59.921	44.409	103.993
4.5	1	48	12	7	69.4	0.6	37.5867	12.2	4	115.379	56.308	109.992
4.5	1	48	12	7	56.72	1	35.2533	7.17333	4	129.616	82.657	99.9929
4.5	1	48	12	7	50.2933	1.04	46.32	4.81333	4	131.316	94.131	101.993
4.5	1	48	12	7	93.1067	0.48	53.6667	22.8267	4	95.193	121.329	111.992
4.5	1	48	12	7	71.4133	0.48	20.9467	3.42667	4	67.358	110.28	121.991
4.5	1	48	12	7	53.84	0.92	50.1733	15.2133	4	81.807	70.332	127.991
4.5	1	48	12	7	73.2933	0.64	53.0533	28.2133	4	86.906	92.643	133.99
4.5	1	48	12	7	104.733	5.88	60.84	28.2933	4	64.595	86.269	131.991
4.5	1	48	12	7	78.4267	1	42.5467	7.86667	4	107.092	96.681	129.991
4.5	1	48	12	7	68.04	0.96	37.9733	7.12	4	113.892	90.943	123.991
4.5	1	48	12	7	168.573	0.84	55.3467	18.2933	4	53.759	69.907	117.992
4.5	1	48	12	7	59.68	0.76	24.3733	12.2933	4	89.031	50.784	125.991
4.5	1	48	12	7	32.4667	0.52	18.48	11.9733	4	91.793	42.922	121.991
4.5	1	48	12	7	16.5333	1.16	6.17333	1.44	4	106.03	36.335	111.992
4.5	1	48	12	7	31.24	0.64	10.1733	1.32	4	82.444	17.636	71.9949
4.5	1	48	12	7	91.6	0.92	14.1333	2.44	4	56.308	27.198	71.9949
4.5	1	48	12	7	17.5067	1.72	5.84	1.41333	4	76.707	32.51	93.9933
4.5	1	48	12	7	33.4267	0.88	8.58667	0.92	4	109.43	30.598	79.9943
4.5	1	48	12	7	36.2267	0.44	6.82667	1.36	4	115.167	21.036	65.9953
4.5	1	48	12	7	76.3733	5.76	7.36	1.96	4	98.805	25.923	57.9959
4.5	1	48	12	7	35.16	0.4	13.5733	2.77333	4	100.293	15.086	43.9969
4.5	1	48	12	7	29.4	0.24	6.84	1.76	4	124.941	38.247	83.994
4.5	1	48	12	7	15.72	0.84	5.21333	0.8	4	123.666	49.084	97.993
4.5	1	48	12	7	49.5067	0.96	12.2667	2.85333	4	133.015	44.197	59.9957
4.5	1	48	12	7	103.787	1.04	29.68	3.2	4	73.52	41.01	17.9987
4.5	1	48	12	7	81.8667	27.2	0.813333	2.57333	2	90.094	17.849	43.9969
4.5	1	48	12	7	68.1867	31.68	1.4	2.85333	2	94.768	26.561	35.9974
4.5	1	48	12	7	82.7333	44.7733	1.29333	5.48	2	70.12	23.586	31.9977
4.5	1	48	12	7	35.1333	10.52	3	4.26667	2	86.056	36.972	17.9987
4.5	1	48	12	7	36.1333	14.04	0.653333	0.773333	2	83.931	29.535	59.9957
4.5	1	48	12	7	76.0667	19.2533	1.93333	1.92	2	100.93	26.561	43.9969
4.5	1	48	12	7	84.7333	16.1067	0.453333	1.52	2	116.229	32.298	33.9976
4.5	2	0	3	1	42.64	12.5067	41.3333	29.96	4	88.807	112.788	2
4.5	2	0	3	1	53.9867	14.48	50.36	55.6267	3	79.439	93.678	2
4.5	2	0	3	1	32.6533	13.0933	70.1467	47.5067	4	91.429	83.186	2
4.5	2	0	3	1	26.88	13.1067	68.4533	50.3333	4	115.036	75.317	2
4.5	2	0	3	1	41.1067	11.6	58.4667	32.72	4	101.921	92.554	2
4.5	2	0	3	1	44.1067	13.8533	60.8667	42.96	4	120.657	94.052	2
4.5	2	0	3	1	30.68	13.5333	88.6267	57.2667	4	111.289	115.786	2
4.5	2	0	3	1	32.8	12.1067	83.9467	54.6267	4	133.022	98.549	2
4.5	2	0	3	1	36.64	24.76	74.9067	67.6267	4	126.652	117.659	2
4.5	2	0	3	1	58.68	14.9867	119.547	126.56	1	85.434	129.65	2
4.5	2	0	3	1	89.7867	31.8533	107.173	95.2533	4	72.319	117.285	2
4.5	2	0	3	1	72.4133	9.84	127.24	46.1733	4	124.404	129.275	8
4.5	2	0	3	1	51.36	16.9467	99.4533	60.2	4	103.42	139.393	7
4.5	2	0	3	1	99.6533	34.76	103.667	210.413	3	74.193	132.648	4
4.5	2	0	3	1	98.0267	15.7733	92.2	46.96	4	54.333	125.903	7
4.5	2	0	3	1	89.8933	17.2133	158.307	92.7733	4	82.062	143.514	11
4.5	2	0	3	1	110.48	33.56	147.747	222.387	3	91.429	144.264	11
4.5	2	0	3	1	67.9867	15.9867	149.453	94.4133	4	113.163	144.638	12
4.5	2	0	3	1	63.6	15.72	105.573	38.12	4	128.526	139.767	13
4.5	2	0	3	1	87.7067	20.8667	137.307	38.4267	4	140.891	137.894	15
4.5	2	0	3	1	73.1467	23.3467	132.107	46.8267	4	151.383	120.282	16
4.5	2	0	3	1	78.0133	34.5733	125.6	44.28	4	157.753	97.8	17
4.5	2	0	3	1	74.6667	38.92	156.013	62.3067	4	155.13	80.563	18
4.5	2	0	3	1	57.4667	18.7733	116.307	60.1333	4	146.887	71.57	14
4.5	2	0	3	1	55.3067	10.1467	93.84	46.9333	4	147.636	97.8	11
4.5	2	0	3	1	52.0933	20.04	134.573	63.5333	4	139.393	80.938	8
4.5	2	0	3	1	47.3867	13.24	94.88	52.08	4	130.025	67.823	8
4.5	2	0	3	1	70.4	6.34667	117.08	33.56	4	109.79	53.584	13
4.5	2	0	3	1	65.68	6.29333	90.8667	41.52	4	92.179	65.949	8
4.5	2	0	3	1	44.8667	9.65333	97.6533	80.6267	4	70.82	73.069	8
4.5	2	0	3	1	80.6533	8.38667	119.627	87.0667	4	73.818	62.202	14
4.5	2	0	3	1	60.44	17.4	103.693	40.4933	4	138.268	116.535	10
4.5	2	0	3	1	70.92	89.2667	60.3333	113.44	3	134.521	127.402	10
4.5	2	0	3	1	65.7867	15.84	121.96	53.1467	4	158.877	126.652	24
4.5	2	0	3	1	71.7467	11.4933	122.4	32.2133	4	150.634	136.77	28
4.5	2	0	3	1	143.347	38.2667	150.28	56.5067	4	136.02	146.137	24
4.5	2	0	3	1	152.04	20.9467	223.507	149.187	4	113.537	151.383	25
4.5	2	0	3	1	232.56	13.96	179.293	135.28	4	92.554	146.512	25
4.5	2	0	3	1	46.5467	3.90667	45.7867	14.4267	4	119.533	105.669	48
4.5	2	0	3	1	34.8533	3.04	35.76	10.8133	4	109.79	110.914	48
4.5	2	0	3	1	36.12	6.77333	89.2533	22.1333	4	119.158	80.188	47
4.5	2	0	3	1	31.16	5.88	70.48	36.96	4	100.797	87.308	47
4.5	2	0	3	1	31.5733	4.38667	57.76	14.2	4	136.395	79.439	45
4.5	2	0	3	1	42.2933	4.97333	58.3067	16.64	4	145.763	98.924	45
4.5	2	0	3	1	49.6133	16.76	58.1333	13.0267	4	137.519	122.531	45
4.5	2	0	3	1	39	5.93333	53.24	19.8933	4	121.406	134.896	41
4.5	2	0	3	1	42.8133	3.01333	47.0133	19.3467	4	97.425	131.149	41
4.5	2	0	3	1	45.1467	15.1067	61.6	34.0133	4	111.664	141.266	35
4.5	2	0	3	1	180.92	10.1467	86.5467	45.1467	4	110.914	150.634	35
4.5	2	0	3	1	45.4133	3.69333	60.8	12.2	4	111.664	67.073	43
4.5	2	0	3	1	33.68	3.25333	46.9867	12.6133	4	88.807	76.816	44
4.5	2	0	3	1	28.2	2.17333	34.0533	17.2	4	85.059	102.296	44
4.5	2	0	3	1	26.8	3.56	46.6533	22.4667	4	73.818	77.19	39
4.5	2	0	3	1	24.6667	2.16	33.1067	18.0133	4	75.692	94.052	42
4.5	2	0	3	1	105.187	10.56	175.92	103.88	4	60.703	142.39	16
4.5	2	0	3	1	87.08	14.6133	101.427	36.6533	4	37.846	116.16	12
4.5	2	0	3	1	85.6267	35.1867	117.747	110.64	4	66.324	83.935	4
4.5	2	0	3	1	93.5867	28.0933	110.693	122.72	3	65.949	103.42	2
4.5	2	0	3	1	103.307	33.0133	127.733	124.04	4	46.464	93.303	8
4.5	2	0	3	1	64.9067	32.3867	147.147	72.4933	4	158.503	75.692	23
4.5	2	0	3	1	115.76	31.6933	149.107	44.6533	4	161.126	91.804	25
4.5	2	0	3	1	109.84	29.9333	160.253	52.6533	4	151.758	64.076	24
4.5	2	0	3	1	72.6133	8.74667	117.32	25.0533	4	132.273	60.328	14
4.5	2	0	3	1	97.9733	14.2	142.307	62.6667	4	135.271	52.834	18
4.5	2	0	3	1	102.587	42.2667	215.573	98.7333	4	142.015	53.958	26
4.5	2	0	3	1	82.48	45.7867	169.467	89.64	4	124.404	44.965	26
4.5	2	0	3	1	90.12	17.1067	210.8	85.6133	4	112.039	43.466	26
4.5	2	0	3	1	80.3867	11.8933	164.88	71.0133	4	100.048	46.089	17
4.5	2	0	3	1	143.12	10.7467	177.84	110.733	4	91.804	47.214	26
4.5	2	0	3	1	22.0667	15.52	55.7867	33.0667	4	83.186	61.827	37
4.5	2	0	3	1	60.1733	10.04	113.173	114.533	1	60.703	74.193	12
4.5	2	0	3	1	77.1467	17.08	126.24	75.3067	4	119.908	151.009	20
4.5	2	0	3	1	54.8667	7.92	74.9733	15.2933	4	155.13	108.291	39
4.5	2	0	3	1	197.747	20.68	144.013	35.16	4	161.5	107.542	31
4.5	2	0	3	1	36.8133	10.3733	55.08	22.2933	4	106.793	52.46	38
4.5	2	0	3	1	41.24	7.52	78.0533	24.1867	4	131.898	58.08	39
4.5	2	0	3	1	48.4533	5.10667	67.68	15.28	4	147.636	72.694	39
4.5	2	0	3	1	73.7467	12.9467	148.467	61.9733	4	45.34	82.811	17
4.5	2	0	3	1	40.44	5.85333	78.9333	25	4	145.388	131.149	37
4.5	2	0	3	1	71.0667	9.65333	52.7733	22.5067	4	139.393	139.393	33
4.5	2	0	3	1	77.12	56.9733	22.5733	89.52	3	71.945	142.015	13
4.5	2	0	3	1	114.2	64.2	44.08	122	3	74.193	111.664	2
4.5	2	0	3	1	107.693	59.2933	17.56	86.52	3	57.706	116.535	7
4.5	2	0	3	1	85.1333	61.4133	24.32	110.267	3	47.214	107.917	8
4.5	2	0	3	1	103.293	116.08	52.12	70.0267	3	67.823	80.938	8
4.5	2	0	3	1	129.307	71.0133	86.2533	148.133	3	47.588	88.432	12
4.5	2	0	3	1	66.64	66.1067	23.92	192.507	3	69.322	91.055	2
4.5	2	0	3	1	125.493	67.0667	15.7067	47	3	58.83	84.31	11
4.5	2	0	3	2	28.8133	21.72	70.8	89.1333	3	92.179	98.174	2
4.5	2	0	3	2	44.4533	20.04	98.5067	87.3467	4	106.043	97.05	3
4.5	2	0	3	2	64.2667	14.4133	179.987	86.5733	4	117.659	95.177	7
4.5	2	0	3	2	66.9333	15.1467	122.773	115.573	4	109.416	119.533	7
4.5	2	0	3	2	89.6	30.5067	112.44	69.9733	4	93.303	136.02	5
4.5	2	0	3	2	36.68	14.7467	89.2267	49.44	4	79.064	109.79	3
[truncated: 3,607 more rows]
